# Supplementary material for: The nonradiative decay mechanism of dinuclear iridium complexes: a density functional theory study
Source: Royal Society of Chemistry journal article supplement (doi:10.1039/d4cp00819g), 2024-01-01
Supplement: d4cp00819g1.pdf [file d4cp00819g1.pdf]

## Supporting Information for

### The Nonradiative Decay Mechanism of Dinuclear Iridium Complexes: A Density Functional Theory Study

Guo-Jun Kang<sup>1</sup>, Yong-Fei Wu<sup>1</sup>, Xue-Feng Ren<sup>1\*</sup>, Jie-Qiong Mei<sup>1</sup>, Shi-Jian Lu<sup>1</sup>

Xi Zeng<sup>2\*</sup>

<sup>1</sup> Carbon neutrality institute and School of Chemical Engineering & Technology,  
China University of Mining and Technology, Xuzhou 221008, China.

<sup>2</sup> School of Light Industry Science and Engineering, Beijing Technology and Business  
University, Beijing 100048, China

\**Corresponding author:* Xue-Feng Ren; E-mail: [renxf@cumt.edu.cn](mailto:renxf@cumt.edu.cn); [Xi-Zeng, zengxi@btbu.edu.cn](mailto:Xi-Zeng, zengxi@btbu.edu.cn)

Figure S1. The contribution of each fragment (%) to hole and electron of the strong absorption peaks of **D1** and **D2**.

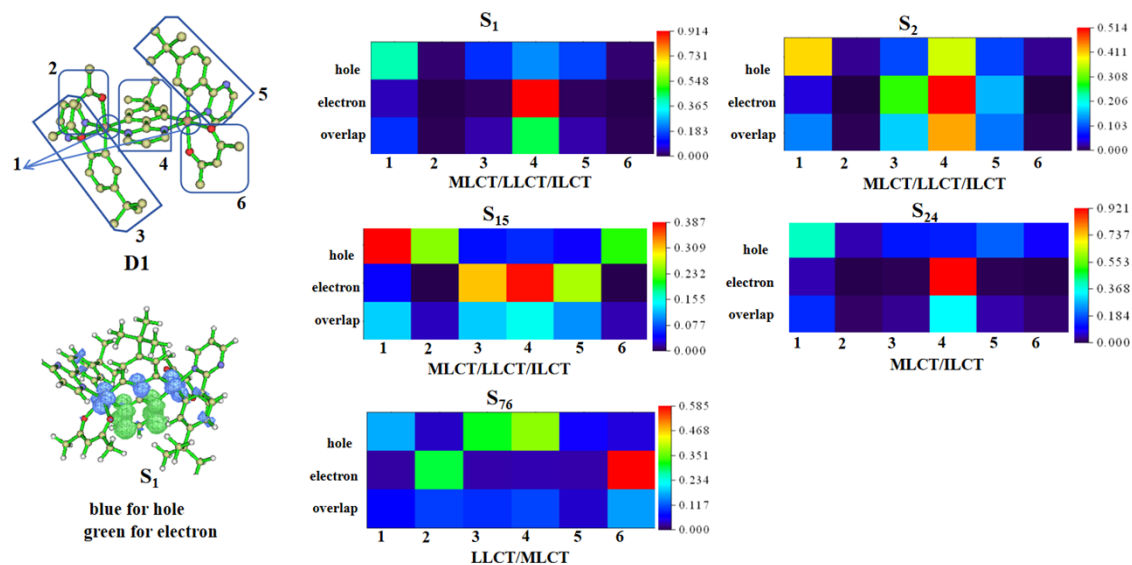

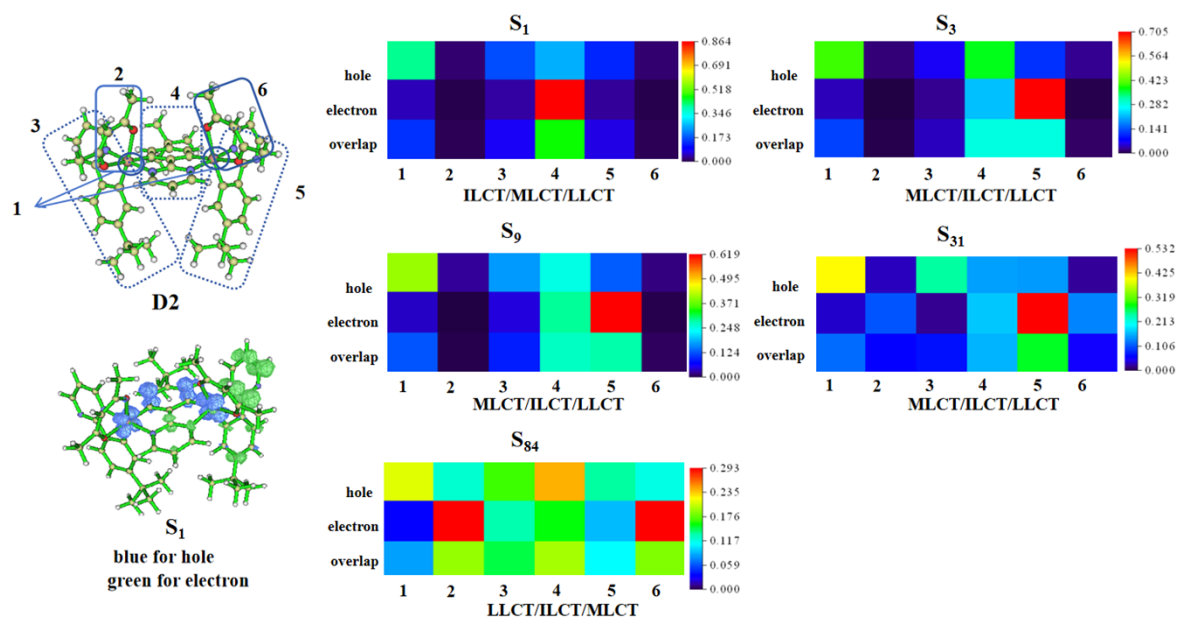

Table S1. The absorption spectra of **M1** calculated by ROCIS, s-TDDFT, SF-TDDFT, as well as LR-TDDFT with SOC correction with def2-TZVP(-f) basis set by ORCA.

|          | s-TDDFT/B3LYP          |         | s-TDDFT/PBE0  |       | s-TDDFT/M062X |           | Exp.  |         |     |
|----------|------------------------|---------|---------------|-------|---------------|-----------|-------|---------|-----|
| $S_1$    | 480.9                  | 0.01408 | $S_1$         | 469.0 | 0.02227       | $S_1$     | 413.4 | 0.00588 | 460 |
| $S_2$    | 452.3                  | 0.03215 | $S_2$         | 439.2 | 0.03091       | $S_2$     | 377.2 | 0.03778 | 411 |
| $S_5$    | 401.3                  | 0.05117 | $S_5$         | 391.4 | 0.05390       | $S_4$     | 336.5 | 0.08341 | 379 |
| $S_{10}$ | 357.8                  | 0.09053 | $S_9$         | 350.2 | 0.08666       | $S_8$     | 318.0 | 0.08788 | 340 |
| $S_{18}$ | 320.7                  | 0.02696 | $S_{13}$      | 332.4 | 0.02752       | $S_9$     | 316.5 | 0.08893 | 269 |
| $S_{21}$ | 313.7                  | 0.06243 | $S_{18}$      | 312.7 | 0.02075       | $S_{11}$  | 307.8 | 0.05828 |     |
| $S_{23}$ | 307.6                  | 0.02905 | $S_{20}$      | 308.2 | 0.02864       | $S_{16}$  | 288.4 | 0.26425 |     |
| $S_{24}$ | 304.4                  | 0.03948 | $S_{21}$      | 304.0 | 0.08981       |           |       |         |     |
| $S_{31}$ | 285.1                  | 0.2364  | $S_{23}$      | 299.9 | 0.02886       |           |       |         |     |
|          |                        |         | $S_{24}$      | 295.4 | 0.02597       |           |       |         |     |
|          |                        |         | $S_{27}$      | 286.4 | 0.06066       |           |       |         |     |
|          |                        |         | $S_{31}$      | 279.3 | 0.43517       |           |       |         |     |
|          | ROCIS/PBE0//def2-SV(P) |         | SF-TDDFT/PBE0 |       | TDDFT/PBE0    |           |       |         |     |
| $S_1$    | 44.3                   | 0.00370 | $S_1$         | 439.3 | 0.07035       | $S_7$     | 439.0 | 0.02298 |     |
| $S_2$    | 44.0                   | 0.00088 | $S_3$         | 420.2 | 0.02395       | $S_{24}$  | 407.5 | 0.02823 |     |
| $S_3$    | 42.9                   | 0.03068 | $S_4$         | 405.3 | 0.00076       | $S_{32}$  | 369.4 | 0.03665 |     |
| $S_4$    | 42.6                   | 0.00001 | $S_5$         | 398.6 | 0.12155       | $S_{53}$  | 335.1 | 0.08025 |     |
| $S_5$    | 42.4                   | 0.00046 | $S_6$         | 381.5 | 0.00408       | $S_{119}$ | 273.4 | 0.22509 |     |
|          |                        |         | $S_7$         | 371.8 | 0.01802       |           |       |         |     |
|          |                        |         | $S_8$         | 344.6 | 0.05821       |           |       |         |     |
|          |                        |         | $S_9$         | 316.0 | 0.06249       |           |       |         |     |

Table S2. Calculated phosphorescence emission wavelength (nm) of **M1** and **D2** by considering the effect of function, the transition type, and basis set.

| Basis                      | 6-31G(d)+LANLD2Z (Ir) |                  |                   |                     | 6-311G(d,p)<br>+SDD (Ir) |                 |                     |        |
|----------------------------|-----------------------|------------------|-------------------|---------------------|--------------------------|-----------------|---------------------|--------|
|                            | DF                    | TPSSh<br>(10%HF) | B3PW91<br>(20%HF) | mpw1pw91<br>(25%HF) | mpw1pw91<br>(25%HF)      | M06-2X<br>(54%) | mpw1pw91<br>(25%HF) | Exp.15 |
| Transition Wavelength (nm) |                       |                  |                   |                     |                          |                 |                     |        |
| <b>M1</b>                  | 593.2                 | 571.9            | 564.5             | 540.5*              | 479.7                    | 530.5           | 526                 |        |
| <b>D2</b>                  | 664.0                 | 683.9            | 642.6             | 665.9*              | 457.0                    | 607.5           | 606                 |        |

\*Adiabatic. DF = Density functional

**Table S3.** Calculated phosphorescence emission wavelength (nm) of **M1** and **D2** with different functional with ZORA-DEF2-TZVP+SARC-ZORA-TZVP(Ir) basis set.

|           | TPSSh | B3PW91 | PBE0  | BHANDHLYP | REVPBE38 | M062X | wB97X-D3 |
|-----------|-------|--------|-------|-----------|----------|-------|----------|
| <b>M1</b> | 554.1 | 596.9  | 583.1 | 575.2     | 573.9    | 508.3 | 508      |
| <b>D2</b> | 678.7 |        |       |           |          | 499.3 | 445.0    |

**Table S4.** The interfragment charge transfer between fragments in the main electron excitation process. (The ligand number is consistent with the Figure S1)

| <b>M1</b>       |          | Contribution of each fragment<br>to hole and electron(%) |                   |                    |                    | Transferred electron between<br>fragment |              |              |              |
|-----------------|----------|----------------------------------------------------------|-------------------|--------------------|--------------------|------------------------------------------|--------------|--------------|--------------|
|                 |          | Ligand 1<br>(Ir center)                                  | Ligand2<br>(acac) | Ligand 3<br>(ppd1) | Ligand 4<br>(ppd2) |                                          |              |              |              |
| S <sub>1</sub>  | hole     | 41.95%                                                   | 3.89%             | 27.05%             | 27.05%             | 1→2<br>0.000                             | 1→3<br>0.189 | 1→4<br>0.189 | 2→3<br>0.017 |
|                 | electron | 4.64%                                                    | 0.91%             | 47.19%             | 47.18%             | 2→4<br>0.017                             | 3→4<br>0.000 |              |              |
| S <sub>2</sub>  | hole     | 41.95%                                                   | 3.93%             | 27.05%             | 27.06%             | 1→2<br>0.000                             | 1→3<br>0.204 | 1→4<br>0.204 | 2→3<br>0.018 |
|                 | electron | 1.02%                                                    | 0.27%             | 49.33%             | 49.35%             | 2→4<br>0.018                             | 3→4<br>0.000 |              |              |
| S <sub>5</sub>  | hole     | 41.16%                                                   | 45.16%            | 6.79%              | 6.79%              | 1→2<br>0.018                             | 1→3<br>0.191 | 1→4<br>0.191 | 2→3<br>0.212 |
|                 | electron | 4.65%                                                    | 0.96%             | 47.18%             | 47.19%             | 2→4<br>0.212                             | 3→4<br>0.000 |              |              |
| S <sub>9</sub>  | hole     | 56.59%                                                   | 4.97%             | 19.14%             | 19.22%             | 1→2<br>0.002                             | 1→3<br>0.262 | 1→4<br>0.262 | 2→3<br>0.023 |
|                 | electron | 4.12%                                                    | 0.34%             | 47.75%             | 47.77%             | 2→4<br>0.023                             | 3→4<br>0.000 |              |              |
| S <sub>31</sub> | hole     | 8.61%                                                    | 58.53%            | 16.21%             | 16.43%             | 1→2                                      | 1→3          | 1→4          | 2→3          |

|  |          |       |       |        |        |              |              |       |       |
|--|----------|-------|-------|--------|--------|--------------|--------------|-------|-------|
|  |          |       |       |        |        | 0.024        | 0.034        | 0.034 | 0.275 |
|  | electron | 4.40% | 0.94% | 47.30% | 47.33% | 2→4<br>0.275 | 3→4<br>0.000 |       |       |

| D1              |          | Contribution of each fragment<br>to hole and electron |                    |                    |                    |                    |                     | Transferred electron between fragment |               |               |               |               |
|-----------------|----------|-------------------------------------------------------|--------------------|--------------------|--------------------|--------------------|---------------------|---------------------------------------|---------------|---------------|---------------|---------------|
|                 |          | Ligand 1<br>(Ir center)                               | Ligand2<br>(acac1) | Ligand 3<br>(ppd1) | Ligand 4<br>(ppd2) | Ligand 5<br>(ppd3) | Ligand 6<br>(acac2) |                                       |               |               |               |               |
| S <sub>1</sub>  | hole     | 42.23%                                                | 1.90%              | 14.54%             | 23.50%             | 16.69%             | 2.14%               | 1→2<br>0.000                          | 1→3<br>0.001  | 1→4<br>0.365  | 1→5<br>0.003  | 1→6<br>0.001  |
|                 | electron | 5.05%                                                 | 0.47%              | 1.44%              | 91.36%             | 1.22%              | 0.46%               | 2→3<br>0.000                          | 2→4<br>0.016  | 2→5<br>0.000  | 2→6<br>0.000  | 3→4<br>0.129  |
|                 |          |                                                       |                    |                    |                    |                    |                     | 3→5<br>0.000                          | 3→6<br>0.000  | 4→5<br>-0.150 | 4→6<br>0.019  | 5→6<br>0.000  |
| S <sub>2</sub>  | hole     | 40.63%                                                | 2.00%              | 9.83%              | 36.25%             | 9.35%              | 1.94%               | 1→2<br>0.000                          | 1→3<br>0.113  | 1→4<br>0.194  | 1→5<br>0.059  | 1→6<br>0.000  |
|                 | electron | 3.99%                                                 | 0.18%              | 28.74%             | 51.40%             | 15.56%             | 0.12%               | 2→3<br>0.000                          | 2→4<br>0.000  | 2→5<br>0.003  | 2→6<br>0.000  | 3→4<br>-0.053 |
|                 |          |                                                       |                    |                    |                    |                    |                     | 3→5<br>0.012                          | 3→6<br>0.005  | 4→5<br>0.008  | 4→6<br>0.010  | 5→6<br>0.003  |
| S <sub>15</sub> | hole     | 38.69%                                                | 24.69%             | 5.02%              | 6.00%              | 3.98%              | 21.62%              | 1→2<br>0.009                          | 1→3<br>0.119  | 1→4<br>0.145  | 1→5<br>0.099  | 1→6<br>0.008  |
|                 | electron | 4.17%                                                 | 0.22%              | 31.27%             | 38.21%             | 25.94%             | 0.20%               | 2→3<br>0.077                          | 2→4<br>0.094  | 2→5<br>0.063  | 2→6<br>0.000  | 3→4<br>0.004  |
|                 |          |                                                       |                    |                    |                    |                    |                     | 3→5<br>0.000                          | 3→6<br>-0.067 | 4→5<br>0.000  | 4→6<br>-0.083 | 5→6<br>-0.056 |
| S <sub>24</sub> | hole     | 40.14%                                                | 4.97%              | 12.51%             | 13.11%             | 19.92%             | 9.35%               | 1→2<br>0.000                          | 1→3<br>0.003  | 1→4<br>0.363  | 1→5<br>0.006  | 1→6<br>0.003  |
|                 | electron | 5.06%                                                 | 0.47%              | 0.96%              | 92.09%             | 0.96%              | 0.46%               | 2→3<br>0.000                          | 2→4<br>-0.045 | 2→5<br>0.000  | 2→6<br>0.000  | 3→4<br>-0.114 |
|                 |          |                                                       |                    |                    |                    |                    |                     | 3→5<br>0.000                          | 3→6<br>0.000  | 4→5<br>0.182  | 4→6<br>0.085  | 5→6<br>0.000  |
| S <sub>31</sub> | hole     | 40.84%                                                | 3.03%              | 21.37%             | 25.65%             | 8.14%              | 0.97%               | 1→2<br>0.004                          | 1→3<br>0.004  | 1→4<br>0.003  | 1→5<br>0.001  | 1→6<br>0.387  |
|                 | electron | 2.25%                                                 | 1.28%              | 0.24%              | 0.67%              | 0.79%              | 94.77%              | 2→3<br>0.003                          | 2→4<br>0.003  | 2→5<br>0.000  | 2→6<br>-0.029 | 3→4<br>0.000  |
|                 |          |                                                       |                    |                    |                    |                    |                     | 3→5<br>0.001                          | 3→6<br>0.203  | 4→5<br>0.001  | 4→6<br>0.243  | 5→6<br>0.077  |
| S <sub>76</sub> | hole     | 17.26%                                                | 3.73%              | 30.96%             | 37.59%             | 5.92%              | 4.55%               | 1→2<br>0.051                          | 1→3<br>0.003  | 1→4<br>0.004  | 1→5<br>0.003  | 1→6<br>0.010  |
|                 | electron | 2.61%                                                 | 29.95%             | 2.86%              | 3.18%              | 2.90%              | 58.50%              | 2→3<br>-0.092                         | 2→4<br>-0.111 | 2→5<br>0.017  | 2→6<br>0.008  | 3→4<br>0.001  |
|                 |          |                                                       |                    |                    |                    |                    |                     | 3→5<br>0.007                          | 3→6<br>0.180  | 4→5<br>0.009  | 4→6<br>0.218  | 5→6<br>-0.033 |

| D2  |          | Contribution of each fragment<br>to hole and electron |                    |                    |                    |                    |                     | Transferred electron between fragment |               |               |               |               |
|-----|----------|-------------------------------------------------------|--------------------|--------------------|--------------------|--------------------|---------------------|---------------------------------------|---------------|---------------|---------------|---------------|
|     |          | Ligand 1<br>(Ir center)                               | Ligand2<br>(acac1) | Ligand 3<br>(ppd1) | Ligand 4<br>(ppd2) | Ligand 5<br>(ppd3) | Ligand 6<br>(acac2) |                                       |               |               |               |               |
| S1  | hole     | 40.72%                                                | 1.87%              | 39.22%             | 25.69%             | 0.75%              | 1.70%               | 1→2<br>0.000                          | 1→3<br>0.064  | 1→4<br>0.339  | 1→5<br>0.004  | 1→6<br>0.001  |
|     | electron | 4.97%                                                 | 0.35%              | 20.61%             | 86.39%             | 1.01%              | 0.37%               | 2→3<br>0.003                          | 2→4<br>0.015  | 2→5<br>0.000  | 2→6<br>0.000  | 3→4<br>0.286  |
|     |          |                                                       |                    |                    |                    |                    |                     | 3→5<br>0.002                          | 3→6<br>-0.002 | 4→5<br>-0.004 | 4→6<br>-0.014 | 5→6<br>0.000  |
| S3  | hole     | 40.18%                                                | 1.93%              | 6.40%              | 37.26%             | 11.64%             | 2.59%               | 1→2<br>0.000                          | 1→3<br>0.008  | 1→4<br>0.074  | 1→5<br>0.278  | 1→6<br>0.001  |
|     | electron | 4.05%                                                 | 0.08%              | 2.71%              | 22.14%             | 70.47%             | 0.49%               | 2→3<br>0.000                          | 2→4<br>0.004  | 2→5<br>0.014  | 2→6<br>0.000  | 3→4<br>0.004  |
|     |          |                                                       |                    |                    |                    |                    |                     | 3→5<br>0.042                          | 3→6<br>0.000  | 4→5<br>0.237  | 4→6<br>-0.004 | 5→6<br>-0.018 |
| S9  | hole     | 40.69%                                                | 2.52%              | 16.98%             | 25.02%             | 13.05%             | 1.74%               | 1→2<br>-0.001                         | 1→3<br>0.012  | 1→4<br>0.108  | 1→5<br>0.247  | 1→6<br>0.001  |
|     | electron | 3.91%                                                 | 0.08%              | 4.64%              | 28.99%             | 61.91%             | 0.40%               | 2→3<br>0.001                          | 2→4<br>0.007  | 2→5<br>0.016  | 2→6<br>0.000  | 3→4<br>0.038  |
|     |          |                                                       |                    |                    |                    |                    |                     | 3→5<br>0.099                          | 3→6<br>0.000  | 4→5<br>0.117  | 4→6<br>-0.004 | 5→6<br>-0.010 |
| S31 | hole     | 40.26%                                                | 3.32%              | 24.61%             | 15.04%             | 14.60%             | 2.17%               | 1→2<br>0.042                          | 1→3<br>-0.001 | 1→4<br>0.0063 | 1→5<br>0.209  | 1→6<br>0.053  |
|     | electron | 3.62%                                                 | 10.87%             | 2.03%              | 16.97%             | 53.16%             | 13.36%              | 2→3<br>0.026                          | 2→4<br>0.011  | 2→5<br>0.002  | 2→6<br>0.002  | 3→4<br>0.039  |
|     |          |                                                       |                    |                    |                    |                    |                     | 3→5<br>0.012                          | 3→6<br>0.032  | 4→5<br>0.055  | 4→6<br>0.016  | 5→6<br>0.008  |
| S84 | hole     | 21.17%                                                | 12.43%             | 16.72%             | 24.29%             | 13.59%             | 11.80%              | 1→2<br>0.058                          | 1→3<br>0.023  | 1→4<br>0.025  | 1→5<br>0.015  | 1→6<br>0.058  |
|     | electron | 3.24%                                                 | 29.34%             | 13.30%             | 15.76%             | 9.05%              | 29.30%              | 2→3<br>0.033                          | 2→4<br>-0.052 | 2→5<br>-0.029 | 2→6<br>-0.002 | 3→4<br>0.006  |
|     |          |                                                       |                    |                    |                    |                    |                     | 3→5<br>-0.003                         | 3→6<br>0.033  | 4→5<br>0.001  | 4→6<br>0.053  | 5→6<br>0.029  |

**Table S5.** The cartesian coordinates for all of optimized  $T_1$  state and  $^3MC$  state.

|    | M1- $^3MC_1$ |           |           |    | M1- $^3MC_1$ |              |              |
|----|--------------|-----------|-----------|----|--------------|--------------|--------------|
| 77 | 0.831449     | -0.109123 | -0.231535 | 77 | 0.846114000  | -0.125204000 | -0.225119000 |
| 7  | 1.194052     | 3.69822   | -2.29718  | 7  | 1.181301000  | 3.557826000  | -2.512199000 |
| 7  | 1.595453     | 1.449587  | -1.68121  | 7  | 1.602708000  | 1.353003000  | -1.764490000 |
| 7  | 0.840362     | -1.4664   | 1.890011  | 7  | 0.829138000  | -1.359987000 | 1.971265000  |

|   |           |           |           |   |              |              |              |
|---|-----------|-----------|-----------|---|--------------|--------------|--------------|
| 8 | 2.227801  | -1.661257 | -0.836879 | 7 | -0.322903000 | -3.207734000 | 2.903524000  |
| 8 | 2.496645  | 0.785224  | 0.91141   | 8 | 2.519292000  | 0.812812000  | 0.861005000  |
| 6 | 4.174478  | -2.937708 | -1.048158 | 8 | 2.229712000  | -1.718855000 | -0.745342000 |
| 1 | 3.763528  | -3.830645 | -0.567553 | 6 | 2.531825000  | 1.192631000  | -2.700956000 |
| 1 | 5.248842  | -2.898997 | -0.865578 | 1 | 3.035858000  | 0.230674000  | -2.716476000 |
| 1 | 3.985201  | -3.037963 | -2.119839 | 6 | 2.831802000  | 2.206905000  | -3.592143000 |
| 6 | 3.4458    | -1.727495 | -0.522433 | 1 | 3.586678000  | 2.088102000  | -4.358632000 |
| 6 | 4.171568  | -0.796754 | 0.248565  | 6 | 2.113306000  | 3.388920000  | -3.437577000 |
| 1 | 5.22816   | -1.000146 | 0.370398  | 1 | 2.297422000  | 4.239092000  | -4.091235000 |
| 6 | 3.691221  | 0.361716  | 0.874181  | 6 | 0.935534000  | 2.529709000  | -1.693354000 |
| 6 | 4.678279  | 1.234139  | 1.609273  | 6 | -0.090470000 | 2.612412000  | -0.669000000 |
| 1 | 4.712867  | 2.21351   | 1.12306   | 6 | -0.327832000 | 1.467389000  | 0.121816000  |
| 1 | 5.682792  | 0.810635  | 1.635576  | 6 | -1.324399000 | 1.563064000  | 1.100718000  |
| 1 | 4.323837  | 1.402481  | 2.62994   | 1 | -1.518496000 | 0.687872000  | 1.708492000  |
| 6 | 1.536155  | -2.427331 | 3.937793  | 6 | -2.066534000 | 2.723527000  | 1.310955000  |
| 1 | 2.186811  | -2.429863 | 4.803156  | 6 | -1.797716000 | 3.840811000  | 0.501146000  |
| 6 | 1.639705  | -1.463318 | 2.946969  | 1 | -2.358564000 | 4.759622000  | 0.637773000  |
| 1 | 2.369429  | -0.660909 | 2.991142  | 6 | -0.825580000 | 3.787886000  | -0.474387000 |
| 6 | -0.098435 | -2.423536 | 1.803876  | 6 | -3.160788000 | 2.813696000  | 2.374687000  |
| 6 | -0.983525 | -2.343912 | 0.646776  | 6 | -2.828249000 | 3.951151000  | 3.352592000  |
| 6 | -0.783376 | -1.310554 | -0.288594 | 1 | -2.761183000 | 4.917310000  | 2.845807000  |
| 6 | -2.745188 | -2.104594 | -1.528937 | 1 | -1.871952000 | 3.767456000  | 3.851198000  |
| 6 | -3.688515 | -1.919662 | -2.717618 | 1 | -3.605407000 | 4.028862000  | 4.120542000  |
| 6 | -4.370102 | -0.546359 | -2.615857 | 6 | -4.504933000 | 3.106500000  | 1.690056000  |
| 1 | -5.048819 | -0.397846 | -3.462594 | 1 | -5.303110000 | 3.176682000  | 2.436907000  |
| 1 | -4.951996 | -0.468729 | -1.692697 | 1 | -4.763384000 | 2.308639000  | 0.987586000  |
| 6 | -2.882766 | -1.994364 | -4.023392 | 1 | -4.480618000 | 4.047608000  | 1.134434000  |
| 1 | -2.387755 | -2.965154 | -4.120182 | 6 | -3.305139000 | 1.520255000  | 3.178022000  |
| 1 | -2.112805 | -1.220016 | -4.067979 | 1 | -4.095582000 | 1.640958000  | 3.925172000  |
| 1 | -3.545735 | -1.859955 | -4.884812 | 1 | -2.381915000 | 1.268288000  | 3.708238000  |
| 6 | 2.534316  | 1.341263  | -2.615776 | 1 | -3.575737000 | 0.673386000  | 2.540921000  |
| 1 | 3.033113  | 0.379099  | -2.685392 | 6 | 1.616967000  | -1.300847000 | 3.034824000  |
| 6 | 2.84996   | 2.406661  | -3.439208 | 1 | 2.361211000  | -0.510454000 | 3.034307000  |
| 1 | 3.612951  | 2.330616  | -4.203081 | 6 | 1.485321000  | -2.195331000 | 4.085939000  |
| 6 | 2.135917  | 3.581205  | -3.220479 | 1 | 2.126513000  | -2.152039000 | 4.957279000  |
| 1 | 2.331987  | 4.468893  | -3.818406 | 6 | 0.481783000  | -3.147237000 | 3.954819000  |
| 6 | 0.933962  | 2.623519  | -1.545583 | 1 | 0.313769000  | -3.891451000 | 4.730727000  |
| 6 | -0.102937 | 2.649776  | -0.52835  | 6 | -0.126105000 | -2.304316000 | 1.936859000  |
| 6 | -0.35072  | 1.458854  | 0.195599  | 6 | -0.997181000 | -2.286191000 | 0.767117000  |
| 6 | -2.099097 | 2.658561  | 1.432728  | 6 | -2.061792000 | -3.184409000 | 0.647838000  |
| 6 | -1.821236 | 3.815655  | 0.693976  | 1 | -2.209300000 | -3.919380000 | 1.431956000  |
| 6 | -0.835159 | 3.811246  | -0.275689 | 6 | -2.904860000 | -3.129037000 | -0.443333000 |
| 1 | -0.61456  | 4.704417  | -0.850829 | 1 | -3.723355000 | -3.838321000 | -0.510755000 |

|   |           |           |           |   |              |              |              |
|---|-----------|-----------|-----------|---|--------------|--------------|--------------|
| 6 | -4.243829 | 1.571398  | 2.114175  | 6 | -2.727812000 | -2.161243000 | -1.443577000 |
| 1 | -4.711856 | 1.832566  | 1.160266  | 6 | -1.670297000 | -1.262540000 | -1.303239000 |
| 1 | -5.027849 | 1.520774  | 2.877591  | 1 | -1.533593000 | -0.486463000 | -2.047879000 |
| 1 | -3.80845  | 0.574649  | 2.009446  | 6 | -0.775101000 | -1.319389000 | -0.226532000 |
| 6 | -3.887939 | 3.964241  | 2.681903  | 6 | -3.699492000 | -2.106046000 | -2.622090000 |
| 1 | -4.385446 | 4.285616  | 1.761951  | 6 | -3.668804000 | -3.449301000 | -3.367080000 |
| 1 | -3.188135 | 4.748307  | 2.986792  | 1 | -4.366417000 | -3.429180000 | -4.211098000 |
| 1 | -4.652528 | 3.880748  | 3.460109  | 1 | -3.953409000 | -4.280744000 | -2.717255000 |
| 6 | -3.187227 | 2.615883  | 2.506748  | 1 | -2.667169000 | -3.655736000 | -3.755556000 |
| 6 | -2.558925 | 2.224382  | 3.85293   | 6 | -5.118750000 | -1.847192000 | -2.093763000 |
| 1 | -3.327485 | 2.190308  | 4.63271   | 1 | -5.166274000 | -0.892949000 | -1.560910000 |
| 1 | -1.798731 | 2.951719  | 4.153184  | 1 | -5.444206000 | -2.631687000 | -1.405675000 |
| 1 | -2.08284  | 1.241928  | 3.806221  | 1 | -5.831341000 | -1.811491000 | -2.924729000 |
| 7 | -0.268598 | -3.391585 | 2.711097  | 6 | -3.350117000 | -0.998939000 | -3.618199000 |
| 6 | 0.547585  | -3.386273 | 3.755158  | 1 | -4.070672000 | -1.008569000 | -4.441643000 |
| 1 | 0.401606  | -4.182915 | 4.481891  | 1 | -2.353644000 | -1.140238000 | -4.047405000 |
| 6 | -2.898214 | -3.133143 | -0.594858 | 1 | -3.388687000 | -0.008262000 | -3.155874000 |
| 1 | -3.643037 | 0.269509  | -2.619986 | 6 | 4.159766000  | -3.031046000 | -0.877441000 |
| 6 | -4.777988 | -2.992701 | -2.767357 | 1 | 3.740075000  | -3.889589000 | -0.344477000 |
| 1 | -4.354555 | -3.997213 | -2.862396 | 1 | 5.234762000  | -2.993418000 | -0.698357000 |
| 1 | -5.413251 | -2.96934  | -1.876792 | 1 | 3.967497000  | -3.192051000 | -1.941092000 |
| 1 | -5.419993 | -2.819988 | -3.636292 | 6 | 3.445379000  | -1.784257000 | -0.422666000 |
| 1 | -2.37623  | 4.728282  | 0.872838  | 6 | 4.179978000  | -0.821883000 | 0.299563000  |
| 1 | -3.704416 | -3.849691 | -0.693527 | 1 | 5.233521000  | -1.030385000 | 0.437862000  |
| 6 | -1.354676 | 1.505963  | 1.162985  | 6 | 3.709754000  | 0.375304000  | 0.854842000  |
| 1 | -1.563224 | 0.599721  | 1.722923  | 6 | 4.702182000  | 1.279259000  | 1.542735000  |
| 6 | -1.693145 | -1.200043 | -1.341631 | 1 | 4.749267000  | 2.227885000  | 0.999923000  |
| 1 | -1.581822 | -0.375121 | -2.039697 | 1 | 5.702081000  | 0.847858000  | 1.598969000  |
| 6 | -2.035949 | -3.243243 | 0.48363   | 1 | 4.344838000  | 1.510892000  | 2.549880000  |
| 1 | -2.165622 | -4.02813  | 1.221251  | 1 | -0.613841000 | 4.647251000  | -1.101878000 |

| D1-3MC1 |          |           |           | D1-3MC2 |           |           |           |
|---------|----------|-----------|-----------|---------|-----------|-----------|-----------|
| 77      | 2.850041 | 0.789182  | -0.092544 | 77      | -2.802592 | -0.563459 | -0.399586 |
| 7       | 6.717063 | -0.078415 | 1.703049  | 7       | -5.819457 | -0.724083 | 2.505959  |
| 7       | 4.802518 | 1.119056  | 0.997985  | 7       | -4.109357 | -1.320699 | 0.975184  |
| 7       | 0.824542 | 0.780336  | -1.946624 | 7       | -1.452919 | 0.257861  | -1.700032 |
| 8       | 2.306358 | 2.884754  | -0.190451 | 8       | -2.193267 | -2.525437 | -1.137265 |
| 8       | 4.027610 | 1.118906  | -1.873971 | 8       | -4.399457 | -0.663106 | -1.883465 |
| 6       | 1.979114 | 5.050641  | -1.015537 | 6       | -2.067276 | -4.479678 | -2.415299 |
| 1       | 0.891983 | 4.983408  | -1.122036 | 1       | -1.061790 | -4.271437 | -2.793250 |
| 1       | 2.365671 | 5.745002  | -1.762297 | 1       | -2.616190 | -5.057631 | -3.159488 |
| 1       | 2.176091 | 5.438399  | -0.013267 | 1       | -1.944898 | -5.074085 | -1.505891 |
| 6       | 2.568610 | 3.669947  | -1.141680 | 6       | -2.741191 | -3.175050 | -2.073633 |

---

|   |           |           |           |   |           |           |           |
|---|-----------|-----------|-----------|---|-----------|-----------|-----------|
| 6 | 3.349465  | 3.379635  | -2.277483 | 6 | -3.885875 | -2.808389 | -2.799994 |
| 1 | 3.484356  | 4.186971  | -2.986501 | 1 | -4.227168 | -3.512724 | -3.548209 |
| 6 | 4.032391  | 2.188261  | -2.555928 | 6 | -4.634794 | -1.627905 | -2.665020 |
| 6 | 4.895362  | 2.127558  | -3.790078 | 6 | -5.853466 | -1.451328 | -3.535062 |
| 1 | 5.928579  | 1.930332  | -3.490910 | 1 | -6.736262 | -1.368538 | -2.894534 |
| 1 | 4.859625  | 3.045485  | -4.377745 | 1 | -5.995434 | -2.272728 | -4.238072 |
| 1 | 4.579031  | 1.282412  | -4.407846 | 1 | -5.772343 | -0.509782 | -4.085126 |
| 6 | -0.683281 | 1.097068  | -3.759648 | 6 | -0.656062 | 1.118032  | -3.754021 |
| 1 | -0.871564 | 1.406130  | -4.779358 | 1 | -0.839371 | 1.430488  | -4.773608 |
| 6 | 0.588018  | 1.144589  | -3.197811 | 6 | -1.681205 | 0.641903  | -2.955070 |
| 1 | 1.444956  | 1.494877  | -3.766646 | 1 | -2.708038 | 0.555742  | -3.293155 |
| 6 | -0.200593 | 0.347471  | -1.210560 | 6 | -0.186020 | 0.359668  | -1.205417 |
| 6 | -0.038002 | -0.033043 | 0.160846  | 6 | -0.029005 | -0.026620 | 0.165338  |
| 6 | 1.213942  | 0.034588  | 0.805920  | 6 | -1.210376 | -0.469235 | 0.808077  |
| 6 | 0.108259  | -0.757460 | 2.838899  | 6 | 0.112436  | -0.763697 | 2.839692  |
| 6 | 0.238393  | -1.139952 | 4.314997  | 6 | 0.152730  | -1.168585 | 4.315436  |
| 6 | 1.197093  | -2.333268 | 4.448830  | 6 | -0.762366 | -0.231512 | 5.118764  |
| 1 | 1.307190  | -2.612811 | 5.502272  | 1 | -0.750717 | -0.509009 | 6.178534  |
| 1 | 0.814916  | -3.200645 | 3.902449  | 1 | -0.426419 | 0.805957  | 5.032517  |
| 6 | 0.797941  | 0.056900  | 5.099204  | 6 | -0.342328 | -2.615736 | 4.461485  |
| 1 | 0.131338  | 0.920321  | 5.016394  | 1 | 0.293395  | -3.302090 | 3.894386  |
| 1 | 1.781814  | 0.357510  | 4.730516  | 1 | -1.367308 | -2.732264 | 4.100243  |
| 1 | 0.898427  | -0.199284 | 6.159550  | 1 | -0.320043 | -2.917912 | 5.514194  |
| 6 | 5.297713  | 2.245826  | 1.499437  | 6 | -4.280786 | -2.611590 | 1.262431  |
| 1 | 4.681747  | 3.132858  | 1.380676  | 1 | -3.628344 | -3.300305 | 0.737142  |
| 6 | 6.527880  | 2.266805  | 2.130152  | 6 | -5.232552 | -3.014543 | 2.180358  |
| 1 | 6.941557  | 3.177249  | 2.544173  | 1 | -5.375333 | -4.060534 | 2.417926  |
| 6 | 7.202544  | 1.050388  | 2.195425  | 6 | -5.989339 | -2.010536 | 2.774476  |
| 1 | 8.180510  | 0.984200  | 2.667878  | 1 | -6.763008 | -2.251305 | 3.500077  |
| 6 | 5.516449  | -0.024911 | 1.115840  | 6 | -4.881826 | -0.397627 | 1.618483  |
| 6 | 4.887209  | -1.214328 | 0.572003  | 6 | -4.571317 | 0.971791  | 1.276512  |
| 6 | 3.603763  | -1.073903 | -0.004954 | 6 | -3.523052 | 1.142768  | 0.342977  |
| 6 | 3.622163  | -3.481472 | -0.470648 | 6 | -3.791270 | 3.563636  | 0.606649  |
| 6 | 4.896092  | -3.578070 | 0.104849  | 6 | -4.841877 | 3.347103  | 1.508925  |
| 6 | 5.520958  | -2.457988 | 0.621391  | 6 | -5.226309 | 2.061846  | 1.847046  |
| 1 | 6.506653  | -2.525603 | 1.069833  | 1 | -6.029169 | 1.884913  | 2.555527  |
| 6 | 1.574407  | -4.895719 | -0.252462 | 6 | -1.859361 | 5.135991  | 0.730830  |
| 1 | 1.780884  | -5.070078 | 0.807787  | 1 | -1.801678 | 5.031156  | 1.818150  |
| 1 | 1.033384  | -5.765270 | -0.642564 | 1 | -1.481305 | 6.128908  | 0.462172  |
| 1 | 0.915943  | -4.026416 | -0.325798 | 1 | -1.195524 | 4.385631  | 0.293991  |
| 6 | 3.705037  | -5.980639 | -0.931678 | 6 | -4.157910 | 6.066438  | 0.884726  |
| 1 | 3.937570  | -6.231513 | 0.107602  | 1 | -4.123873 | 6.020722  | 1.977139  |
| 1 | 4.645539  | -5.907527 | -1.486435 | 1 | -5.204084 | 6.005022  | 0.569677  |
| 1 | 3.135262  | -6.814323 | -1.353321 | 1 | -3.776667 | 7.047102  | 0.584002  |

---



---

|    |           |           |           |    |           |           |           |
|----|-----------|-----------|-----------|----|-----------|-----------|-----------|
| 6  | 2.882337  | -4.695176 | -1.034657 | 6  | -3.306958 | 4.968750  | 0.243134  |
| 6  | 2.557091  | -4.452098 | -2.516347 | 6  | -3.358896 | 5.157584  | -1.280473 |
| 1  | 2.023665  | -5.314435 | -2.931412 | 1  | -3.017494 | 6.163590  | -1.547375 |
| 1  | 3.472227  | -4.304098 | -3.097494 | 1  | -4.379922 | 5.032682  | -1.653061 |
| 1  | 1.928559  | -3.568338 | -2.651712 | 1  | -2.722211 | 4.438345  | -1.801563 |
| 77 | -2.812683 | -0.571062 | -0.387736 | 77 | 2.859554  | 0.788606  | -0.075622 |
| 7  | -5.826146 | -0.719942 | 2.522006  | 7  | 6.725617  | -0.107182 | 1.705914  |
| 7  | -4.115727 | -1.322736 | 0.994130  | 7  | 4.816241  | 1.103288  | 1.009368  |
| 7  | -1.470177 | 0.244988  | -1.698549 | 7  | 0.842364  | 0.796766  | -1.934251 |
| 8  | -2.208247 | -2.535747 | -1.120778 | 8  | 2.326654  | 2.887532  | -0.161738 |
| 8  | -4.418009 | -0.676991 | -1.862448 | 8  | 4.035638  | 1.121091  | -1.858237 |
| 6  | -2.084244 | -4.492059 | -2.395617 | 6  | 2.012621  | 5.060438  | -0.972820 |
| 1  | -1.961449 | -5.085805 | -1.485816 | 1  | 2.221952  | 5.444843  | 0.028307  |
| 1  | -2.633394 | -5.070725 | -3.139070 | 1  | 2.395396  | 5.754729  | -1.721571 |
| 1  | -1.078934 | -4.283896 | -2.774061 | 1  | 0.924153  | 4.999027  | -1.068021 |
| 6  | -2.758217 | -3.187311 | -2.054640 | 6  | 2.593721  | 3.677053  | -1.108014 |
| 6  | -3.905127 | -2.822633 | -2.778372 | 6  | 3.373300  | 3.389445  | -2.245393 |
| 1  | -4.248019 | -3.528252 | -3.524637 | 1  | 3.513485  | 4.200622  | -2.948968 |
| 6  | -4.655100 | -1.642950 | -2.642006 | 6  | 4.048372  | 2.195545  | -2.532034 |
| 6  | -5.877246 | -1.468947 | -3.507657 | 6  | 4.911724  | 2.138049  | -3.766099 |
| 1  | -5.798858 | -0.528446 | -4.059917 | 1  | 4.591810  | 1.298113  | -4.389085 |
| 1  | -6.021360 | -2.291825 | -4.208494 | 1  | 4.880791  | 3.059677  | -4.348209 |
| 1  | -6.757610 | -1.385435 | -2.863897 | 1  | 5.943826  | 1.934155  | -3.467506 |
| 6  | -1.704650 | 0.624622  | -2.953689 | 6  | 0.612213  | 1.165073  | -3.185456 |
| 1  | -2.733254 | 0.538031  | -3.286230 | 1  | 1.471740  | 1.518338  | -3.748461 |
| 6  | -1.213893 | -0.471021 | 0.808954  | 6  | 1.216978  | 0.038258  | 0.813772  |
| 6  | -1.111373 | -0.805233 | 2.161751  | 6  | 1.265806  | -0.373920 | 2.148078  |
| 1  | 2.190391  | -2.104594 | 4.055091  | 1  | -1.796727 | -0.275780 | 4.769025  |
| 6  | -1.101553 | -1.531721 | 4.940681  | 6  | 1.559574  | -1.086734 | 4.910934  |
| 1  | -1.827024 | -0.714240 | 4.891871  | 1  | 2.257486  | -1.756466 | 4.399920  |
| 1  | -1.537468 | -2.408309 | 4.451915  | 1  | 1.960935  | -0.070008 | 4.863841  |
| 1  | -0.951632 | -1.781276 | 5.995613  | 1  | 1.526671  | -1.381563 | 5.964273  |
| 6  | -4.288302 | -2.612554 | 1.285350  | 6  | 5.318321  | 2.225449  | 1.514352  |
| 1  | -3.636522 | -3.303393 | 0.762021  | 1  | 4.706911  | 3.116218  | 1.400202  |
| 6  | -5.240771 | -3.011824 | 2.204048  | 6  | 6.549719  | 2.237283  | 2.142812  |
| 1  | -5.384581 | -4.056918 | 2.444905  | 1  | 6.969055  | 3.143827  | 2.559679  |
| 6  | -5.996870 | -2.005374 | 2.794816  | 6  | 7.218042  | 1.017047  | 2.201838  |
| 1  | -6.770867 | -2.243243 | 3.521011  | 1  | 8.196593  | 0.943808  | 2.672024  |
| 6  | -4.888057 | -0.397148 | 1.633805  | 6  | 5.524142  | -0.045026 | 1.121486  |
| 6  | -4.576918 | 0.971019  | 1.286998  | 6  | 4.887327  | -1.228832 | 0.574245  |
| 6  | -3.529584 | 1.138350  | 0.351832  | 6  | 3.602979  | -1.079372 | 0.001532  |
| 6  | -3.793119 | 3.560188  | 0.610735  | 6  | 3.608138  | -3.484835 | -0.475123 |
| 6  | -4.843729 | 3.347308  | 1.513838  | 6  | 4.883124  | -3.590327 | 0.096321  |
| 6  | -5.229963 | 2.063397  | 1.855208  | 6  | 5.514970  | -2.475741 | 0.616307  |

---

|   |           |           |           |   |           |           |           |
|---|-----------|-----------|-----------|---|-----------|-----------|-----------|
| 1 | -6.032587 | 1.889351  | 2.564674  | 1 | 6.501526  | -2.550243 | 1.061749  |
| 6 | -3.353844 | 5.149790  | -1.278775 | 6 | 2.534953  | -4.440632 | -2.523330 |
| 1 | -4.374352 | 5.026575  | -1.653348 | 1 | 3.449863  | -4.294100 | -3.105219 |
| 1 | -3.009577 | 6.154537  | -1.546733 | 1 | 1.996886  | -5.298475 | -2.941718 |
| 1 | -2.717680 | 4.428209  | -1.797254 | 1 | 1.910343  | -3.553287 | -2.653356 |
| 6 | -4.155783 | 6.064186  | 0.882930  | 6 | 3.678278  | -5.982183 | -0.947932 |
| 1 | -5.201528 | 6.003736  | 0.566259  | 1 | 4.618023  | -5.911077 | -1.504226 |
| 1 | -4.123654 | 6.020970  | 1.975501  | 1 | 3.911678  | -6.238923 | 0.089726  |
| 1 | -3.772402 | 7.043535  | 0.580652  | 1 | 3.103692  | -6.811219 | -1.372177 |
| 6 | -3.305552 | 4.963654  | 0.245266  | 6 | 2.861465  | -4.692358 | -1.043361 |
| 6 | -1.858653 | 5.128947  | 0.735771  | 6 | 1.553951  | -4.890505 | -0.259916 |
| 1 | -1.478131 | 6.120680  | 0.466248  | 1 | 1.007986  | -5.755332 | -0.653578 |
| 1 | -1.803572 | 5.025994  | 1.823417  | 1 | 1.761376  | -5.071831 | 0.798991  |
| 1 | -1.195167 | 4.376646  | 0.301771  | 1 | 0.899489  | -4.017739 | -0.327398 |
| 1 | 5.405527  | -4.532450 | 0.155212  | 1 | -5.358649 | 4.184944  | 1.960009  |
| 1 | -5.359002 | 4.186968  | 1.963271  | 1 | 5.388031  | -4.547396 | 0.140817  |
| 1 | -2.001830 | -1.119926 | 2.692032  | 1 | 2.224424  | -0.393412 | 2.652366  |
| 6 | 3.007135  | -2.227221 | -0.511852 | 6 | -3.154281 | 2.453238  | 0.042745  |
| 1 | 2.014858  | -2.139491 | -0.942547 | 1 | -2.333007 | 2.615784  | -0.648199 |
| 6 | -3.158587 | 2.447447  | 0.048586  | 6 | 2.999069  | -2.227355 | -0.508808 |
| 1 | -2.337281 | 2.606904  | -0.642990 | 1 | 2.006012  | -2.132807 | -0.936285 |
| 6 | 1.262969  | -0.371580 | 2.136152  | 6 | -1.108587 | -0.808080 | 2.153718  |
| 1 | 2.222333  | -0.392191 | 2.643858  | 1 | -1.998615 | -1.129724 | 2.685221  |

| D1- <sup>3</sup> MC3 |           |           | D1- <sup>3</sup> MC4 |    |           |           |           |
|----------------------|-----------|-----------|----------------------|----|-----------|-----------|-----------|
| 77                   | 2.782359  | 0.625545  | -0.373859            | 77 | -2.819892 | -0.619172 | -0.255565 |
| 7                    | 6.534926  | -0.328001 | 1.823701             | 7  | -5.815856 | -0.014815 | 2.612316  |
| 7                    | 4.680382  | 0.954015  | 1.105206             | 7  | -4.142878 | -1.003152 | 1.251995  |
| 7                    | 0.852948  | 0.268226  | -2.021660            | 7  | -1.442918 | -0.150945 | -1.699466 |
| 8                    | 2.141873  | 2.674760  | -0.472082            | 8  | -2.313752 | -2.725396 | -0.551115 |
| 8                    | 4.285141  | 1.248292  | -1.811502            | 8  | -4.429548 | -0.950876 | -1.689448 |
| 6                    | 2.225569  | 5.011542  | -0.594117            | 6  | -2.345345 | -4.927841 | -1.344115 |
| 1                    | 1.321472  | 5.133406  | -1.197999            | 1  | -1.397388 | -4.897053 | -1.890206 |
| 1                    | 2.910374  | 5.831323  | -0.814913            | 1  | -3.006913 | -5.646500 | -1.829245 |
| 1                    | 1.915503  | 5.057050  | 0.452777             | 1  | -2.115847 | -5.260778 | -0.329115 |
| 6                    | 2.827681  | 3.661438  | -0.877542            | 6  | -2.929173 | -3.538295 | -1.299299 |
| 6                    | 4.041360  | 3.600055  | -1.575409            | 6  | -4.070252 | -3.279530 | -2.076151 |
| 1                    | 4.485438  | 4.542644  | -1.870207            | 1  | -4.472776 | -4.116945 | -2.632241 |
| 6                    | 4.658180  | 2.427998  | -2.050867            | 6  | -4.739030 | -2.053471 | -2.223101 |
| 6                    | 5.855506  | 2.554482  | -2.955670            | 6  | -5.957202 | -2.005509 | -3.110250 |
| 1                    | 6.687194  | 1.984491  | -2.533008            | 1  | -6.822002 | -1.711687 | -2.508430 |
| 1                    | 6.161861  | 3.589968  | -3.107345            | 1  | -6.164881 | -2.958884 | -3.597089 |
| 1                    | 5.619415  | 2.104035  | -3.924074            | 1  | -5.821859 | -1.230239 | -3.869449 |
| 6                    | -0.628470 | 0.238503  | -3.878656            | 6  | -0.604191 | 0.224662  | -3.881763 |

|    |           |           |           |    |           |           |           |
|----|-----------|-----------|-----------|----|-----------|-----------|-----------|
| 1  | -0.801870 | 0.332345  | -4.942578 | 1  | -0.773122 | 0.315076  | -4.946706 |
| 6  | 0.639614  | 0.371773  | -3.324721 | 6  | -1.649053 | -0.041121 | -3.010780 |
| 1  | 1.513887  | 0.566862  | -3.940689 | 1  | -2.675076 | -0.168776 | -3.338526 |
| 6  | -0.189983 | 0.027302  | -1.221114 | 6  | -0.177287 | 0.021700  | -1.221940 |
| 6  | -0.039362 | -0.049794 | 0.197885  | 6  | -0.031482 | -0.050139 | 0.197950  |
| 6  | 1.217997  | 0.168808  | 0.806804  | 6  | -1.222699 | -0.313145 | 0.913632  |
| 6  | 0.096252  | -0.144055 | 2.960567  | 6  | 0.099980  | -0.120632 | 2.960453  |
| 6  | 0.215502  | -0.185966 | 4.486165  | 6  | 0.127124  | -0.153332 | 4.490754  |
| 6  | 1.194873  | -1.300475 | 4.885455  | 6  | -0.810382 | 0.935185  | 5.036109  |
| 1  | 1.294640  | -1.344306 | 5.975647  | 1  | -0.806185 | 0.924271  | 6.131639  |
| 1  | 0.838588  | -2.273454 | 4.534382  | 1  | -0.489288 | 1.925950  | 4.701595  |
| 6  | 0.745028  | 1.164907  | 4.992063  | 6  | -0.349547 | -1.529535 | 4.980328  |
| 1  | 0.064559  | 1.975767  | 4.716042  | 1  | 0.301786  | -2.323013 | 4.602196  |
| 1  | 1.727750  | 1.395626  | 4.573721  | 1  | -1.368308 | -1.745909 | 4.648834  |
| 1  | 0.837269  | 1.150169  | 6.083644  | 1  | -0.335990 | -1.566426 | 6.075105  |
| 6  | 5.211476  | 2.044931  | 1.640019  | 6  | -4.353568 | -2.187627 | 1.827719  |
| 1  | 4.639437  | 2.962656  | 1.533513  | 1  | -3.730935 | -3.001304 | 1.472725  |
| 6  | 6.430893  | 2.008810  | 2.297479  | 6  | -5.308067 | -2.337511 | 2.816335  |
| 1  | 6.869146  | 2.894742  | 2.739488  | 1  | -5.482206 | -3.296319 | 3.286764  |
| 6  | 7.052667  | 0.767665  | 2.360917  | 6  | -6.025978 | -1.199558 | 3.167185  |
| 1  | 8.009855  | 0.648546  | 2.864385  | 1  | -6.800403 | -1.242010 | 3.929760  |
| 6  | 5.358038  | -0.203220 | 1.201318  | 6  | -4.876150 | 0.068606  | 1.672347  |
| 6  | 4.734556  | -1.376147 | 0.583294  | 6  | -4.523614 | 1.313660  | 1.029219  |
| 6  | 3.506205  | -1.224963 | -0.105726 | 6  | -3.476179 | 1.234633  | 0.082847  |
| 6  | 3.506631  | -3.643743 | -0.541168 | 6  | -3.684921 | 3.654545  | -0.230883 |
| 6  | 4.731181  | -3.744484 | 0.125909  | 6  | -4.731608 | 3.683569  | 0.700762  |
| 6  | 5.332444  | -2.628282 | 0.690015  | 6  | -5.145687 | 2.523857  | 1.331110  |
| 1  | 6.273527  | -2.715533 | 1.222118  | 1  | -5.948390 | 2.538309  | 2.061360  |
| 6  | 1.470129  | -5.068880 | -0.373083 | 6  | -1.715399 | 5.155741  | -0.545071 |
| 1  | 1.660392  | -5.256715 | 0.687795  | 1  | -1.617328 | 5.308448  | 0.533790  |
| 1  | 0.934657  | -5.933197 | -0.781670 | 1  | -1.330512 | 6.047030  | -1.053621 |
| 1  | 0.813801  | -4.197436 | -0.442861 | 1  | -1.082821 | 4.306363  | -0.814656 |
| 6  | 3.620133  | -6.136366 | -1.022078 | 6  | -3.987014 | 6.162002  | -0.543275 |
| 1  | 3.820971  | -6.403191 | 0.019776  | 1  | -3.920488 | 6.371052  | 0.528449  |
| 1  | 4.577336  | -6.045391 | -1.544923 | 1  | -5.043575 | 6.061464  | -0.809739 |
| 1  | 3.071967  | -6.968367 | -1.474250 | 1  | -3.591709 | 7.033057  | -1.074750 |
| 6  | 2.789050  | -4.856874 | -1.132513 | 6  | -3.183477 | 4.919144  | -0.930877 |
| 6  | 2.489381  | -4.609036 | -2.618364 | 6  | -3.288701 | 4.740461  | -2.453126 |
| 1  | 1.973662  | -5.474898 | -3.047464 | 1  | -2.932272 | 5.641436  | -2.964259 |
| 1  | 3.413328  | -4.448344 | -3.181873 | 1  | -4.325963 | 4.564499  | -2.753212 |
| 1  | 1.851839  | -3.733479 | -2.763845 | 1  | -2.690454 | 3.896154  | -2.804537 |
| 77 | -2.827862 | -0.618691 | -0.246239 | 77 | 2.788638  | 0.621351  | -0.370909 |
| 7  | -5.822316 | -0.023574 | 2.625388  | 7  | 6.534419  | -0.330653 | 1.843896  |
| 7  | -4.147670 | -1.007114 | 1.263723  | 7  | 4.686198  | 0.953529  | 1.113235  |

|   |           |           |           |   |           |           |           |
|---|-----------|-----------|-----------|---|-----------|-----------|-----------|
| 7 | -1.457494 | -0.144995 | -1.694175 | 7 | 0.869185  | 0.259668  | -2.018815 |
| 8 | -2.323737 | -2.723835 | -0.549162 | 8 | 2.152384  | 2.671806  | -0.468599 |
| 8 | -4.445021 | -0.947304 | -1.672841 | 8 | 4.293209  | 1.240933  | -1.807463 |
| 6 | -2.358505 | -4.924445 | -1.346703 | 6 | 2.242921  | 5.008379  | -0.587622 |
| 1 | -2.126482 | -5.260499 | -0.333282 | 1 | 1.935074  | 5.054645  | 0.459925  |
| 1 | -3.020980 | -5.641861 | -1.832417 | 1 | 2.928867  | 5.826826  | -0.809776 |
| 1 | -1.411808 | -4.891562 | -1.894823 | 1 | 1.337731  | 5.131846  | -1.189501 |
| 6 | -2.942663 | -3.535265 | -1.296113 | 6 | 2.841742  | 3.656998  | -0.871911 |
| 6 | -4.087702 | -3.275078 | -2.066520 | 6 | 4.056415  | 3.593012  | -1.567756 |
| 1 | -4.492909 | -4.111292 | -2.622459 | 1 | 4.503739  | 4.534708  | -1.860493 |
| 6 | -4.757266 | -2.048681 | -2.207361 | 6 | 4.670573  | 2.419858  | -2.044034 |
| 6 | -5.979973 | -1.998841 | -3.088107 | 6 | 5.870078  | 2.544136  | -2.946203 |
| 1 | -5.848134 | -1.222564 | -3.846890 | 1 | 5.635222  | 2.094588  | -3.915310 |
| 1 | -6.190622 | -2.951416 | -3.575230 | 1 | 6.179075  | 3.579005  | -3.096683 |
| 1 | -6.841480 | -1.705434 | -2.481385 | 1 | 6.699577  | 1.972175  | -2.521876 |
| 6 | -1.669337 | -0.031053 | -3.004182 | 6 | 0.661620  | 0.359059  | -3.323231 |
| 1 | -2.696654 | -0.158611 | -3.327922 | 1 | 1.538659  | 0.551705  | -3.935987 |
| 6 | -1.225019 | -0.316498 | 0.914324  | 6 | 1.221001  | 0.171521  | 0.807361  |
| 6 | -1.121901 | -0.353582 | 2.307347  | 6 | 1.250732  | 0.126655  | 2.202951  |
| 1 | 2.188472  | -1.137724 | 4.461054  | 1 | -1.840208 | 0.789803  | 4.700783  |
| 6 | -1.122713 | -0.459023 | 5.175677  | 6 | 1.525450  | 0.094774  | 5.060282  |
| 1 | -1.861436 | 0.316119  | 4.951292  | 1 | 2.240394  | -0.663502 | 4.727602  |
| 1 | -1.539549 | -1.427012 | 4.881587  | 1 | 1.910141  | 1.078218  | 4.774332  |
| 1 | -0.976989 | -0.476223 | 6.260233  | 1 | 1.485958  | 0.058555  | 6.153513  |
| 6 | -4.358077 | -2.193240 | 1.836109  | 6 | 5.217592  | 2.044704  | 1.647057  |
| 1 | -3.735039 | -3.005681 | 1.478999  | 1 | 4.648375  | 2.963520  | 1.535103  |
| 6 | -5.313103 | -2.346389 | 2.823628  | 6 | 6.434024  | 2.007776  | 2.309993  |
| 1 | -5.486988 | -3.306518 | 3.291444  | 1 | 6.872383  | 2.893985  | 2.751340  |
| 6 | -6.031811 | -1.209837 | 3.177204  | 6 | 7.052667  | 0.765465  | 2.379713  |
| 1 | -6.806523 | -1.254781 | 3.939337  | 1 | 8.007575  | 0.645664  | 2.887326  |
| 6 | -4.882172 | 0.062875  | 1.686240  | 6 | 5.360282  | -0.205014 | 1.216590  |
| 6 | -4.531054 | 1.309840  | 1.045819  | 6 | 4.735954  | -1.379108 | 0.601367  |
| 6 | -3.484276 | 1.234116  | 0.098542  | 6 | 3.508911  | -1.228970 | -0.090117 |
| 6 | -3.696014 | 3.654314  | -0.210234 | 6 | 3.506475  | -3.649528 | -0.516060 |
| 6 | -4.742016 | 3.680181  | 0.722217  | 6 | 4.730202  | -3.749206 | 0.152624  |
| 6 | -5.154238 | 2.518683  | 1.350622  | 6 | 5.331947  | -2.631647 | 0.713566  |
| 1 | -5.956551 | 2.530673  | 2.081348  | 1 | 6.272130  | -2.718084 | 1.247381  |
| 6 | -3.304409 | 4.744098  | -2.431214 | 6 | 2.487994  | -4.620280 | -2.590193 |
| 1 | -4.341896 | 4.567288  | -2.730030 | 1 | 3.411737  | -4.461187 | -3.154491 |
| 1 | -2.949834 | 5.646248  | -2.941558 | 1 | 1.972130  | -5.487352 | -3.016660 |
| 1 | -2.705635 | 3.901019  | -2.784676 | 1 | 1.850361  | -3.745170 | -2.737931 |
| 6 | -4.001811 | 6.161870  | -0.518214 | 6 | 3.618822  | -6.143461 | -0.990105 |
| 1 | -5.058582 | 6.060392  | -0.783496 | 1 | 4.576086  | -6.054056 | -1.513112 |
| 1 | -3.934180 | 6.369312  | 0.553758  | 1 | 3.819514  | -6.407834 | 0.052402  |

|   |           |           |           |   |           |           |           |
|---|-----------|-----------|-----------|---|-----------|-----------|-----------|
| 1 | -3.608318 | 7.034279  | -1.048809 | 1 | 3.070401  | -6.976398 | -1.440241 |
| 6 | -3.197170 | 4.920687  | -0.908842 | 6 | 2.788146  | -4.863978 | -1.103747 |
| 6 | -1.728848 | 5.158598  | -0.524887 | 6 | 1.469452  | -5.073296 | -0.343210 |
| 1 | -1.345786 | 6.051025  | -1.032799 | 1 | 0.933277  | -5.938312 | -0.749369 |
| 1 | -1.629325 | 5.310050  | 0.554021  | 1 | 1.660056  | -5.258682 | 0.718036  |
| 1 | -1.095582 | 4.310411  | -0.796553 | 1 | 0.813573  | -4.201666 | -0.414904 |
| 1 | 5.224188  | -4.704433 | 0.221975  | 1 | -5.224427 | 4.616921  | 0.942311  |
| 1 | -5.235960 | 4.612428  | 0.965762  | 1 | 5.222094  | -4.709336 | 0.252625  |
| 1 | -2.012895 | -0.542492 | 2.893120  | 1 | 2.198742  | 0.288947  | 2.701505  |
| 6 | 2.916035  | -2.379490 | -0.628335 | 6 | -3.076256 | 2.427784  | -0.516594 |
| 1 | 1.953325  | -2.277227 | -1.119307 | 1 | -2.257838 | 2.403492  | -1.229512 |
| 6 | -3.085882 | 2.428865  | -0.498614 | 6 | 2.917287  | -2.384950 | -0.608018 |
| 1 | -2.267900 | 2.406845  | -1.212095 | 1 | 1.954849  | -2.283591 | -1.099717 |
| 6 | 1.247662  | 0.111816  | 2.196547  | 6 | -1.119908 | -0.338067 | 2.301172  |
| 1 | 2.196663  | 0.268243  | 2.700353  | 1 | -2.010493 | -0.520483 | 2.894344  |

| D2- <sup>3</sup> MC1 |           |           |           | D2- <sup>3</sup> MC2 |           |           |           |
|----------------------|-----------|-----------|-----------|----------------------|-----------|-----------|-----------|
| 77                   | -2.886892 | -0.811709 | -0.172775 | 77                   | -2.901530 | -0.742476 | 0.010001  |
| 7                    | -6.749027 | -0.162091 | 1.692149  | 7                    | -5.688228 | 1.059152  | 2.572426  |
| 7                    | -4.820048 | -1.260700 | 0.876388  | 7                    | -4.182708 | -0.480880 | 1.579246  |
| 7                    | -0.756516 | -0.845105 | -1.987164 | 7                    | -1.545433 | -0.899407 | -1.514170 |
| 8                    | -2.358067 | -2.894337 | -0.452627 | 8                    | -2.568134 | -2.850686 | 0.443902  |
| 8                    | -4.035854 | -0.964232 | -1.993703 | 8                    | -4.578140 | -1.404095 | -1.215750 |
| 6                    | -1.988526 | -4.958238 | -1.488724 | 6                    | -2.719465 | -5.181833 | 0.387011  |
| 1                    | -0.898022 | -4.865654 | -1.504059 | 1                    | -1.652814 | -5.260309 | 0.160440  |
| 1                    | -2.307830 | -5.559717 | -2.340419 | 1                    | -3.257744 | -5.999335 | -0.093729 |
| 1                    | -2.252275 | -5.468344 | -0.558868 | 1                    | -2.819369 | -5.275863 | 1.472583  |
| 6                    | -2.589011 | -3.576236 | -1.487968 | 6                    | -3.213149 | -3.822958 | -0.041648 |
| 6                    | -3.339762 | -3.171758 | -2.608103 | 6                    | -4.322223 | -3.758361 | -0.900524 |
| 1                    | -3.449612 | -3.900452 | -3.401657 | 1                    | -4.760676 | -4.704012 | -1.193710 |
| 6                    | -4.017741 | -1.957374 | -2.782185 | 6                    | -4.938144 | -2.600688 | -1.404110 |
| 6                    | -4.841985 | -1.767003 | -4.029387 | 6                    | -6.161595 | -2.761807 | -2.270454 |
| 1                    | -5.881166 | -1.582969 | -3.743025 | 1                    | -7.012171 | -2.286801 | -1.772928 |
| 1                    | -4.799847 | -2.624558 | -4.701833 | 1                    | -6.402673 | -3.805730 | -2.473500 |
| 1                    | -4.496167 | -0.871683 | -4.553730 | 1                    | -6.010220 | -2.230894 | -3.214193 |
| 6                    | 0.817442  | -1.250435 | -3.725595 | 6                    | -0.786423 | -1.250496 | -3.727060 |
| 1                    | 1.033693  | -1.446135 | -4.767613 | 1                    | -0.996773 | -1.445830 | -4.770363 |
| 6                    | -0.483541 | -1.093659 | -3.258373 | 6                    | -1.806392 | -1.143299 | -2.798298 |
| 1                    | -1.336281 | -1.170705 | -3.927440 | 1                    | -2.855282 | -1.243153 | -3.055638 |
| 6                    | 0.261135  | -0.748321 | -1.129780 | 6                    | -0.245151 | -0.749210 | -1.128226 |
| 6                    | 0.059372  | -0.417886 | 0.251490  | 6                    | -0.050098 | -0.419191 | 0.254538  |
| 6                    | -1.230390 | -0.221849 | 0.795422  | 6                    | -1.237888 | -0.247317 | 1.003042  |
| 6                    | -1.299571 | 0.246775  | 2.105578  | 6                    | -1.100761 | 0.180755  | 2.321867  |
| 1                    | -2.273788 | 0.473249  | 2.526659  | 1                    | -1.993779 | 0.342676  | 2.917466  |

---

|    |           |           |           |    |           |           |           |
|----|-----------|-----------|-----------|----|-----------|-----------|-----------|
| 6  | -0.149403 | 0.438738  | 2.891487  | 6  | 0.150916  | 0.434777  | 2.895190  |
| 6  | -0.313268 | 0.950209  | 4.324252  | 6  | 0.223383  | 0.939764  | 4.338369  |
| 6  | -0.998375 | 2.325541  | 4.291520  | 6  | -0.534815 | 2.271923  | 4.446051  |
| 1  | -1.129754 | 2.706960  | 5.310047  | 1  | -0.494659 | 2.647556  | 5.474447  |
| 1  | -0.393588 | 3.044951  | 3.731615  | 1  | -0.089920 | 3.024668  | 3.788773  |
| 6  | -1.181558 | -0.034665 | 5.121807  | 6  | -0.424651 | -0.093898 | 5.272154  |
| 1  | -0.714060 | -1.023261 | 5.158711  | 1  | 0.096953  | -1.053724 | 5.210693  |
| 1  | -2.173868 | -0.149686 | 4.679192  | 1  | -1.473970 | -0.266050 | 5.019327  |
| 1  | -1.310477 | 0.322406  | 6.149348  | 1  | -0.380676 | 0.254322  | 6.309891  |
| 6  | -5.298572 | -2.437635 | 1.267054  | 6  | -4.459161 | -1.382852 | 2.522121  |
| 1  | -4.669439 | -3.299217 | 1.062084  | 1  | -3.925610 | -2.323862 | 2.444857  |
| 6  | -6.527611 | -2.534861 | 1.892656  | 6  | -5.366609 | -1.104324 | 3.526993  |
| 1  | -6.928771 | -3.486064 | 2.217766  | 1  | -5.594042 | -1.832102 | 4.294825  |
| 6  | -7.218976 | -1.339479 | 2.072882  | 6  | -5.964784 | 0.150718  | 3.496422  |
| 1  | -8.198039 | -1.332342 | 2.547642  | 1  | -6.694671 | 0.438853  | 4.249594  |
| 6  | -5.547794 | -0.142711 | 1.104261  | 6  | -4.799847 | 0.734961  | 1.634546  |
| 6  | -4.931219 | 1.100487  | 0.681625  | 6  | -4.386227 | 1.654144  | 0.598887  |
| 6  | -3.644334 | 1.031977  | 0.095053  | 6  | -3.402873 | 1.166298  | -0.293022 |
| 6  | -3.061952 | 2.240300  | -0.287442 | 6  | -2.967468 | 2.041666  | -1.287415 |
| 1  | -2.068275 | 2.210411  | -0.723378 | 1  | -2.205663 | 1.703527  | -1.983061 |
| 6  | -3.694890 | 3.476481  | -0.120165 | 6  | -3.475407 | 3.337914  | -1.428245 |
| 6  | -4.970553 | 3.498202  | 0.458547  | 6  | -4.452750 | 3.776412  | -0.524471 |
| 1  | -5.492510 | 4.436025  | 0.603112  | 1  | -4.865433 | 4.774379  | -0.603808 |
| 6  | -5.581184 | 2.323821  | 0.856604  | 6  | -4.903088 | 2.943425  | 0.483989  |
| 1  | -6.568334 | 2.332242  | 1.306897  | 1  | -5.656828 | 3.275496  | 1.190687  |
| 6  | -1.686143 | 4.905144  | 0.270607  | 6  | -1.437184 | 4.394121  | -2.426517 |
| 1  | -1.915400 | 4.973701  | 1.338303  | 1  | -1.179548 | 4.862955  | -1.472594 |
| 1  | -1.153245 | 5.816056  | -0.023732 | 1  | -1.052327 | 5.026116  | -3.234144 |
| 1  | -1.011796 | 4.057133  | 0.128630  | 1  | -0.917191 | 3.434201  | -2.475750 |
| 6  | -3.827263 | 6.006293  | -0.342188 | 6  | -3.592936 | 5.618151  | -2.550505 |
| 1  | -4.077945 | 6.155046  | 0.712440  | 1  | -3.382019 | 6.153345  | -1.619799 |
| 1  | -4.758816 | 5.964908  | -0.915043 | 1  | -4.678070 | 5.571042  | -2.682278 |
| 1  | -3.270794 | 6.887150  | -0.676451 | 1  | -3.185127 | 6.212013  | -3.374107 |
| 6  | -2.974486 | 4.753772  | -0.553152 | 6  | -2.957651 | 4.226311  | -2.561202 |
| 6  | -2.621753 | 4.662440  | -2.045408 | 6  | -3.279375 | 3.564123  | -3.909887 |
| 1  | -2.105406 | 5.573178  | -2.367442 | 1  | -2.914945 | 4.187203  | -4.733833 |
| 1  | -3.524964 | 4.547289  | -2.652120 | 1  | -4.358634 | 3.432402  | -4.031271 |
| 1  | -1.966556 | 3.813804  | -2.255150 | 1  | -2.810119 | 2.580815  | -3.997263 |
| 77 | 2.910913  | -0.736018 | 0.022488  | 77 | 2.895725  | -0.805052 | -0.160816 |
| 7  | 5.691950  | 1.074187  | 2.585052  | 7  | 6.757968  | -0.132965 | 1.695238  |
| 7  | 4.187280  | -0.468700 | 1.595234  | 7  | 4.833077  | -1.242575 | 0.884921  |
| 7  | 1.563732  | -0.897900 | -1.508724 | 7  | 0.777310  | -0.845469 | -1.979712 |
| 8  | 2.585638  | -2.845407 | 0.455793  | 8  | 2.380447  | -2.891231 | -0.440949 |
| 8  | 4.597480  | -1.391575 | -1.193314 | 8  | 4.046378  | -0.948828 | -1.981914 |

---

|   |           |           |           |   |           |           |           |
|---|-----------|-----------|-----------|---|-----------|-----------|-----------|
| 6 | 2.746814  | -5.175931 | 0.401286  | 6 | 2.030607  | -4.959371 | -1.475491 |
| 1 | 1.682026  | -5.259221 | 0.167759  | 1 | 0.939477  | -4.875667 | -1.496437 |
| 1 | 3.291712  | -5.991524 | -0.075209 | 1 | 2.358896  | -5.559938 | -2.324402 |
| 1 | 2.839997  | -5.268595 | 1.487568  | 1 | 2.293828  | -5.465448 | -0.543305 |
| 6 | 3.237430  | -3.815352 | -0.025429 | 6 | 2.620024  | -3.572582 | -1.474673 |
| 6 | 4.351023  | -3.746668 | -0.878014 | 6 | 3.370886  | -3.163745 | -2.593196 |
| 1 | 4.795239  | -4.690571 | -1.168127 | 1 | 3.489237  | -3.892991 | -3.385019 |
| 6 | 4.964236  | -2.586494 | -1.379106 | 6 | 4.039072  | -1.944030 | -2.767951 |
| 6 | 6.192924  | -2.742370 | -2.238921 | 6 | 4.865408  | -1.749580 | -4.013175 |
| 1 | 7.038511  | -2.262461 | -1.737618 | 1 | 5.902415  | -1.557615 | -3.724125 |
| 1 | 6.440288  | -3.785291 | -2.439529 | 1 | 4.831457  | -2.608473 | -4.684378 |
| 1 | 6.043656  | -2.213330 | -3.184049 | 1 | 4.514699  | -0.857577 | -4.539904 |
| 6 | 1.832104  | -1.142071 | -2.791143 | 6 | 0.511868  | -1.093455 | -3.252644 |
| 1 | 2.882520  | -1.241016 | -3.042554 | 1 | 1.368435  | -1.169858 | -3.916825 |
| 6 | 1.240342  | -0.245195 | 1.003993  | 6 | 1.233716  | -0.224510 | 0.803313  |
| 6 | 1.100766  | 0.185021  | 2.328049  | 6 | 1.301348  | 0.243503  | 2.119665  |
| 1 | 1.992570  | 0.344321  | 2.921739  | 1 | 2.274510  | 0.464331  | 2.540311  |
| 1 | -1.982515 | 2.278527  | 3.818825  | 1 | -1.585855 | 2.165931  | 4.166348  |
| 6 | 1.024386  | 1.101021  | 5.050699  | 6 | 1.660295  | 1.171421  | 4.809364  |
| 1 | 1.554678  | 0.146658  | 5.125822  | 1 | 2.249233  | 0.249770  | 4.782861  |
| 1 | 1.679532  | 1.820881  | 4.551426  | 1 | 2.171498  | 1.923135  | 4.201138  |
| 1 | 0.847280  | 1.463772  | 6.067834  | 1 | 1.650451  | 1.530767  | 5.843038  |
| 6 | 4.465624  | -1.369150 | 2.538964  | 6 | 5.318759  | -2.416603 | 1.275517  |
| 1 | 3.933452  | -2.311051 | 2.462960  | 1 | 4.693944  | -3.281764 | 1.072419  |
| 6 | 5.373640  | -1.088384 | 3.542608  | 6 | 6.549556  | -2.506688 | 1.898659  |
| 1 | 5.602646  | -1.814894 | 4.311171  | 1 | 6.956527  | -3.455434 | 2.223724  |
| 6 | 5.970199  | 0.167317  | 3.510073  | 6 | 7.234997  | -1.307452 | 2.076058  |
| 1 | 6.700306  | 0.457267  | 4.262322  | 1 | 8.215135  | -1.294667 | 2.548471  |
| 6 | 4.803298  | 0.747723  | 1.648360  | 6 | 5.555240  | -0.120432 | 1.110294  |
| 6 | 4.388571  | 1.664992  | 0.611274  | 6 | 4.930876  | 1.119097  | 0.688373  |
| 6 | 3.406901  | 1.174368  | -0.280841 | 6 | 3.642423  | 1.043369  | 0.106225  |
| 6 | 2.969511  | 2.047981  | -1.275824 | 6 | 3.052001  | 2.248325  | -0.274404 |
| 1 | 2.208561  | 1.707585  | -1.971278 | 1 | 2.056893  | 2.212966  | -0.706635 |
| 6 | 3.474513  | 3.345326  | -1.417420 | 6 | 3.679014  | 3.487918  | -0.110137 |
| 6 | 4.450840  | 3.786471  | -0.513880 | 6 | 4.956811  | 3.516777  | 0.463449  |
| 1 | 4.861523  | 4.785216  | -0.593937 | 1 | 5.474438  | 4.457420  | 0.605227  |
| 6 | 4.902751  | 2.955202  | 0.495379  | 6 | 5.575040  | 2.345891  | 0.860092  |
| 1 | 5.655696  | 3.289389  | 1.201934  | 1 | 6.563648  | 2.359782  | 1.307017  |
| 6 | 1.433889  | 4.397224  | -2.415251 | 6 | 1.665270  | 4.906549  | 0.289804  |
| 1 | 1.176148  | 4.866725  | -1.461687 | 1 | 1.900585  | 4.979119  | 1.355960  |
| 1 | 1.047412  | 5.027726  | -3.223274 | 1 | 1.125136  | 5.813679  | -0.002973 |
| 1 | 0.915424  | 3.436393  | -2.463036 | 1 | 0.995191  | 4.054205  | 0.153630  |
| 6 | 3.587542  | 5.624760  | -2.541627 | 6 | 3.797408  | 6.018157  | -0.335352 |
| 1 | 3.376059  | 6.160448  | -1.611333 | 1 | 4.052776  | 6.169330  | 0.717811  |

|   |          |          |           |   |          |          |           |
|---|----------|----------|-----------|---|----------|----------|-----------|
| 1 | 4.672711 | 5.579317 | -2.673729 | 1 | 4.726252 | 5.980813 | -0.912866 |
| 1 | 3.178442 | 6.217212 | -3.365598 | 1 | 3.234839 | 6.895862 | -0.667707 |
| 6 | 2.954578 | 4.231865 | -2.550827 | 6 | 2.949956 | 4.761098 | -0.540687 |
| 6 | 3.276568 | 3.569143 | -3.899184 | 6 | 2.590025 | 4.666648 | -2.031026 |
| 1 | 2.910648 | 4.191015 | -4.723377 | 1 | 2.068446 | 5.574917 | -2.351554 |
| 1 | 4.355969 | 3.439075 | -4.021112 | 1 | 3.490702 | 4.554414 | -2.642033 |
| 1 | 2.808817 | 2.585036 | -3.985590 | 1 | 1.937170 | 3.815228 | -2.236674 |

| D2- <sup>3</sup> MC3 |           |           |           | D2- <sup>3</sup> MC4 |           |           |           |
|----------------------|-----------|-----------|-----------|----------------------|-----------|-----------|-----------|
| 77                   | -2.713244 | -0.616959 | -0.497393 | 77                   | -2.923483 | -0.733314 | -0.023968 |
| 7                    | -6.574957 | -0.301602 | 1.796660  | 7                    | -5.710995 | 1.068567  | 2.531578  |
| 7                    | -4.627743 | -1.304718 | 0.897930  | 7                    | -4.220919 | -0.478749 | 1.527117  |
| 7                    | -0.787857 | -0.907204 | -1.897050 | 7                    | -1.537296 | -0.889305 | -1.533022 |
| 8                    | -2.307196 | -2.743801 | -0.335612 | 8                    | -2.637935 | -2.858085 | 0.366364  |
| 8                    | -4.125336 | -1.110467 | -2.081839 | 8                    | -4.578826 | -1.334456 | -1.310556 |
| 6                    | -2.233869 | -5.013927 | -0.865936 | 6                    | -2.831293 | -5.183757 | 0.249162  |
| 1                    | -1.157135 | -4.999000 | -1.059102 | 1                    | -1.764221 | -5.281916 | 0.032110  |
| 1                    | -2.702236 | -5.773850 | -1.492202 | 1                    | -3.381803 | -5.979391 | -0.253909 |
| 1                    | -2.360650 | -5.276856 | 0.187954  | 1                    | -2.945078 | -5.296503 | 1.331485  |
| 6                    | -2.788077 | -3.632602 | -1.105920 | 6                    | -3.289132 | -3.805680 | -0.157835 |
| 6                    | -3.745894 | -3.466141 | -2.111742 | 6                    | -4.374889 | -3.699820 | -1.042308 |
| 1                    | -4.047130 | -4.363164 | -2.638269 | 1                    | -4.823730 | -4.629917 | -1.367812 |
| 6                    | -4.361165 | -2.264266 | -2.523926 | 6                    | -4.956602 | -2.519344 | -1.533931 |
| 6                    | -5.409284 | -2.335372 | -3.604801 | 6                    | -6.162838 | -2.637987 | -2.431023 |
| 1                    | -6.376955 | -2.061000 | -3.173920 | 1                    | -7.019711 | -2.173770 | -1.933923 |
| 1                    | -5.489346 | -3.325834 | -4.054012 | 1                    | -6.408879 | -3.671741 | -2.676015 |
| 1                    | -5.183819 | -1.596019 | -4.377235 | 1                    | -5.987633 | -2.074578 | -3.351398 |
| 6                    | 0.706991  | -1.317630 | -3.690485 | 6                    | -0.684178 | -1.248364 | -3.715701 |
| 1                    | 0.882517  | -1.529179 | -4.736678 | 1                    | -0.855962 | -1.442490 | -4.765892 |
| 6                    | -0.576457 | -1.175751 | -3.177853 | 6                    | -1.742253 | -1.130972 | -2.825957 |
| 1                    | -1.459732 | -1.279119 | -3.801526 | 1                    | -2.779294 | -1.223859 | -3.129850 |
| 6                    | 0.268615  | -0.771039 | -1.079788 | 6                    | -0.255302 | -0.746094 | -1.094438 |
| 6                    | 0.090193  | -0.422638 | 0.284742  | 6                    | -0.081355 | -0.425658 | 0.277809  |
| 6                    | -1.214447 | -0.226488 | 0.795221  | 6                    | -1.275249 | -0.285907 | 1.026521  |
| 6                    | -1.288593 | 0.168446  | 2.124448  | 6                    | -1.125121 | 0.081429  | 2.356731  |
| 1                    | -2.265818 | 0.343696  | 2.562523  | 1                    | -2.006033 | 0.223823  | 2.974761  |
| 6                    | -0.138611 | 0.361391  | 2.911058  | 6                    | 0.144613  | 0.280302  | 2.926637  |
| 6                    | -0.315037 | 0.822726  | 4.360466  | 6                    | 0.230491  | 0.692056  | 4.399155  |



|    |           |           |           |    |           |           |           |
|----|-----------|-----------|-----------|----|-----------|-----------|-----------|
| 6  | -1.033702 | 2.181286  | 4.372059  | 6  | -0.485928 | 2.038364  | 4.588771  |
| 1  | -1.176057 | 2.525319  | 5.402540  | 1  | -0.437328 | 2.347691  | 5.638670  |
| 1  | -0.445760 | 2.933775  | 3.838040  | 1  | -0.015012 | 2.816139  | 3.980537  |
| 6  | -1.160150 | -0.208263 | 5.124529  | 6  | -0.451474 | -0.375712 | 5.268660  |
| 1  | -0.668384 | -1.185697 | 5.129691  | 1  | 0.035898  | -1.347177 | 5.142875  |
| 1  | -2.148680 | -0.333431 | 4.676757  | 1  | -1.506834 | -0.495161 | 5.011192  |
| 1  | -1.297796 | 0.112201  | 6.163093  | 1  | -0.392011 | -0.096245 | 6.326304  |
| 6  | -5.036029 | -2.496601 | 1.308364  | 6  | -4.523823 | -1.393428 | 2.449380  |
| 1  | -4.373192 | -3.329185 | 1.094380  | 1  | -4.004876 | -2.341513 | 2.360563  |
| 6  | -6.238481 | -2.657206 | 1.978796  | 6  | -5.438969 | -1.117958 | 3.448098  |
| 1  | -6.578044 | -3.627459 | 2.318557  | 1  | -5.687978 | -1.855947 | 4.199302  |
| 6  | -6.979167 | -1.500686 | 2.190543  | 6  | -6.015734 | 0.147259  | 3.433838  |
| 1  | -7.938129 | -1.538738 | 2.703290  | 1  | -6.750891 | 0.433291  | 4.182648  |
| 6  | -5.400893 | -0.236842 | 1.159989  | 6  | -4.815814 | 0.747371  | 1.599585  |
| 6  | -4.868592 | 1.050868  | 0.729829  | 6  | -4.368946 | 1.679606  | 0.589722  |
| 6  | -3.619640 | 1.079908  | 0.076947  | 6  | -3.379538 | 1.190452  | -0.294466 |
| 6  | -3.078929 | 2.326621  | -0.242814 | 6  | -2.907466 | 2.077581  | -1.261224 |
| 1  | -2.089348 | 2.364247  | -0.688438 | 1  | -2.139418 | 1.738033  | -1.949299 |
| 6  | -3.760874 | 3.525908  | -0.002481 | 6  | -3.386157 | 3.386680  | -1.383339 |
| 6  | -5.010101 | 3.456994  | 0.620600  | 6  | -4.371689 | 3.825839  | -0.488855 |
| 1  | -5.565096 | 4.361395  | 0.837245  | 1  | -4.762840 | 4.833439  | -0.554404 |
| 6  | -5.549556 | 2.236989  | 0.994509  | 6  | -4.857583 | 2.981093  | 0.493192  |
| 1  | -6.507141 | 2.183188  | 1.501434  | 1  | -5.617236 | 3.313850  | 1.193213  |
| 6  | -1.799976 | 5.017730  | 0.400791  | 6  | -1.308638 | 4.430804  | -2.310815 |
| 1  | -1.996444 | 5.027236  | 1.477029  | 1  | -1.068755 | 4.881015  | -1.343303 |
| 1  | -1.313545 | 5.962094  | 0.133202  | 1  | -0.894002 | 5.069739  | -3.098076 |
| 1  | -1.096568 | 4.206197  | 0.198662  | 1  | -0.802535 | 3.463361  | -2.362196 |
| 6  | -4.005536 | 6.053635  | -0.086928 | 6  | -3.442431 | 5.689155  | -2.464602 |
| 1  | -4.225439 | 6.138471  | 0.981484  | 1  | -3.245053 | 6.204550  | -1.519885 |
| 1  | -4.953376 | 5.999909  | -0.631282 | 1  | -4.524858 | 5.660222  | -2.621299 |
| 1  | -3.498606 | 6.973641  | -0.392991 | 1  | -3.007532 | 6.291482  | -3.267978 |
| 6  | -3.107353 | 4.852642  | -0.389737 | 6  | -2.827756 | 4.288355  | -2.486284 |
| 6  | -2.801336 | 4.852405  | -1.894835 | 6  | -3.125214 | 3.657176  | -3.855210 |
| 1  | -2.328602 | 5.797132  | -2.183874 | 1  | -2.731883 | 4.290528  | -4.657758 |
| 1  | -3.719425 | 4.735815  | -2.478501 | 1  | -4.202877 | 3.543468  | -4.005286 |
| 1  | -2.123010 | 4.041325  | -2.170038 | 1  | -2.668141 | 2.668889  | -3.950843 |
| 77 | 2.931654  | -0.733698 | 0.000167  | 77 | 2.724098  | -0.604862 | -0.495230 |
| 7  | 5.715679  | 1.118638  | 2.522989  | 7  | 6.570726  | -0.297451 | 1.824390  |
| 7  | 4.225103  | -0.447450 | 1.549216  | 7  | 4.634767  | -1.299891 | 0.901186  |
| 7  | 1.552214  | -0.920984 | -1.511411 | 7  | 0.803898  | -0.867282 | -1.910326 |
| 8  | 2.649102  | -2.850310 | 0.433669  | 8  | 2.325405  | -2.733752 | -0.371100 |
| 8  | 4.590707  | -1.360399 | -1.269767 | 8  | 4.146087  | -1.066878 | -2.080261 |
| 6  | 2.839801  | -5.178020 | 0.360046  | 6  | 2.271024  | -4.997207 | -0.930894 |
| 1  | 1.772066  | -5.278720 | 0.147467  | 1  | 1.196673  | -4.987233 | -1.137284 |

---

|   |           |           |           |   |           |           |           |
|---|-----------|-----------|-----------|---|-----------|-----------|-----------|
| 1 | 3.388085  | -5.983531 | -0.129557 | 1 | 2.752048  | -5.746868 | -1.559904 |
| 1 | 2.956186  | -5.271008 | 1.443975  | 1 | 2.386463  | -5.271085 | 0.121475  |
| 6 | 3.298556  | -3.808413 | -0.073489 | 6 | 2.818791  | -3.609721 | -1.148499 |
| 6 | 4.383175  | -3.720327 | -0.961150 | 6 | 3.783655  | -3.424263 | -2.144054 |
| 1 | 4.830408  | -4.656734 | -1.270312 | 1 | 4.094615  | -4.312339 | -2.680012 |
| 6 | 4.966700  | -2.549446 | -1.473068 | 6 | 4.392737  | -2.212793 | -2.536768 |
| 6 | 6.172556  | -2.685216 | -2.368199 | 6 | 5.446810  | -2.261646 | -3.612969 |
| 1 | 7.029558  | -2.211265 | -1.880640 | 1 | 6.409408  | -1.981489 | -3.174574 |
| 1 | 6.418602  | -3.723472 | -2.593332 | 1 | 5.539359  | -3.246396 | -4.072211 |
| 1 | 5.996835  | -2.139795 | -3.299281 | 1 | 5.217196  | -1.516710 | -4.378820 |
| 6 | 1.761944  | -1.184108 | -2.799291 | 6 | 0.597276  | -1.114009 | -3.196251 |
| 1 | 2.800179  | -1.280418 | -3.097994 | 1 | 1.482884  | -1.205902 | -3.818459 |
| 6 | 1.278708  | -0.264280 | 1.031660  | 6 | 1.218237  | -0.245192 | 0.796712  |
| 6 | 1.128485  | 0.141761  | 2.356656  | 6 | 1.293453  | 0.110693  | 2.142912  |
| 1 | 2.009727  | 0.297333  | 2.966845  | 1 | 2.270391  | 0.265127  | 2.583592  |
| 1 | -2.014921 | 2.124828  | 3.894712  | 1 | -1.538536 | 1.982823  | 4.300755  |
| 6 | 1.015611  | 0.983588  | 5.097797  | 6 | 1.672393  | 0.848328  | 4.886388  |
| 1 | 1.568634  | 0.040586  | 5.147154  | 1 | 2.231777  | -0.088078 | 4.801870  |
| 1 | 1.655254  | 1.733544  | 4.623364  | 1 | 2.209452  | 1.619599  | 4.327110  |
| 1 | 0.825265  | 1.311177  | 6.124544  | 1 | 1.670555  | 1.141681  | 5.940880  |
| 6 | 4.527936  | -1.344104 | 2.489009  | 6 | 5.046844  | -2.494508 | 1.299662  |
| 1 | 4.008397  | -2.293400 | 2.418461  | 1 | 4.390212  | -3.328093 | 1.070740  |
| 6 | 5.443773  | -1.049739 | 3.481591  | 6 | 6.245682  | -2.656856 | 1.976037  |
| 1 | 5.692840  | -1.773023 | 4.246934  | 1 | 6.588437  | -3.629345 | 2.306071  |
| 6 | 6.020730  | 0.214826  | 3.442715  | 6 | 6.978700  | -1.499004 | 2.206627  |
| 1 | 6.756281  | 0.515103  | 4.185519  | 1 | 7.934470  | -1.538171 | 2.725211  |
| 6 | 4.820229  | 0.779574  | 1.597796  | 6 | 5.400431  | -0.231150 | 1.181038  |
| 6 | 4.373230  | 1.692287  | 0.570151  | 6 | 4.865048  | 1.058869  | 0.761320  |
| 6 | 3.385906  | 1.185598  | -0.306400 | 6 | 3.618615  | 1.090027  | 0.103762  |
| 6 | 2.912261  | 2.054781  | -1.288502 | 6 | 3.076415  | 2.337599  | -0.209828 |
| 1 | 2.145140  | 1.701630  | -1.970707 | 1 | 2.088860  | 2.376178  | -0.659934 |
| 6 | 3.387022  | 3.363217  | -1.432076 | 6 | 3.755970  | 3.536526  | 0.039604  |
| 6 | 4.371413  | 3.819692  | -0.545026 | 6 | 5.002287  | 3.465803  | 0.668211  |
| 1 | 4.759995  | 4.827082  | -0.627214 | 1 | 5.555045  | 4.369756  | 0.892281  |
| 6 | 4.859071  | 2.992890  | 0.451322  | 6 | 5.542238  | 2.244478  | 1.037195  |
| 1 | 5.617594  | 3.339331  | 1.145909  | 1 | 6.497733  | 2.189243  | 1.547873  |
| 6 | 1.305198  | 4.383607  | -2.376378 | 6 | 1.794647  | 5.028845  | 0.441160  |
| 1 | 1.062433  | 4.844953  | -1.414832 | 1 | 1.988468  | 5.037512  | 1.517882  |
| 1 | 0.888628  | 5.010836  | -3.171986 | 1 | 1.309016  | 5.973595  | 0.173560  |
| 1 | 0.803013  | 3.413582  | -2.416142 | 1 | 1.091570  | 4.217812  | 0.235989  |
| 6 | 3.432999  | 5.649474  | -2.547057 | 6 | 4.002223  | 6.064407  | -0.037685 |
| 1 | 3.232393  | 6.177298  | -1.609912 | 1 | 4.218863  | 6.146965  | 1.031569  |
| 1 | 4.515682  | 5.623617  | -2.702531 | 1 | 4.951719  | 6.011097  | -0.579169 |
| 1 | 2.995759  | 6.238095  | -3.359260 | 1 | 3.496878  | 6.985395  | -0.343419 |

---

|   |          |          |           |   |          |          |           |
|---|----------|----------|-----------|---|----------|----------|-----------|
| 6 | 2.825125 | 4.245570 | -2.548783 | 6 | 3.104141 | 4.864674 | -0.345903 |
| 6 | 3.126560 | 3.595570 | -3.907953 | 6 | 2.802445 | 4.868699 | -1.851900 |
| 1 | 2.730526 | 4.214879 | -4.720083 | 1 | 2.331686 | 5.814763 | -2.139752 |
| 1 | 4.204878 | 3.485070 | -4.055711 | 1 | 3.722126 | 4.752611 | -2.433143 |
| 1 | 2.674425 | 2.603712 | -3.988819 | 1 | 2.123949 | 4.059244 | -2.131379 |

| <b>Ir1-CI-3MC</b> |           |           |           | <b>Ir1-2CI-3MC</b> |           |           |           |
|-------------------|-----------|-----------|-----------|--------------------|-----------|-----------|-----------|
| 77                | 2.93572   | 0.836591  | -0.066313 | 77                 | 2.696661  | 0.715689  | -0.3891   |
| 7                 | 6.856413  | 0.048284  | 1.650942  | 7                  | 6.646656  | -0.097931 | 1.279647  |
| 7                 | 4.893428  | 1.201734  | 1.008847  | 7                  | 4.694636  | 1.079357  | 0.656109  |
| 7                 | 0.906346  | 0.828397  | -1.859727 | 7                  | 0.564207  | 0.643496  | -2.030092 |
| 8                 | 2.312753  | 2.913379  | -0.072559 | 8                  | 2.108764  | 2.798524  | -0.467272 |
| 8                 | 4.088189  | 1.292023  | -1.841073 | 8                  | 3.802542  | 1.076686  | -2.203162 |
| 6                 | 1.91857   | 5.108539  | -0.779154 | 6                  | 1.701565  | 4.958399  | -1.270884 |
| 1                 | 0.830506  | 4.995547  | -0.769063 | 1                  | 0.614657  | 4.86208   | -1.194272 |
| 1                 | 2.198386  | 5.825868  | -1.551232 | 1                  | 1.946272  | 5.627679  | -2.09613  |
| 1                 | 2.204681  | 5.498024  | 0.201484  | 1                  | 2.046478  | 5.397709  | -0.331048 |
| 6                 | 2.550644  | 3.755768  | -0.980116 | 6                  | 2.307234  | 3.588624  | -1.430097 |
| 6                 | 3.344901  | 3.55099   | -2.125295 | 6                  | 3.040278  | 3.311199  | -2.600374 |
| 1                 | 3.455831  | 4.397931  | -2.790914 | 1                  | 3.121541  | 4.116273  | -3.319956 |
| 6                 | 4.065298  | 2.396973  | -2.463193 | 6                  | 3.747834  | 2.138503  | -2.896341 |
| 6                 | 4.933723  | 2.42903   | -3.694566 | 6                  | 4.56336   | 2.091956  | -4.162083 |
| 1                 | 5.971953  | 2.251256  | -3.400553 | 1                  | 5.615665  | 1.948672  | -3.90078  |
| 1                 | 4.869204  | 3.374431  | -4.234117 | 1                  | 4.462631  | 2.995876  | -4.763545 |
| 1                 | 4.648403  | 1.60676   | -4.356665 | 1                  | 4.263277  | 1.221232  | -4.751593 |
| 6                 | -0.609604 | 1.435716  | -3.577736 | 6                  | -1.050209 | 1.180657  | -3.67977  |
| 1                 | -0.815571 | 1.873584  | -4.54389  | 1                  | -1.311533 | 1.561368  | -4.656692 |
| 6                 | 0.671777  | 1.318028  | -3.066156 | 6                  | 0.259703  | 1.065632  | -3.24649  |
| 6                 | -0.128861 | 0.402501  | -1.136999 | 1                  | 1.090045  | 1.339853  | -3.890701 |
| 6                 | 0.065116  | -0.045595 | 0.205405  | 6                  | -0.428881 | 0.289701  | -1.214721 |
| 6                 | 1.334091  | 0.007613  | 0.822224  | 6                  | -0.153718 | -0.080435 | 0.137349  |
| 6                 | 0.273718  | -0.828439 | 2.861419  | 6                  | 1.158143  | -0.035581 | 0.6606    |
| 6                 | 0.438153  | -1.243044 | 4.32495   | 6                  | 0.222647  | -0.722062 | 2.813783  |
| 6                 | 1.396969  | -2.440878 | 4.409533  | 6                  | 0.478772  | -1.066268 | 4.282422  |
| 1                 | 1.531719  | -2.7426   | 5.453847  | 6                  | 1.383537  | -2.305792 | 4.361049  |
| 1                 | 0.999198  | -3.295955 | 3.854916  | 1                  | 1.584179  | -2.560441 | 5.407258  |
| 6                 | 1.019726  | -0.064219 | 5.120548  | 1                  | 0.903702  | -3.16626  | 3.885316  |
| 1                 | 0.354675  | 0.80287   | 5.070262  | 6                  | 1.174491  | 0.120523  | 4.966806  |
| 1                 | 1.996488  | 0.240292  | 4.736422  | 1                  | 0.549956  | 1.017345  | 4.917586  |
| 1                 | 1.142576  | -0.342433 | 6.172897  | 1                  | 2.132927  | 0.353863  | 4.496741  |
| 6                 | 5.356684  | 2.327675  | 1.541531  | 1                  | 1.363147  | -0.10925  | 6.020982  |
| 1                 | 4.709316  | 3.196344  | 1.460155  | 6                  | 5.201476  | 2.202555  | 1.155922  |
| 6                 | 6.59365   | 2.370393  | 2.157675  | 1                  | 4.577503  | 3.088189  | 1.075456  |
| 1                 | 6.981628  | 3.280454  | 2.596655  | 6                  | 6.450946  | 2.238597  | 1.742927  |

|    |           |           |           |    |           |           |           |
|----|-----------|-----------|-----------|----|-----------|-----------|-----------|
| 6  | 7.310035  | 1.176411  | 2.174306  | 1  | 6.875992  | 3.143028  | 2.154486  |
| 1  | 8.295942  | 1.128404  | 2.632196  | 6  | 7.125873  | 1.018501  | 1.760063  |
| 6  | 5.647109  | 0.079696  | 1.080265  | 6  | 5.422836  | -0.055223 | 0.732985  |
| 6  | 5.051848  | -1.112946 | 0.505439  | 6  | 4.800838  | -1.249654 | 0.199862  |
| 6  | 3.757178  | -0.999373 | -0.052509 | 6  | 3.496148  | -1.129378 | -0.334717 |
| 6  | 3.85076   | -3.389982 | -0.589686 | 6  | 3.549226  | -3.532354 | -0.822045 |
| 6  | 5.134254  | -3.460313 | -0.032282 | 6  | 4.843315  | -3.608203 | -0.288586 |
| 6  | 5.727946  | -2.335056 | 0.509379  | 6  | 5.461891  | -2.480971 | 0.217431  |
| 1  | 6.721017  | -2.382323 | 0.943914  | 1  | 6.463074  | -2.534035 | 0.632299  |
| 6  | 1.844018  | -4.864896 | -0.399888 | 6  | 1.535322  | -4.984681 | -0.558016 |
| 1  | 2.058163  | -5.05776  | 0.655638  | 1  | 1.773932  | -5.167389 | 0.494023  |
| 1  | 1.326745  | -5.740122 | -0.809    | 1  | 0.996752  | -5.857863 | -0.942978 |
| 1  | 1.162095  | -4.012376 | -0.452031 | 1  | 0.862686  | -4.124396 | -0.602641 |
| 6  | 4.001366  | -5.875068 | -1.108157 | 6  | 3.66537   | -6.026816 | -1.302339 |
| 1  | 4.246662  | -6.14072  | -0.075492 | 1  | 3.931901  | -6.279275 | -0.271676 |
| 1  | 4.936055  | -5.765156 | -1.666519 | 1  | 4.5878    | -5.93417  | -1.883705 |
| 1  | 3.451766  | -6.714896 | -1.544099 | 1  | 3.098423  | -6.867978 | -1.712539 |
| 6  | 3.143799  | -4.610625 | -1.180051 | 6  | 2.817438  | -4.755878 | -1.374347 |
| 6  | 2.809035  | -4.341317 | -2.655093 | 6  | 2.448513  | -4.50835  | -2.845117 |
| 1  | 2.293072  | -5.204966 | -3.088858 | 1  | 1.918455  | -5.376567 | -3.251639 |
| 1  | 3.719481  | -4.160279 | -3.234296 | 1  | 3.345409  | -4.341851 | -3.449244 |
| 1  | 2.161641  | -3.468204 | -2.768877 | 1  | 1.802193  | -3.634398 | -2.958526 |
| 77 | -2.710216 | -0.623799 | -0.284617 | 77 | -2.975321 | -0.587687 | -0.117314 |
| 7  | -5.529119 | -1.246652 | 2.741507  | 7  | -5.602575 | -0.861586 | 3.125382  |
| 7  | -3.853894 | -1.576124 | 1.09796   | 7  | -4.055697 | -1.385061 | 1.408287  |
| 7  | -1.427041 | 0.391382  | -1.59412  | 7  | -1.754998 | 0.284324  | -1.583178 |
| 8  | -1.927862 | -2.456259 | -1.173447 | 8  | -2.335894 | -2.51524  | -0.913722 |
| 8  | -4.465981 | -0.947192 | -1.548688 | 8  | -4.832241 | -0.926357 | -1.218516 |
| 6  | -1.658391 | -4.310231 | -2.573733 | 6  | -2.248111 | -4.482066 | -2.176084 |
| 1  | -1.34227  | -4.916715 | -1.720801 | 1  | -1.905842 | -5.043251 | -1.302296 |
| 1  | -2.19592  | -4.934513 | -3.288219 | 1  | -2.857718 | -5.127447 | -2.809319 |
| 1  | -0.747053 | -3.930362 | -3.045365 | 1  | -1.352446 | -4.180943 | -2.727657 |
| 6  | -2.47952  | -3.145236 | -2.083212 | 6  | -2.982829 | -3.246688 | -1.721852 |
| 6  | -3.744135 | -2.93891  | -2.648748 | 6  | -4.278834 | -3.028132 | -2.205513 |
| 1  | -4.062245 | -3.655983 | -3.395103 | 1  | -4.68249  | -3.785575 | -2.8656   |
| 6  | -4.647499 | -1.90136  | -2.349773 | 6  | -5.114167 | -1.930523 | -1.923861 |
| 6  | -5.975785 | -1.885878 | -3.062741 | 6  | -6.492761 | -1.909626 | -2.53355  |
| 1  | -6.018416 | -1.006332 | -3.712641 | 1  | -6.547877 | -1.09014  | -3.256973 |
| 1  | -6.145484 | -2.780429 | -3.662934 | 1  | -6.748856 | -2.84363  | -3.034792 |
| 1  | -6.776397 | -1.778789 | -2.326775 | 1  | -7.226896 | -1.696722 | -1.752758 |
| 6  | -1.640138 | 0.952278  | -2.782561 | 6  | -2.035124 | 0.771463  | -2.790405 |
| 6  | -1.092506 | -0.491949 | 0.86969   | 6  | -1.273574 | -0.444838 | 0.906119  |
| 6  | -0.961672 | -0.852962 | 2.214512  | 6  | -1.056277 | -0.732867 | 2.258305  |
| 1  | 2.381213  | -2.206487 | 3.996898  | 1  | 2.343065  | -2.143295 | 3.864074  |

|    |           |           |           |    |            |           |           |
|----|-----------|-----------|-----------|----|------------|-----------|-----------|
| 6  | -0.88731  | -1.645697 | 4.974067  | 6  | -0.811316  | -1.366555 | 5.047929  |
| 1  | -1.610708 | -0.825023 | 4.96424   | 1  | -1.493853  | -0.511532 | 5.044645  |
| 1  | -1.338911 | -2.508329 | 4.474734  | 1  | -1.338375  | -2.230079 | 4.631028  |
| 1  | -0.711928 | -1.922206 | 6.018241  | 1  | -0.571198  | -1.597166 | 6.090341  |
| 6  | -3.886348 | -2.893103 | 1.301652  | 6  | -4.129536  | -2.681237 | 1.710867  |
| 1  | -3.201841 | -3.479716 | 0.699395  | 1  | -3.512999  | -3.340622 | 1.110476  |
| 6  | -4.745798 | -3.443729 | 2.233895  | 6  | -4.9462    | -3.123357 | 2.734793  |
| 1  | -4.776962 | -4.511617 | 2.405446  | 1  | -5.010254  | -4.173597 | 2.987084  |
| 6  | -5.560467 | -2.557856 | 2.93022   | 6  | -5.674781  | -2.152887 | 3.413661  |
| 1  | -6.26739  | -2.918634 | 3.67394   | 1  | -6.344095  | -2.426128 | 4.226277  |
| 6  | -4.676263 | -0.774058 | 1.834802  | 6  | -4.794066  | -0.495027 | 2.133063  |
| 6  | -4.518368 | 0.636433  | 1.566901  | 6  | -4.598266  | 0.883825  | 1.749935  |
| 6  | -3.551873 | 0.961656  | 0.588025  | 6  | -3.687254  | 1.093064  | 0.689718  |
| 6  | -4.044798 | 3.324574  | 1.001844  | 6  | -4.049546  | 3.49963   | 0.959205  |
| 6  | -5.00592  | 2.95557   | 1.953508  | 6  | -4.961972  | 3.244822  | 1.992561  |
| 6  | -5.240088 | 1.622235  | 2.23803   | 6  | -5.232189  | 1.947593  | 2.389967  |
| 1  | -5.976187 | 1.327997  | 2.979259  | 1  | -5.928832  | 1.741419  | 3.196169  |
| 6  | -4.018848 | 5.036358  | -0.821666 | 6  | -4.028026  | 5.072554  | -0.987797 |
| 1  | -5.066828 | 4.836059  | -1.063612 | 1  | -5.091876  | 4.900453  | -1.175543 |
| 1  | -3.801907 | 6.079161  | -1.077883 | 1  | -3.77978   | 6.084362  | -1.326318 |
| 1  | -3.403086 | 4.396376  | -1.458591 | 1  | -3.46409   | 4.363825  | -1.599289 |
| 6  | -4.606049 | 5.759678  | 1.479521  | 6  | -4.491283  | 5.986211  | 1.272902  |
| 1  | -5.672995 | 5.616254  | 1.284431  | 1  | -5.570626  | 5.873758  | 1.133153  |
| 1  | -4.434773 | 5.653298  | 2.554872  | 1  | -4.277578  | 5.955809  | 2.345465  |
| 1  | -4.354074 | 6.788209  | 1.203929  | 1  | -4.211169  | 6.979101  | 0.907923  |
| 6  | -3.745986 | 4.787838  | 0.669758  | 6  | -3.70619   | 4.920113  | 0.506428  |
| 6  | -2.270138 | 5.08519   | 0.976962  | 6  | -2.207621  | 5.171311  | 0.736133  |
| 1  | -2.035537 | 6.12738   | 0.733754  | 1  | -1.936998  | 6.179281  | 0.402758  |
| 1  | -2.053581 | 4.924237  | 2.037058  | 1  | -1.956404  | 5.082913  | 1.797118  |
| 1  | -1.598981 | 4.441746  | 0.402447  | 1  | -1.588813  | 4.453534  | 0.191597  |
| 1  | 5.675534  | -4.398173 | -0.015479 | 1  | 5.372996   | -4.552336 | -0.263699 |
| 1  | -5.572712 | 3.71208   | 2.481824  | 1  | -5.461236  | 4.063111  | 2.496195  |
| 1  | -1.840431 | -1.171645 | 2.760765  | 1  | -1.903329  | -0.985031 | 2.883489  |
| 6  | 3.193772  | -2.156304 | -0.58792  | 6  | 2.907835   | -2.290853 | -0.832529 |
| 1  | 2.194678  | -2.088841 | -1.006487 | 1  | 1.901608   | -2.21947  | -1.232802 |
| 6  | -3.336729 | 2.316156  | 0.340062  | 6  | -3.429367  | 2.414656  | 0.3311    |
| 1  | -2.58722  | 2.597966  | -0.393081 | 1  | -2.716125  | 2.608008  | -0.464253 |
| 6  | 1.414223  | -0.433436 | 2.138626  | 6  | 1.320319   | -0.410662 | 1.989968  |
| 1  | 2.385015  | -0.467235 | 2.623068  | 1  | 2.322733   | -0.453842 | 2.404256  |
| 17 | -3.250893 | 1.120619  | -3.343248 | 17 | -3.674875  | 0.937827  | -3.258595 |
| 1  | 1.535753  | 1.646949  | -3.636113 | 17 | 8.713183   | 0.95593   | 2.46312   |
|    | lr2-Cl-T1 |           |           |    | lr2-2Cl-T1 |           |           |
| 77 | 2.869732  | 0.779902  | 0.081862  | 77 | 2.720473   | 0.434401  | -0.273376 |
| 7  | 6.745784  | -0.224185 | 1.778234  | 7  | 6.589998   | -0.715033 | 1.374426  |

|   |           |           |           |   |           |           |           |
|---|-----------|-----------|-----------|---|-----------|-----------|-----------|
| 7 | 4.808637  | 1.010487  | 1.212651  | 7 | 4.741382  | 0.620987  | 0.758421  |
| 7 | 0.789087  | 0.974059  | -1.735228 | 7 | 0.555267  | 0.540292  | -1.959082 |
| 8 | 2.280802  | 2.859347  | 0.225331  | 8 | 2.351556  | 2.559962  | -0.406172 |
| 8 | 4.018249  | 1.332277  | -1.656636 | 8 | 3.832212  | 0.620403  | -2.103388 |
| 6 | 1.880693  | 5.090305  | -0.360922 | 6 | 2.132347  | 4.715961  | -1.291564 |
| 1 | 0.794838  | 5.009497  | -0.472133 | 1 | 1.039406  | 4.736516  | -1.245945 |
| 1 | 2.245907  | 5.872824  | -1.026696 | 1 | 2.466461  | 5.336926  | -2.12305  |
| 1 | 2.073545  | 5.368082  | 0.67789   | 1 | 2.496215  | 5.136064  | -0.350535 |
| 6 | 2.502105  | 3.747512  | -0.642854 | 6 | 2.592855  | 3.287402  | -1.409006 |
| 6 | 3.263384  | 3.5983    | -1.81845  | 6 | 3.250057  | 2.890163  | -2.589578 |
| 1 | 3.358882  | 4.477325  | -2.443696 | 1 | 3.37861   | 3.652126  | -3.348064 |
| 6 | 3.975753  | 2.464029  | -2.229063 | 6 | 3.842     | 1.647781  | -2.849656 |
| 6 | 4.811508  | 2.553025  | -3.479394 | 6 | 4.601583  | 1.465806  | -4.137238 |
| 1 | 5.855142  | 2.349607  | -3.223949 | 1 | 5.639504  | 1.212305  | -3.904333 |
| 1 | 4.742407  | 3.525917  | -3.966942 | 1 | 4.580742  | 2.353016  | -4.770781 |
| 1 | 4.498591  | 1.770136  | -4.175959 | 1 | 4.183281  | 0.615055  | -4.682505 |
| 6 | -0.767299 | 1.491012  | -3.440836 | 6 | -1.065958 | 0.92357   | -3.639145 |
| 6 | 0.524065  | 1.488741  | -2.923068 | 6 | 0.252835  | 0.889521  | -3.197244 |
| 1 | 1.351618  | 1.920102  | -3.478537 | 1 | 1.072462  | 1.159596  | -3.856618 |
| 6 | -0.207578 | 0.441018  | -1.02634  | 6 | -0.430762 | 0.210193  | -1.122609 |
| 6 | -0.006032 | -0.107639 | 0.280626  | 6 | -0.185057 | -0.14497  | 0.242389  |
| 6 | 1.262284  | -0.114355 | 0.899373  | 6 | 1.118907  | -0.169978 | 0.782432  |
| 6 | 0.214864  | -1.192555 | 2.830273  | 6 | 0.122807  | -0.809909 | 2.923844  |
| 6 | 0.388314  | -1.783898 | 4.230634  | 6 | 0.342847  | -1.165987 | 4.395583  |
| 6 | 1.343641  | -2.985472 | 4.157457  | 6 | 1.189935  | -2.444697 | 4.486465  |
| 1 | 1.481194  | -3.419176 | 5.154028  | 1 | 1.363015  | -2.709158 | 5.535226  |
| 1 | 0.941416  | -3.760735 | 3.498533  | 1 | 0.680074  | -3.282537 | 4.001712  |
| 6 | 0.980338  | -0.715887 | 5.163018  | 6 | 1.080953  | -0.011541 | 5.090629  |
| 1 | 0.320006  | 0.154049  | 5.225518  | 1 | 0.496715  | 0.911671  | 5.035289  |
| 1 | 1.956774  | -0.37093  | 4.814464  | 1 | 2.054285  | 0.180753  | 4.632783  |
| 1 | 1.107064  | -1.123755 | 6.171723  | 1 | 1.246405  | -0.250436 | 6.146692  |
| 6 | 5.28004   | 2.079767  | 1.846052  | 6 | 5.337774  | 1.709579  | 1.22664   |
| 1 | 4.645918  | 2.961787  | 1.830355  | 1 | 4.798295  | 2.648239  | 1.140824  |
| 6 | 6.508784  | 2.049852  | 2.478991  | 6 | 6.596069  | 1.625205  | 1.794316  |
| 6 | 7.207509  | 0.84764   | 2.403082  | 6 | 7.190048  | 0.36506   | 1.838633  |
| 1 | 8.185473  | 0.745129  | 2.868929  | 1 | 8.182277  | 0.241574  | 2.266121  |
| 6 | 5.546126  | -0.124588 | 1.195589  | 6 | 5.368849  | -0.573902 | 0.844542  |
| 6 | 4.944007  | -1.250833 | 0.506336  | 6 | 4.629684  | -1.713008 | 0.336291  |
| 6 | 3.662162  | -1.06406  | -0.059936 | 6 | 3.336857  | -1.480342 | -0.187228 |
| 6 | 3.729853  | -3.393662 | -0.822258 | 6 | 3.156437  | -3.884792 | -0.635786 |
| 6 | 5.000428  | -3.537815 | -0.24933  | 6 | 4.443602  | -4.072569 | -0.114989 |
| 6 | 5.601335  | -2.479079 | 0.406397  | 6 | 5.17149   | -3.000533 | 0.366229  |
| 1 | 6.58567   | -2.583921 | 0.850665  | 1 | 6.168257  | -3.141062 | 0.771065  |
| 6 | 1.693037  | -4.843053 | -0.826402 | 6 | 1.028349  | -5.148877 | -0.309936 |

|    |           |           |           |    |           |           |           |
|----|-----------|-----------|-----------|----|-----------|-----------|-----------|
| 1  | 1.870786  | -5.13422  | 0.213224  | 1  | 1.274582  | -5.340797 | 0.738731  |
| 1  | 1.175662  | -5.668499 | -1.32832  | 1  | 0.404625  | -5.97451  | -0.670702 |
| 1  | 1.024154  | -3.978839 | -0.820388 | 1  | 0.434949  | -4.23206  | -0.350716 |
| 6  | 3.854998  | -5.823157 | -1.56091  | 6  | 3.039985  | -6.384348 | -1.088346 |
| 1  | 4.066666  | -6.184255 | -0.549967 | 1  | 3.303074  | -6.650964 | -0.060319 |
| 1  | 4.806557  | -5.680691 | -2.08206  | 1  | 3.955665  | -6.378991 | -1.687586 |
| 1  | 3.304561  | -6.610356 | -2.08488  | 1  | 2.392696  | -7.175512 | -1.478765 |
| 6  | 3.019869  | -4.541657 | -1.541284 | 6  | 2.306166  | -5.043642 | -1.157324 |
| 6  | 2.734564  | -4.132883 | -2.994538 | 6  | 1.926805  | -4.780112 | -2.622509 |
| 1  | 2.218216  | -4.94341  | -3.520723 | 1  | 1.316368  | -5.603961 | -3.008214 |
| 1  | 3.664934  | -3.917269 | -3.528463 | 1  | 2.820561  | -4.695483 | -3.247877 |
| 1  | 2.105441  | -3.240753 | -3.047006 | 1  | 1.354258  | -3.855653 | -2.731358 |
| 77 | -2.788905 | -0.609406 | -0.269073 | 77 | -3.029914 | -0.466785 | -0.062323 |
| 7  | -5.765641 | -1.164869 | 2.627418  | 7  | -5.790729 | -0.281342 | 3.085591  |
| 7  | -4.059245 | -1.549231 | 1.02577   | 7  | -4.270185 | -1.066998 | 1.444834  |
| 7  | -1.489049 | 0.385342  | -1.491282 | 7  | -1.741056 | 0.197983  | -1.502942 |
| 8  | -2.174093 | -2.453848 | -1.260331 | 8  | -2.643327 | -2.499797 | -0.755885 |
| 8  | -4.419181 | -0.542068 | -1.714288 | 8  | -4.743332 | -0.483671 | -1.408869 |
| 6  | -2.072251 | -4.241156 | -2.764607 | 6  | -2.778798 | -4.499563 | -1.961134 |
| 1  | -1.938153 | -4.947382 | -1.940673 | 1  | -2.618249 | -5.065973 | -1.039976 |
| 1  | -2.628374 | -4.721292 | -3.570297 | 1  | -3.437664 | -5.058978 | -2.625932 |
| 1  | -1.071857 | -3.981504 | -3.12342  | 1  | -1.800222 | -4.388544 | -2.438067 |
| 6  | -2.746616 | -2.995124 | -2.250054 | 6  | -3.315315 | -3.132637 | -1.621488 |
| 6  | -3.917854 | -2.560282 | -2.890668 | 6  | -4.480418 | -2.695904 | -2.271812 |
| 1  | -4.275835 | -3.173897 | -3.707682 | 1  | -4.935669 | -3.393558 | -2.96334  |
| 6  | -4.669761 | -1.410529 | -2.5986   | 6  | -5.11764  | -1.452204 | -2.130552 |
| 6  | -5.908268 | -1.139084 | -3.413393 | 6  | -6.377904 | -1.200369 | -2.91772  |
| 1  | -5.824807 | -0.153466 | -3.879939 | 1  | -6.23955  | -0.317801 | -3.548699 |
| 1  | -6.082471 | -1.890615 | -4.183886 | 1  | -6.665576 | -2.048122 | -3.540109 |
| 1  | -6.771589 | -1.100193 | -2.74316  | 1  | -7.189517 | -0.968524 | -2.22245  |
| 6  | -1.769194 | 0.912959  | -2.680061 | 6  | -2.05728  | 0.558713  | -2.743875 |
| 1  | -2.802398 | 0.86257   | -3.004389 | 1  | -3.110415 | 0.550327  | -3.000913 |
| 6  | -1.162449 | -0.641437 | 0.893275  | 6  | -1.335756 | -0.461759 | 0.997884  |
| 6  | -1.022095 | -1.155133 | 2.184998  | 6  | -1.148261 | -0.765396 | 2.349348  |
| 1  | 2.326947  | -2.702165 | 3.77431   | 1  | 2.163377  | -2.324411 | 4.004687  |
| 6  | -0.93372  | -2.260987 | 4.834636  | 6  | -0.969812 | -1.408483 | 5.142786  |
| 1  | -1.655834 | -1.444348 | 4.926778  | 1  | -1.614065 | -0.524326 | 5.129431  |
| 1  | -1.388563 | -3.057485 | 4.238068  | 1  | -1.528125 | -2.2487   | 4.719081  |
| 1  | -0.752371 | -2.661182 | 5.836903  | 1  | -0.754473 | -1.647979 | 6.188559  |
| 6  | -4.211097 | -2.867701 | 1.157864  | 6  | -4.522934 | -2.329737 | 1.791874  |
| 1  | -3.555201 | -3.480919 | 0.549943  | 1  | -3.977525 | -3.086645 | 1.239278  |
| 6  | -5.150515 | -3.390853 | 2.026427  | 6  | -5.423554 | -2.622077 | 2.798613  |
| 1  | -5.277495 | -4.459693 | 2.137549  | 1  | -5.631976 | -3.644443 | 3.085337  |
| 6  | -5.9171   | -2.476281 | 2.740217  | 6  | -6.041486 | -1.539799 | 3.415705  |

|    |           |           |           |    |           |           |           |
|----|-----------|-----------|-----------|----|-----------|-----------|-----------|
| 1  | -6.683194 | -2.813125 | 3.434915  | 1  | -6.767073 | -1.691864 | 4.211525  |
| 6  | -4.838334 | -0.721228 | 1.781087  | 6  | -4.908735 | -0.062712 | 2.11238   |
| 6  | -4.546069 | 0.683625  | 1.609812  | 6  | -4.52198  | 1.26453   | 1.691394  |
| 6  | -3.509866 | 0.982513  | 0.696018  | 6  | -3.550867 | 1.319727  | 0.665291  |
| 6  | -3.783065 | 3.345487  | 1.280254  | 6  | -3.607834 | 3.761611  | 0.8514    |
| 6  | -4.826108 | 3.006481  | 2.152967  | 6  | -4.586312 | 3.660198  | 1.84955   |
| 6  | -5.201813 | 1.685891  | 2.322761  | 6  | -5.037498 | 2.422239  | 2.271225  |
| 1  | -5.997038 | 1.413195  | 3.009082  | 1  | -5.785481 | 2.334597  | 3.05264   |
| 6  | -3.361328 | 5.180361  | -0.377356 | 6  | -3.255159 | 5.25532   | -1.129466 |
| 1  | -4.383183 | 5.104527  | -0.760512 | 1  | -4.316648 | 5.203214  | -1.389145 |
| 1  | -3.023294 | 6.214195  | -0.507017 | 1  | -2.866895 | 6.22087   | -1.471109 |
| 1  | -2.72525  | 4.540617  | -0.99412  | 1  | -2.736842 | 4.470262  | -1.68579  |
| 6  | -4.152761 | 5.78687   | 1.893929  | 6  | -3.744773 | 6.292501  | 1.070781  |
| 1  | -5.199758 | 5.767697  | 1.576402  | 1  | -4.819467 | 6.308806  | 0.865832  |
| 1  | -4.115552 | 5.593443  | 2.970021  | 1  | -3.600838 | 6.275507  | 2.155115  |
| 1  | -3.773089 | 6.799624  | 1.727985  | 1  | -3.320906 | 7.229293  | 0.69669   |
| 6  | -3.302985 | 4.787657  | 1.106367  | 6  | -3.055141 | 5.110402  | 0.387013  |
| 6  | -1.853412 | 4.889892  | 1.606704  | 6  | -1.555489 | 5.173286  | 0.714843  |
| 1  | -1.47947  | 5.911798  | 1.4784    | 1  | -1.132304 | 6.124083  | 0.371953  |
| 1  | -1.790327 | 4.634065  | 2.66845   | 1  | -1.390522 | 5.09486   | 1.793347  |
| 1  | -1.188813 | 4.211107  | 1.066185  | 1  | -1.001955 | 4.359693  | 0.238998  |
| 1  | 5.526801  | -4.482365 | -0.310867 | 1  | 4.883102  | -5.061765 | -0.07986  |
| 1  | -5.342945 | 3.775283  | 2.713659  | 1  | -4.994699 | 4.55131   | 2.309511  |
| 1  | -1.896656 | -1.547557 | 2.689042  | 1  | -2.015348 | -0.983829 | 2.960304  |
| 6  | 3.092243  | -2.154419 | -0.715015 | 6  | 2.635007  | -2.588222 | -0.659266 |
| 1  | 2.102556  | -2.031016 | -1.143546 | 1  | 1.634093  | -2.428897 | -1.048024 |
| 6  | -3.147819 | 2.322385  | 0.568162  | 6  | -3.111265 | 2.58484   | 0.280061  |
| 1  | -2.333    | 2.57984   | -0.101585 | 1  | -2.346846 | 2.658939  | -0.487064 |
| 6  | 1.347816  | -0.701655 | 2.158324  | 6  | 1.243527  | -0.54878  | 2.115776  |
| 1  | 2.321426  | -0.785935 | 2.631036  | 1  | 2.237197  | -0.644045 | 2.542141  |
| 17 | -1.117016 | 2.181616  | -4.985325 | 17 | -1.462515 | 1.397141  | -5.252226 |
| 1  | 6.903746  | 2.912834  | 2.999223  | 17 | 7.399273  | 3.021711  | 2.415808  |

Ir3-Cl-3MC

|    |          |          |           |    |           |           |           |
|----|----------|----------|-----------|----|-----------|-----------|-----------|
| 77 | 2.762338 | 0.759285 | -0.060025 | 77 | -2.676119 | -0.482155 | -0.277136 |
| 7  | 6.029268 | 0.058259 | 2.761418  | 7  | -6.130397 | 0.160036  | 2.456421  |
| 7  | 4.288626 | 1.162364 | 1.599736  | 7  | -4.315213 | -0.982909 | 1.445629  |
| 7  | 0.715712 | 0.470366 | -2.039832 | 7  | -0.673188 | 0.172559  | -2.015258 |
| 8  | 2.089374 | 2.792845 | -0.298748 | 8  | -2.06538  | -2.41201  | -0.999056 |
| 8  | 4.311682 | 1.253105 | -1.446812 | 8  | -4.381074 | -0.767991 | -1.547184 |
| 6  | 1.795775 | 4.957728 | -1.143972 | 6  | -1.874627 | -4.391733 | -2.2314   |
| 1  | 0.795164 | 4.811529 | -1.562935 | 1  | -0.894988 | -4.159131 | -2.65955  |
| 1  | 2.314234 | 5.717338 | -1.729842 | 1  | -2.42861  | -5.017574 | -2.931719 |
| 1  | 1.663072 | 5.307198 | -0.117444 | 1  | -1.696052 | -4.943544 | -1.305189 |
| 6  | 2.520899 | 3.638206 | -1.13445  | 6  | -2.592012 | -3.10772  | -1.912196 |

Ir3-2Cl-3MC



|   |           |           |           |   |           |           |           |
|---|-----------|-----------|-----------|---|-----------|-----------|-----------|
| 6 | 3.589471  | 3.453707  | -2.025968 | 6 | -3.757039 | -2.791505 | -2.628691 |
| 1 | 3.827334  | 4.283692  | -2.679102 | 1 | -4.074308 | -3.494919 | -3.387717 |
| 6 | 4.400651  | 2.317482  | -2.13166  | 6 | -4.569423 | -1.673316 | -2.413527 |
| 6 | 5.517311  | 2.314391  | -3.139779 | 6 | -5.804872 | -1.493084 | -3.252734 |
| 1 | 6.459857  | 2.095192  | -2.631303 | 1 | -6.676757 | -1.417579 | -2.597375 |
| 1 | 5.603522  | 3.258059  | -3.679283 | 1 | -5.953691 | -2.30546  | -3.964753 |
| 1 | 5.343448  | 1.502949  | -3.852699 | 1 | -5.728749 | -0.545407 | -3.793797 |
| 6 | -0.83977  | 0.69069   | -3.833026 | 6 | 0.843665  | 0.399019  | -3.83714  |
| 1 | -1.039384 | 0.919201  | -4.870029 | 1 | 1.02038   | 0.451348  | -4.901843 |
| 6 | 0.444104  | 0.724569  | -3.294418 | 6 | -0.433221 | 0.253268  | -3.299822 |
| 6 | -0.297904 | 0.13987   | -1.231393 | 6 | 0.364762  | 0.238777  | -1.17354  |
| 6 | -0.116535 | -0.13731  | 0.165477  | 6 | 0.207549  | 0.106192  | 0.244816  |
| 6 | 1.139933  | -0.034476 | 0.812048  | 6 | -1.050617 | -0.164857 | 0.840878  |
| 6 | 0.027316  | -0.727504 | 2.888706  | 6 | 0.102196  | -0.193475 | 3.010563  |
| 6 | 0.157988  | -1.043441 | 4.379568  | 6 | 0.000039  | -0.391061 | 4.524061  |
| 6 | 1.10337   | -2.24101  | 4.561586  | 6 | -0.961506 | 0.654108  | 5.110093  |
| 1 | 1.215003  | -2.475346 | 5.625797  | 1 | -1.053523 | 0.516503  | 6.192823  |
| 1 | 0.708816  | -3.126874 | 4.055297  | 1 | -0.594552 | 1.667774  | 4.923925  |
| 6 | 0.73551   | 0.180198  | 5.107448  | 6 | -0.539727 | -1.801304 | 4.809193  |
| 1 | 0.078316  | 1.047058  | 4.991419  | 1 | 0.131161  | -2.562961 | 4.401274  |
| 1 | 1.721013  | 0.4527    | 4.721165  | 1 | -1.526672 | -1.955752 | 4.365693  |
| 1 | 0.839346  | -0.031325 | 6.17713   | 1 | -0.62514  | -1.962163 | 5.889344  |
| 6 | 4.520352  | 2.281383  | 2.276935  | 6 | -4.720171 | -2.107103 | 1.995207  |
| 1 | 3.88207   | 3.127184  | 2.035891  | 6 | -5.850911 | -2.188343 | 2.794409  |
| 6 | 5.5194    | 2.346094  | 3.231219  | 1 | -6.174523 | -3.119755 | 3.237756  |
| 1 | 5.717344  | 3.251541  | 3.790418  | 6 | -6.522352 | -0.989232 | 2.986713  |
| 6 | 6.253513  | 1.17948   | 3.428528  | 1 | -7.418637 | -0.956398 | 3.602212  |
| 1 | 7.059218  | 1.148551  | 4.159196  | 6 | -5.035709 | 0.135315  | 1.691861  |
| 6 | 5.044201  | 0.072002  | 1.855738  | 6 | -4.549018 | 1.36646   | 1.08111   |
| 6 | 4.714746  | -1.116986 | 1.087064  | 6 | -3.437031 | 1.307831  | 0.212636  |
| 6 | 3.650236  | -1.033076 | 0.160973  | 6 | -3.599944 | 3.739802  | -0.081834 |
| 6 | 4.046466  | -3.382579 | -0.417315 | 6 | -4.701669 | 3.754159  | 0.780502  |
| 6 | 5.093355  | -3.426278 | 0.512193  | 6 | -5.172385 | 2.583585  | 1.352957  |
| 6 | 5.424876  | -2.307308 | 1.254806  | 1 | -6.0287   | 2.596665  | 2.018353  |
| 1 | 6.238013  | -2.33527  | 1.972564  | 6 | -1.593544 | 5.212268  | -0.279221 |
| 6 | 2.180931  | -4.959215 | -0.946825 | 1 | -1.538587 | 5.340262  | 0.805922  |
| 1 | 2.059704  | -5.219348 | 0.10891   | 1 | -1.173976 | 6.107861  | -0.750999 |
| 1 | 1.870636  | -5.820192 | -1.549357 | 1 | -0.96225  | 4.359692  | -0.542146 |
| 1 | 1.502279  | -4.130145 | -1.162436 | 6 | -3.847838 | 6.254848  | -0.353499 |
| 6 | 4.510634  | -5.822151 | -0.965616 | 1 | -3.828029 | 6.438073  | 0.725028  |
| 1 | 4.433238  | -6.137214 | 0.079424  | 1 | -4.892286 | 6.179295  | -0.671122 |
| 1 | 5.564899  | -5.635344 | -1.191353 | 1 | -3.414714 | 7.130982  | -0.845431 |
| 1 | 4.181155  | -6.659131 | -1.588775 | 6 | -3.047183 | 5.007679  | -0.73261  |
| 6 | 3.642041  | -4.596463 | -1.254941 | 6 | -3.090339 | 4.856245  | -2.260807 |

|    |           |           |           |    |           |           |           |
|----|-----------|-----------|-----------|----|-----------|-----------|-----------|
| 6  | 3.779795  | -4.252011 | -2.745881 | 1  | -2.69379  | 5.757328  | -2.741075 |
| 1  | 3.491009  | -5.111165 | -3.361069 | 1  | -4.117138 | 4.707796  | -2.607777 |
| 1  | 4.813151  | -3.98841  | -2.989884 | 1  | -2.49751  | 4.003833  | -2.60174  |
| 1  | 3.145768  | -3.407328 | -3.026054 | 77 | 3.012425  | 0.685462  | -0.1081   |
| 77 | -2.916612 | -0.671609 | -0.307037 | 7  | 6.027168  | -0.261054 | 2.645792  |
| 7  | -5.914036 | -0.611634 | 2.621926  | 7  | 4.337276  | 0.879506  | 1.435059  |
| 7  | -4.217276 | -1.324969 | 1.12702   | 7  | 1.643171  | 0.427236  | -1.605902 |
| 7  | -1.581268 | 0.03484   | -1.680992 | 8  | 2.512219  | 2.809637  | -0.145756 |
| 8  | -2.356942 | -2.683037 | -0.93421  | 8  | 4.636947  | 1.196445  | -1.469086 |
| 8  | -4.55402  | -0.838733 | -1.740453 | 6  | 2.52479   | 5.089859  | -0.667372 |
| 6  | -2.279508 | -4.70999  | -2.095906 | 1  | 2.347909  | 5.316097  | 0.387123  |
| 1  | -2.166936 | -5.260471 | -1.157927 | 1  | 3.154049  | 5.862855  | -1.109806 |
| 1  | -2.838328 | -5.315654 | -2.809991 | 1  | 1.548285  | 5.100682  | -1.160958 |
| 1  | -1.270848 | -4.537215 | -2.482773 | 6  | 3.12057   | 3.71091   | -0.791778 |
| 6  | -2.931389 | -3.379268 | -1.819816 | 6  | 4.264973  | 3.552306  | -1.589942 |
| 6  | -4.087561 | -3.040597 | -2.541656 | 1  | 4.663602  | 4.450522  | -2.044483 |
| 1  | -4.454179 | -3.782624 | -3.239729 | 6  | 4.944246  | 2.355561  | -1.86919  |
| 6  | -4.820526 | -1.84552  | -2.457208 | 6  | 6.171472  | 2.416256  | -2.74235  |
| 6  | -6.059875 | -1.706015 | -3.30395  | 1  | 6.054885  | 1.722858  | -3.579666 |
| 1  | -5.988635 | -0.794375 | -3.903407 | 1  | 6.371113  | 3.418039  | -3.123825 |
| 1  | -6.223816 | -2.561728 | -3.959577 | 1  | 7.034138  | 2.072258  | -2.16441  |
| 1  | -6.92562  | -1.585329 | -2.646308 | 6  | 1.870997  | 0.492023  | -2.917999 |
| 6  | -1.840964 | 0.321895  | -2.956564 | 1  | 2.906996  | 0.621806  | -3.211049 |
| 1  | -2.880369 | 0.241688  | -3.255174 | 6  | 1.401073  | 0.244539  | 0.98371   |
| 6  | -1.294177 | -0.523524 | 0.844512  | 6  | 1.313949  | 0.073222  | 2.372351  |
| 6  | -1.191336 | -0.788852 | 2.215384  | 1  | -1.961071 | 0.577244  | 4.675194  |
| 1  | 2.097562  | -2.041604 | 4.154352  | 6  | 1.350097  | -0.246481 | 5.228086  |
| 6  | -1.184587 | -1.390895 | 5.025409  | 1  | 2.073329  | -0.988149 | 4.876233  |
| 1  | -1.900403 | -0.56745  | 4.943647  | 1  | 1.779058  | 0.749828  | 5.08325   |
| 1  | -1.632675 | -2.282639 | 4.576558  | 1  | 1.218043  | -0.396701 | 6.303895  |
| 1  | -1.034439 | -1.596628 | 6.089667  | 6  | 4.558084  | 1.989247  | 2.14108   |
| 6  | -4.409372 | -2.59401  | 1.489117  | 1  | 3.932633  | 2.838659  | 1.889766  |
| 1  | -3.770851 | -3.323156 | 1.002743  | 6  | 5.526199  | 2.022365  | 3.126988  |
| 6  | -5.365031 | -2.926554 | 2.430668  | 1  | 5.709179  | 2.919542  | 3.703576  |
| 1  | -5.524662 | -3.954277 | 2.72933   | 6  | 6.245954  | 0.850388  | 3.333091  |
| 6  | -6.103767 | -1.877029 | 2.966137  | 1  | 7.029996  | 0.803033  | 4.085418  |
| 1  | -6.879305 | -2.062151 | 3.705914  | 6  | 5.075768  | -0.233388 | 1.714448  |
| 6  | -4.973652 | -0.353384 | 1.715175  | 6  | 4.712444  | -1.393252 | 0.933137  |
| 6  | -4.641794 | 0.988445  | 1.293139  | 6  | 3.657381  | -1.201817 | 0.011383  |
| 6  | -3.595971 | 1.088954  | 0.346582  | 6  | 3.831921  | -3.577167 | -0.560296 |
| 6  | -3.811729 | 3.525173  | 0.486236  | 6  | 4.892752  | -3.714779 | 0.345353  |
| 6  | -4.864933 | 3.377401  | 1.399213  | 6  | 5.326658  | -2.634264 | 1.092132  |
| 6  | -5.273631 | 2.11995   | 1.805999  | 1  | 6.137312  | -2.735744 | 1.806494  |
| 1  | -6.077261 | 1.996926  | 2.524923  | 6  | 3.30861   | -4.423115 | -2.863272 |

|    |            |           |           |    |             |           |           |
|----|------------|-----------|-----------|----|-------------|-----------|-----------|
| 6  | -3.30243   | 5.009341  | -1.472901 | 1  | 4.326502    | -4.208803 | -3.202493 |
| 1  | -4.31593   | 4.885848  | -1.865985 | 1  | 2.925769    | -5.269555 | -3.443414 |
| 1  | -2.933226  | 5.993175  | -1.78167  | 1  | 2.688452    | -3.553212 | -3.093116 |
| 1  | -2.667742  | 4.252442  | -1.940179 | 6  | 4.111623    | -6.034415 | -1.157171 |
| 6  | -4.138238  | 6.044825  | 0.619416  | 1  | 5.155262    | -5.89824  | -1.45667  |
| 1  | -5.178771  | 5.980668  | 0.28667   | 1  | 4.092533    | -6.365258 | -0.114571 |
| 1  | -4.126837  | 6.06229   | 1.713099  | 1  | 3.69314     | -6.841764 | -1.76585  |
| 1  | -3.735074  | 7.000606  | 0.27105   | 6  | 3.290763    | -4.760282 | -1.364695 |
| 6  | -3.292817  | 4.899394  | 0.05919   | 6  | 1.846858    | -5.038719 | -0.919248 |
| 6  | -1.854693  | 5.063908  | 0.575442  | 1  | 1.425941    | -5.870486 | -1.495146 |
| 1  | -1.452024  | 6.03644   | 0.270603  | 1  | 1.81398     | -5.305787 | 0.141118  |
| 1  | -1.827313  | 5.009852  | 1.667776  | 1  | 1.204206    | -4.166069 | -1.059219 |
| 1  | -1.193401  | 4.28348   | 0.190871  | 1  | -5.204572   | 4.68532   | 1.011553  |
| 1  | 5.657337   | -4.338917 | 0.660615  | 1  | 5.378927    | -4.673203 | 0.478599  |
| 1  | -5.364502  | 4.247891  | 1.805695  | 1  | 2.220203    | 0.147189  | 2.961304  |
| 1  | -2.086634  | -1.063072 | 2.759743  | 6  | -2.994702   | 2.507895  | -0.346414 |
| 6  | 3.349633   | -2.180478 | -0.570874 | 1  | -2.141884   | 2.468601  | -1.017035 |
| 1  | 2.531157   | -2.130715 | -1.282558 | 6  | 3.23602     | -2.319436 | -0.706312 |
| 6  | -3.200236  | 2.373713  | -0.021612 | 1  | 2.405235    | -2.210798 | -1.396188 |
| 1  | -2.376585  | 2.483255  | -0.719927 | 6  | -1.062211   | -0.286387 | 2.231606  |
| 6  | 1.179227   | -0.384696 | 2.162015  | 1  | -2.012017   | -0.477935 | 2.719363  |
| 1  | 2.138301   | -0.380142 | 2.669473  | 17 | -1.797459   | 0.184644  | -4.363961 |
| 17 | 1.777004   | 1.10708   | -4.335514 | 17 | -3.768931   | -3.522754 | 1.711178  |
|    | Ir4-Cl-3MC |           |           |    | Ir4-2Cl-3MC |           |           |
| 77 | -2.995226  | -0.786869 | -0.114647 | 77 | -2.767983   | -0.676252 | -0.361039 |
| 7  | -6.928615  | 0.060367  | 1.514528  | 7  | -6.767269   | 0.265252  | 1.056531  |
| 7  | -4.993759  | -1.130656 | 0.85774   | 7  | -4.833837   | -0.977175 | 0.508183  |
| 7  | -0.896903  | -0.902292 | -1.850905 | 7  | -0.588343   | -0.792562 | -1.97504  |
| 8  | -2.508599  | -2.89517  | -0.257546 | 8  | -2.33477    | -2.791208 | -0.529851 |
| 8  | -4.095162  | -1.019354 | -1.963423 | 8  | -3.787262   | -0.83483  | -2.258372 |
| 6  | -2.18372   | -5.032582 | -1.150608 | 6  | -2.016128   | -4.912937 | -1.462358 |
| 1  | -1.091608  | -4.973611 | -1.19518  | 1  | -0.921885   | -4.884599 | -1.477901 |
| 1  | -2.536428  | -5.688727 | -1.946969 | 1  | -2.364737   | -5.545568 | -2.279242 |
| 1  | -2.44104   | -5.459739 | -0.178439 | 1  | -2.311272   | -5.3479   | -0.504712 |
| 6  | -2.745054  | -3.637543 | -1.24834  | 6  | -2.535113   | -3.501393 | -1.552052 |
| 6  | -3.470302  | -3.289249 | -2.404543 | 6  | -3.185676   | -3.102983 | -2.736256 |
| 1  | -3.594644  | -4.068746 | -3.145926 | 1  | -3.286742   | -3.858347 | -3.505614 |
| 6  | -4.106695  | -2.070193 | -2.673847 | 6  | -3.781507   | -1.86336  | -3.001983 |
| 6  | -4.917811  | -1.949231 | -3.938639 | 6  | -4.522034   | -1.686374 | -4.302446 |
| 1  | -5.958564  | -1.742997 | -3.673255 | 1  | -5.572054   | -1.470538 | -4.085498 |
| 1  | -4.875811  | -2.84665  | -4.556812 | 1  | -4.461971   | -2.563693 | -4.947302 |
| 1  | -4.563105  | -1.089048 | -4.513251 | 1  | -4.123426   | -0.814238 | -4.82806  |
| 6  | 0.610862   | -1.174251 | -3.659321 | 6  | 1.00971     | -1.028868 | -3.70947  |
| 1  | 0.806404   | -1.321788 | -4.711728 | 1  | 1.258778    | -1.139345 | -4.755107 |

|   |           |           |           |   |           |           |           |
|---|-----------|-----------|-----------|---|-----------|-----------|-----------|
| 6 | -0.669902 | -1.123563 | -3.134379 | 6 | -0.296415 | -0.971766 | -3.252226 |
| 1 | -1.541873 | -1.255839 | -3.768422 | 1 | -1.13498  | -1.062686 | -3.936631 |
| 6 | 0.148139  | -0.747274 | -1.038964 | 6 | 0.41449   | -0.690168 | -1.103349 |
| 6 | -0.05083  | -0.383426 | 0.328653  | 6 | 0.149926  | -0.366241 | 0.263146  |
| 6 | -1.347164 | -0.172474 | 0.854018  | 6 | -1.167521 | -0.133232 | 0.721729  |
| 6 | -1.425706 | 0.361058  | 2.136946  | 6 | -1.305018 | 0.365174  | 2.013536  |
| 1 | -2.403077 | 0.599023  | 2.544068  | 1 | -2.297182 | 0.619991  | 2.371353  |
| 6 | -0.278923 | 0.612885  | 2.912331  | 6 | -0.197772 | 0.558518  | 2.860361  |
| 6 | -0.453502 | 1.20242   | 4.313294  | 6 | -0.4359   | 1.10524   | 4.269346  |
| 6 | -1.145839 | 2.569936  | 4.199662  | 6 | -1.097825 | 2.488536  | 4.168069  |
| 1 | -1.282418 | 3.007339  | 5.194602  | 1 | -1.283808 | 2.891517  | 5.169443  |
| 1 | -0.542926 | 3.259863  | 3.601911  | 1 | -0.450246 | 3.188813  | 3.632252  |
| 6 | -1.320553 | 0.25859   | 5.160261  | 6 | -1.362868 | 0.149076  | 5.035357  |
| 1 | -0.8482   | -0.723907 | 5.254022  | 1 | -0.913815 | -0.845373 | 5.116563  |
| 1 | -2.31046  | 0.113659  | 4.721036  | 1 | -2.331078 | 0.039783  | 4.54082   |
| 1 | -1.45577  | 0.671462  | 6.165767  | 1 | -1.542795 | 0.527826  | 6.047238  |
| 6 | -5.523772 | -2.27117  | 1.287735  | 6 | -5.434613 | -2.10089  | 0.889229  |
| 1 | -4.910423 | -3.159079 | 1.163503  | 1 | -4.850136 | -3.011666 | 0.796532  |
| 6 | -6.784041 | -2.302278 | 1.855211  | 6 | -6.727693 | -2.103683 | 1.37364   |
| 1 | -7.226962 | -3.223406 | 2.21123   | 1 | -7.229794 | -3.007112 | 1.689262  |
| 6 | -7.449851 | -1.08174  | 1.934388  | 6 | -7.340061 | -0.851628 | 1.41915   |
| 1 | -8.450683 | -1.023355 | 2.357351  | 6 | -5.506061 | 0.190235  | 0.608128  |
| 6 | -5.699816 | 0.016562  | 0.988442  | 6 | -4.776316 | 1.378287  | 0.220261  |
| 6 | -5.026845 | 1.219401  | 0.53483   | 6 | -3.438116 | 1.214501  | -0.215009 |
| 6 | -3.712765 | 1.087323  | 0.024381  | 6 | -2.741956 | 2.375279  | -0.551868 |
| 6 | -3.075091 | 2.259127  | -0.382489 | 1 | -1.709    | 2.274705  | -0.869142 |
| 1 | -2.060452 | 2.18222   | -0.759844 | 6 | -3.309259 | 3.651474  | -0.482073 |
| 6 | -3.678475 | 3.518874  | -0.31063  | 6 | -4.640293 | 3.766312  | -0.058178 |
| 6 | -4.983186 | 3.603324  | 0.192406  | 1 | -5.114447 | 4.737681  | 0.006464  |
| 1 | -5.484425 | 4.560736  | 0.261977  | 6 | -5.365312 | 2.643443  | 0.290789  |
| 6 | -5.649042 | 2.466962  | 0.612279  | 1 | -6.39434  | 2.726048  | 0.624855  |
| 1 | -6.65824  | 2.524458  | 1.006561  | 6 | -1.26736  | 4.953924  | 0.118244  |
| 6 | -1.648421 | 4.904663  | 0.122788  | 1 | -1.610651 | 5.058462  | 1.151865  |
| 1 | -1.931028 | 5.032675  | 1.172084  | 1 | -0.646565 | 5.822786  | -0.125645 |
| 1 | -1.070747 | 5.783162  | -0.18517  | 1 | -0.637927 | 4.062295  | 0.064936  |
| 1 | -0.995467 | 4.030802  | 0.058239  | 6 | -3.246824 | 6.179841  | -0.74847  |
| 6 | -3.717976 | 6.038572  | -0.652912 | 1 | -3.605887 | 6.363859  | 0.26854   |
| 1 | -4.018548 | 6.243004  | 0.379075  | 1 | -4.107079 | 6.190083  | -1.424827 |
| 1 | -4.619142 | 5.999176  | -1.272613 | 1 | -2.59734  | 7.015809  | -1.025074 |
| 1 | -3.116492 | 6.886051  | -0.995438 | 6 | -2.461155 | 4.870604  | -0.845852 |
| 6 | -2.896033 | 4.752858  | -0.761456 | 6 | -1.948147 | 4.727356  | -2.286625 |
| 6 | -2.468235 | 4.582037  | -2.226887 | 1 | -1.329537 | 5.59073   | -2.553864 |
| 1 | -1.906534 | 5.461006  | -2.560924 | 1 | -2.782226 | 4.671237  | -2.992599 |
| 1 | -3.341605 | 4.466159  | -2.875779 | 1 | -1.340619 | 3.828142  | -2.413207 |

|    |           |           |           |    |           |           |           |
|----|-----------|-----------|-----------|----|-----------|-----------|-----------|
| 1  | -1.83047  | 3.70546   | -2.363432 | 77 | 2.991029  | -0.78402  | 0.233133  |
| 77 | 2.799208  | -0.717463 | 0.15264   | 7  | 5.589817  | 0.684194  | 3.163147  |
| 7  | 5.504628  | 0.963325  | 2.864884  | 7  | 4.082117  | -0.6774   | 1.943515  |
| 7  | 3.982322  | -0.500454 | 1.789721  | 7  | 1.742279  | -0.802057 | -1.449627 |
| 7  | 1.457967  | -0.842599 | -1.452828 | 8  | 2.396401  | -2.855161 | 0.542832  |
| 8  | 2.301789  | -2.795218 | 0.57026   | 8  | 4.841641  | -1.604257 | -0.591284 |
| 8  | 4.638043  | -1.504098 | -0.735583 | 6  | 2.331769  | -5.189281 | 0.452559  |
| 6  | 2.316539  | -5.131832 | 0.564024  | 1  | 1.345238  | -5.166698 | -0.01831  |
| 1  | 1.323724  | -5.173202 | 0.107376  | 1  | 2.888578  | -6.055587 | 0.093864  |
| 1  | 2.903211  | -5.991411 | 0.238227  | 1  | 2.1639    | -5.288659 | 1.529127  |
| 1  | 2.16681   | -5.183862 | 1.646371  | 6  | 3.03663   | -3.885179 | 0.177197  |
| 6  | 2.962038  | -3.815176 | 0.212899  | 6  | 4.304522  | -3.924115 | -0.416249 |
| 6  | 4.203057  | -3.83237  | -0.436007 | 1  | 4.706411  | -4.90502  | -0.636809 |
| 1  | 4.632189  | -4.806244 | -0.635519 | 6  | 5.123666  | -2.823329 | -0.732112 |
| 6  | 4.962404  | -2.716349 | -0.836592 | 6  | 6.485244  | -3.094105 | -1.31985  |
| 6  | 6.306034  | -2.961094 | -1.475204 | 1  | 7.237791  | -2.546125 | -0.74747  |
| 1  | 7.062733  | -2.368679 | -0.954764 | 1  | 6.737009  | -4.155043 | -1.335838 |
| 1  | 6.594391  | -4.01278  | -1.46715  | 1  | 6.514056  | -2.704128 | -2.341953 |
| 1  | 6.27711   | -2.605244 | -2.509608 | 6  | 2.006939  | -0.933539 | -2.74797  |
| 6  | 1.655277  | -1.021649 | -2.757417 | 6  | 1.285747  | -0.194956 | 1.074849  |
| 6  | 1.123165  | -0.154358 | 1.068879  | 6  | 1.07866   | 0.273176  | 2.377883  |
| 6  | 0.976508  | 0.348699  | 2.366538  | 1  | 1.935482  | 0.436168  | 3.019334  |
| 1  | 1.862972  | 0.555416  | 2.95271   | 1  | -2.053194 | 2.445874  | 3.639127  |
| 1  | -2.128367 | 2.491636  | 3.727589  | 6  | 0.860029  | 1.254573  | 5.068085  |
| 6  | 0.87959   | 1.401471  | 5.036931  | 1  | 1.371251  | 0.295351  | 5.195636  |
| 1  | 1.415969  | 0.456294  | 5.166309  | 1  | 1.55332   | 1.95371   | 4.591457  |
| 1  | 1.532796  | 2.097753  | 4.502966  | 1  | 0.630325  | 1.643242  | 6.064811  |
| 1  | 0.695153  | 1.817265  | 6.03218   | 6  | 4.173013  | -1.636521 | 2.864909  |
| 6  | 4.167637  | -1.419624 | 2.737485  | 1  | 3.575102  | -2.52209  | 2.681322  |
| 1  | 3.598033  | -2.334998 | 2.623066  | 6  | 4.981044  | -1.476612 | 3.97492   |
| 6  | 5.032974  | -1.186246 | 3.789688  | 1  | 5.05909   | -2.25005  | 4.727573  |
| 1  | 5.187618  | -1.926788 | 4.563317  | 6  | 5.680656  | -0.278442 | 4.069122  |
| 6  | 5.687322  | 0.040643  | 3.798019  | 1  | 6.340773  | -0.083764 | 4.911332  |
| 1  | 6.387565  | 0.292833  | 4.591164  | 6  | 4.791282  | 0.475059  | 2.118425  |
| 6  | 4.654401  | 0.683761  | 1.878722  | 6  | 4.580384  | 1.460254  | 1.083913  |
| 6  | 4.343128  | 1.61883   | 0.823283  | 6  | 3.679213  | 1.083507  | 0.061538  |
| 6  | 3.400147  | 1.166778  | -0.128379 | 6  | 3.435587  | 2.023083  | -0.938984 |
| 6  | 3.055148  | 2.057525  | -1.143936 | 1  | 2.739401  | 1.770684  | -1.732833 |
| 1  | 2.324143  | 1.747817  | -1.884535 | 6  | 4.056864  | 3.276437  | -0.964382 |
| 6  | 3.616056  | 3.334797  | -1.249413 | 6  | 4.947     | 3.604459  | 0.067785  |
| 6  | 4.553094  | 3.737118  | -0.287558 | 1  | 5.442042  | 4.567354  | 0.078637  |
| 1  | 5.004399  | 4.719921  | -0.340279 | 6  | 5.205321  | 2.706164  | 1.087142  |
| 6  | 4.912873  | 2.888577  | 0.743763  | 1  | 5.890929  | 2.95246   | 1.891529  |
| 1  | 5.634328  | 3.193054  | 1.49516   | 6  | 2.250031  | 4.550399  | -2.137601 |

|    |          |           |           |    |           |           |           |
|----|----------|-----------|-----------|----|-----------|-----------|-----------|
| 6  | 1.680803 | 4.472256  | -2.356346 | 1  | 1.934638  | 5.017518  | -1.200128 |
| 1  | 1.390189 | 4.950387  | -1.416483 | 1  | 2.018687  | 5.238088  | -2.958262 |
| 1  | 1.367171 | 5.119791  | -3.18221  | 1  | 1.649765  | 3.647889  | -2.277214 |
| 1  | 1.125971 | 3.534284  | -2.436578 | 6  | 4.511738  | 5.561439  | -1.987161 |
| 6  | 3.888183 | 5.608103  | -2.359405 | 1  | 4.245037  | 6.096478  | -1.070737 |
| 1  | 3.64632  | 6.153855  | -1.442388 | 1  | 5.595439  | 5.41102   | -1.995263 |
| 1  | 4.976219 | 5.516268  | -2.428871 | 1  | 4.261063  | 6.208355  | -2.833257 |
| 1  | 3.553389 | 6.216276  | -3.205194 | 6  | 3.753689  | 4.238745  | -2.114649 |
| 6  | 3.198499 | 4.243089  | -2.407738 | 6  | 4.160661  | 3.582064  | -3.442845 |
| 6  | 3.568906 | 3.567896  | -3.73734  | 1  | 3.946803  | 4.25633   | -4.279168 |
| 1  | 3.271548 | 4.202442  | -4.579258 | 1  | 5.230694  | 3.354488  | -3.451422 |
| 1  | 4.648023 | 3.399327  | -3.799965 | 1  | 3.621078  | 2.647424  | -3.615997 |
| 1  | 3.074235 | 2.599998  | -3.851732 | 17 | 3.64123   | -0.950187 | -3.264074 |
| 17 | 3.259935 | -1.029594 | -3.359662 | 17 | -8.975651 | -0.746666 | 1.994347  |

| Ir5-Cl-3MC |           |           |           | Ir5-2Cl-3MC |           |           |           |
|------------|-----------|-----------|-----------|-------------|-----------|-----------|-----------|
| 77         | -2.909085 | -0.812553 | 0.013649  | 77          | -2.75589  | -0.416533 | -0.335861 |
| 7          | -6.787922 | 0.018618  | 1.763126  | 7           | -6.642435 | 0.498172  | 1.377671  |
| 7          | -4.832806 | -1.142723 | 1.113242  | 7           | -4.763062 | -0.731799 | 0.647618  |
| 7          | -0.707965 | -1.088958 | -1.744425 | 7           | -0.501343 | -0.611877 | -1.983657 |
| 8          | -2.315964 | -2.895887 | 0.036858  | 8           | -2.379389 | -2.523433 | -0.641966 |
| 8          | -4.022557 | -1.261325 | -1.775074 | 8           | -3.838435 | -0.446826 | -2.193053 |
| 6          | -1.880698 | -5.079761 | -0.679297 | 6           | -2.124172 | -4.590397 | -1.706896 |
| 1          | -0.794033 | -4.958498 | -0.636672 | 1           | -1.038188 | -4.599353 | -1.574064 |
| 1          | -2.131855 | -5.792744 | -1.465075 | 1           | -2.37974  | -5.123541 | -2.622904 |
| 1          | -2.194878 | -5.47752  | 0.2893    | 1           | -2.554435 | -5.113947 | -0.848916 |
| 6          | -2.511451 | -3.727951 | -0.890623 | 6           | -2.601783 | -3.162075 | -1.707608 |
| 6          | -3.252531 | -3.510011 | -2.067401 | 6           | -3.248869 | -2.670179 | -2.856719 |
| 1          | -3.327185 | -4.345701 | -2.752008 | 1           | -3.362135 | -3.364228 | -3.680082 |
| 6          | -3.961406 | -2.353132 | -2.418737 | 6           | -3.836768 | -1.408651 | -3.021615 |
| 6          | -4.767341 | -2.36348  | -3.69149  | 6           | -4.573518 | -1.118571 | -4.302516 |
| 1          | -5.818369 | -2.185134 | -3.447767 | 1           | -5.614843 | -0.881633 | -4.067364 |
| 1          | -4.67856  | -3.301091 | -4.241012 | 1           | -4.543336 | -1.950352 | -5.006902 |
| 1          | -4.445036 | -1.53349  | -4.326439 | 1           | -4.143992 | -0.227095 | -4.768132 |
| 6          | 0.924454  | -1.75015  | -3.3258   | 6           | 1.153924  | -1.178212 | -3.577313 |
| 6          | -0.397924 | -1.535633 | -2.947921 | 6           | -0.162309 | -0.88772  | -3.230067 |
| 1          | -1.214609 | -1.730963 | -3.636775 | 1           | -0.949722 | -0.880949 | -3.977987 |
| 6          | 0.273401  | -0.847938 | -0.873081 | 6           | 0.443221  | -0.619556 | -1.041106 |
| 6          | 0.024688  | -0.307725 | 0.431767  | 6           | 0.16372   | -0.281234 | 0.32368   |
| 6          | -1.282354 | -0.047563 | 0.905891  | 6           | -1.143459 | 0.024416  | 0.770576  |
| 6          | -1.391139 | 0.621     | 2.123595  | 6           | -1.272002 | 0.482423  | 2.080189  |
| 1          | -2.378463 | 0.899251  | 2.477214  | 1           | -2.251905 | 0.792374  | 2.427891  |
| 6          | -0.266393 | 0.945805  | 2.902115  | 6           | -0.176053 | 0.552634  | 2.958388  |
| 6          | -0.474445 | 1.67085   | 4.233074  | 6           | -0.407956 | 1.04514   | 4.388278  |

|    |           |           |           |    |           |           |           |
|----|-----------|-----------|-----------|----|-----------|-----------|-----------|
| 6  | -1.149895 | 3.025457  | 3.966831  | 6  | -0.974115 | 2.473151  | 4.345043  |
| 1  | -1.309901 | 3.559047  | 4.910165  | 1  | -1.1532   | 2.838976  | 5.361925  |
| 1  | -0.524359 | 3.649512  | 3.321832  | 1  | -0.271298 | 3.153581  | 3.855308  |
| 6  | -1.374005 | 0.821567  | 5.143791  | 6  | -1.413284 | 0.117043  | 5.087088  |
| 1  | -0.917333 | -0.152697 | 5.342539  | 1  | -1.031987 | -0.907666 | 5.129196  |
| 1  | -2.355137 | 0.646515  | 4.695736  | 1  | -2.374012 | 0.095214  | 4.566629  |
| 1  | -1.527783 | 1.330164  | 6.101616  | 1  | -1.593432 | 0.458427  | 6.112163  |
| 6  | -5.286173 | -2.261711 | 1.66953   | 6  | -5.335933 | -1.874082 | 1.00426   |
| 1  | -4.636799 | -3.129115 | 1.592908  | 1  | -4.773421 | -2.786366 | 0.829774  |
| 6  | -6.514983 | -2.295539 | 2.301649  | 6  | -6.59747  | -1.871791 | 1.570223  |
| 1  | -6.895985 | -3.19898  | 2.759892  | 6  | -7.219772 | -0.63484  | 1.73138   |
| 6  | -7.232874 | -1.1021   | 2.309246  | 1  | -8.216523 | -0.575042 | 2.161947  |
| 1  | -8.212816 | -1.048501 | 2.779096  | 6  | -5.415999 | 0.436053  | 0.845207  |
| 6  | -5.586484 | -0.019883 | 1.177133  | 6  | -4.694106 | 1.632103  | 0.460093  |
| 6  | -4.996827 | 1.161042  | 0.575546  | 6  | -3.389775 | 1.474071  | -0.068376 |
| 6  | -3.709175 | 1.031676  | 0.001473  | 6  | -2.700756 | 2.639125  | -0.403685 |
| 6  | -3.151982 | 2.178981  | -0.561955 | 1  | -1.692046 | 2.539138  | -0.791518 |
| 1  | -2.159711 | 2.103087  | -0.99487  | 6  | -3.245411 | 3.917576  | -0.246033 |
| 6  | -3.808206 | 3.414074  | -0.57754  | 6  | -4.544467 | 4.028199  | 0.267747  |
| 6  | -5.082965 | 3.497498  | -0.002223 | 1  | -5.00116  | 5.001017  | 0.40069   |
| 1  | -5.62212  | 4.436579  | 0.004443  | 6  | -5.260076 | 2.899389  | 0.618661  |
| 6  | -5.670695 | 2.383995  | 0.568672  | 1  | -6.264456 | 2.978714  | 1.021344  |
| 1  | -6.657343 | 2.440733  | 1.016575  | 6  | -1.168894 | 5.18428   | 0.301734  |
| 6  | -1.81305  | 4.907681  | -0.429865 | 1  | -1.464255 | 5.25882   | 1.352621  |
| 1  | -2.025593 | 5.131504  | 0.619854  | 1  | -0.548763 | 6.053766  | 0.057878  |
| 1  | -1.296332 | 5.76993   | -0.865365 | 1  | -0.555297 | 4.287076  | 0.190875  |
| 1  | -1.130795 | 4.054705  | -0.456849 | 6  | -3.176237 | 6.452706  | -0.433334 |
| 6  | -3.978208 | 5.885081  | -1.155999 | 1  | -3.483757 | 6.60805   | 0.605145  |
| 1  | -4.219291 | 6.176487  | -0.129319 | 1  | -4.068653 | 6.487812  | -1.065855 |
| 1  | -4.914977 | 5.754511  | -1.706366 | 1  | -2.535262 | 7.293179  | -0.716192 |
| 1  | -3.43609  | 6.716562  | -1.616348 | 6  | -2.405628 | 5.142627  | -0.609539 |
| 6  | -3.112124 | 4.624951  | -1.200464 | 6  | -1.959058 | 5.046003  | -2.076085 |
| 6  | -2.780916 | 4.324217  | -2.670163 | 1  | -1.357381 | 5.920929  | -2.34443  |
| 1  | -2.275435 | 5.182409  | -3.125964 | 1  | -2.824187 | 5.006833  | -2.74474  |
| 1  | -3.692392 | 4.120715  | -3.240263 | 1  | -1.353113 | 4.155503  | -2.258768 |
| 1  | -2.123757 | 3.456919  | -2.768924 | 77 | 2.984978  | -0.857797 | 0.311687  |
| 77 | 2.887377  | -0.613613 | 0.335286  | 7  | 5.711188  | 0.711481  | 3.081616  |
| 7  | 5.560821  | 1.659545  | 2.627621  | 7  | 4.161693  | -0.700609 | 1.973866  |
| 7  | 4.118637  | -0.062816 | 1.868936  | 7  | 1.750839  | -0.895997 | -1.316813 |
| 7  | 1.589102  | -1.042885 | -1.180733 | 8  | 2.451517  | -2.930916 | 0.708161  |
| 8  | 2.59584   | -2.624952 | 1.119172  | 8  | 4.691005  | -1.654395 | -0.783639 |
| 8  | 4.604646  | -1.431122 | -0.729092 | 6  | 2.413516  | -5.266398 | 0.646967  |
| 6  | 2.81083   | -4.923857 | 1.477091  | 1  | 1.386692  | -5.279132 | 0.270768  |
| 1  | 1.774806  | -5.108574 | 1.179532  | 1  | 2.95444   | -6.128733 | 0.256281  |

|   |           |           |           |   |           |           |           |
|---|-----------|-----------|-----------|---|-----------|-----------|-----------|
| 1 | 3.424368  | -5.785367 | 1.211895  | 1 | 2.350633  | -5.341284 | 1.736402  |
| 1 | 2.80928   | -4.801114 | 2.564036  | 6 | 3.054338  | -3.954009 | 0.273558  |
| 6 | 3.284173  | -3.645933 | 0.832208  | 6 | 4.233126  | -3.980441 | -0.488476 |
| 6 | 4.418898  | -3.69636  | 0.007138  | 1 | 4.618515  | -4.958604 | -0.747115 |
| 1 | 4.894414  | -4.663052 | -0.100651 | 6 | 4.973192  | -2.876646 | -0.943247 |
| 6 | 5.009149  | -2.628356 | -0.688399 | 6 | 6.241583  | -3.134762 | -1.715036 |
| 6 | 6.254636  | -2.899826 | -1.492599 | 1 | 7.083107  | -2.699432 | -1.168534 |
| 1 | 7.068256  | -2.280129 | -1.105051 | 1 | 6.429144  | -4.196338 | -1.878468 |
| 1 | 6.555686  | -3.947494 | -1.466826 | 1 | 6.190108  | -2.62113  | -2.679005 |
| 1 | 6.089936  | -2.594079 | -2.529562 | 6 | 2.103661  | -1.17013  | -2.570584 |
| 6 | 1.912336  | -1.483597 | -2.394274 | 1 | 3.153332  | -1.374805 | -2.748799 |
| 1 | 2.969164  | -1.608603 | -2.601785 | 6 | 1.292524  | -0.228583 | 1.168675  |
| 6 | 1.182031  | -0.003778 | 1.181423  | 6 | 1.086012  | 0.192334  | 2.487753  |
| 6 | 1.00106   | 0.621778  | 2.419467  | 1 | 1.93777   | 0.257556  | 3.153292  |
| 1 | 1.874324  | 0.878624  | 3.006169  | 1 | -1.919227 | 2.519642  | 3.798792  |
| 1 | -2.119585 | 2.906858  | 3.477156  | 6 | 0.877253  | 1.066886  | 5.217625  |
| 6 | 0.840433  | 1.929702  | 4.971168  | 1 | 1.318549  | 0.069608  | 5.308408  |
| 1 | 1.363048  | 0.997397  | 5.206341  | 1 | 1.626814  | 1.738328  | 4.788565  |
| 1 | 1.514627  | 2.565893  | 4.390267  | 1 | 0.651754  | 1.423581  | 6.227194  |
| 1 | 0.632962  | 2.442283  | 5.915522  | 6 | 4.304059  | -1.627495 | 2.922643  |
| 6 | 4.396446  | -0.793144 | 2.949956  | 1 | 3.706605  | -2.523815 | 2.797448  |
| 1 | 3.887313  | -1.748464 | 3.013637  | 6 | 5.160646  | -1.426274 | 3.98832   |
| 6 | 5.273925  | -0.330926 | 3.91245   | 1 | 5.280036  | -2.174398 | 4.760964  |
| 1 | 5.502804  | -0.918966 | 4.79151   | 6 | 5.853554  | -0.220758 | 4.012238  |
| 6 | 5.840023  | 0.919785  | 3.690763  | 1 | 6.55034   | 0.005754  | 4.816032  |
| 1 | 6.545113  | 1.34628   | 4.400634  | 6 | 4.866882  | 0.462402  | 2.082466  |
| 6 | 4.70298   | 1.163269  | 1.738214  | 6 | 4.602836  | 1.41474   | 1.028306  |
| 6 | 4.293407  | 1.890545  | 0.55857   | 6 | 3.657018  | 1.007374  | 0.059292  |
| 6 | 3.35138   | 1.234849  | -0.267648 | 6 | 3.366658  | 1.914722  | -0.958446 |
| 6 | 2.924264  | 1.921512  | -1.403193 | 1 | 2.636182  | 1.63851   | -1.712706 |
| 1 | 2.195002  | 1.450582  | -2.05499  | 6 | 3.98125   | 3.168934  | -1.048656 |
| 6 | 3.402189  | 3.192723  | -1.740974 | 6 | 4.915222  | 3.528711  | -0.067898 |
| 6 | 4.336723  | 3.803194  | -0.893733 | 1 | 5.406787  | 4.492532  | -0.107578 |
| 1 | 4.724211  | 4.787447  | -1.124557 | 6 | 5.222681  | 2.661361  | 0.964965  |
| 6 | 4.777937  | 3.160005  | 0.248696  | 1 | 5.943222  | 2.93305   | 1.729643  |
| 1 | 5.500649  | 3.626072  | 0.910707  | 6 | 2.118702  | 4.402718  | -2.176933 |
| 6 | 1.37582   | 4.015367  | -2.961698 | 1 | 1.840001  | 4.891501  | -1.238986 |
| 1 | 1.075922  | 4.628306  | -2.10695  | 1 | 1.848585  | 5.06841   | -3.003717 |
| 1 | 1.007314  | 4.496524  | -3.874096 | 1 | 1.519164  | 3.493592  | -2.269139 |
| 1 | 0.876177  | 3.047713  | -2.869048 | 6 | 4.379267  | 5.42763   | -2.150101 |
| 6 | 3.509102  | 5.256335  | -3.225601 | 1 | 4.150863  | 5.9848    | -1.236519 |
| 1 | 3.255428  | 5.934831  | -2.405572 | 1 | 5.462438  | 5.28233   | -2.20308  |
| 1 | 4.598803  | 5.215668  | -3.314929 | 1 | 4.087543  | 6.051644  | -3.000202 |
| 1 | 3.117602  | 5.692197  | -4.149675 | 6 | 3.623654  | 4.098558  | -2.210191 |



|    |          |           |           |    |           |           |           |
|----|----------|-----------|-----------|----|-----------|-----------|-----------|
| 6  | 2.903302 | 3.866633  | -3.021011 | 6  | 3.976037  | 3.408885  | -3.537309 |
| 6  | 3.284302 | 2.996862  | -4.229349 | 1  | 3.730736  | 4.063537  | -4.380405 |
| 1  | 2.938383 | 3.465633  | -5.156901 | 1  | 5.044074  | 3.176656  | -3.583325 |
| 1  | 4.369451 | 2.872688  | -4.292143 | 1  | 3.424603  | 2.47407   | -3.666189 |
| 1  | 2.836575 | 2.001688  | -4.168289 | 17 | 1.597308  | -1.533189 | -5.208581 |
| 17 | 1.328811 | -2.322821 | -4.904904 | 17 | -7.371886 | -3.338613 | 2.050476  |

| Ir6-Cl-3MC |           |           | Ir6-2Cl-3MC |    |           |           |           |
|------------|-----------|-----------|-------------|----|-----------|-----------|-----------|
| 77         | -2.830811 | -0.793374 | -0.139451   | 77 | -2.718014 | -0.466312 | -0.384919 |
| 7          | -6.272531 | -0.433519 | 2.50041     | 7  | -6.109135 | -0.398905 | 2.485279  |
| 7          | -4.470461 | -1.388957 | 1.302614    | 7  | -4.340435 | -1.298008 | 1.18516   |
| 7          | -0.644304 | -0.483809 | -2.057888   | 7  | -0.611284 | 0.321123  | -1.999391 |
| 8          | -2.186706 | -2.794163 | -0.620641   | 8  | -2.069973 | -2.244417 | -1.408604 |
| 8          | -4.267481 | -1.000976 | -1.704065   | 8  | -4.354246 | -0.497807 | -1.757782 |
| 6          | -1.836106 | -4.785696 | -1.796782   | 6  | -1.753746 | -3.895142 | -3.032647 |
| 1          | -0.76666  | -4.601467 | -1.937041   | 1  | -0.694365 | -3.641931 | -3.130086 |
| 1          | -2.214773 | -5.364126 | -2.639897   | 1  | -2.135843 | -4.239738 | -3.99405  |
| 1          | -1.941999 | -5.367729 | -0.877375   | 1  | -1.82466  | -4.707379 | -2.303435 |
| 6          | -2.539537 | -3.463895 | -1.632059   | 6  | -2.499191 | -2.698213 | -2.504297 |
| 6          | -3.509044 | -3.093658 | -2.578444   | 6  | -3.593505 | -2.2042   | -3.233834 |
| 1          | -3.687461 | -3.788803 | -3.388988   | 1  | -3.832216 | -2.703985 | -4.163851 |
| 6          | -4.29989  | -1.937874 | -2.560796   | 6  | -4.448321 | -1.174165 | -2.827452 |
| 6          | -5.322166 | -1.745538 | -3.647457   | 6  | -5.620256 | -0.810862 | -3.697188 |
| 1          | -6.30584  | -1.600785 | -3.192986   | 1  | -6.542502 | -0.919178 | -3.11986  |
| 1          | -5.360899 | -2.583554 | -4.343923   | 1  | -5.682003 | -1.421259 | -4.598678 |
| 1          | -5.085493 | -0.828266 | -4.19439    | 1  | -5.540126 | 0.243679  | -3.976219 |
| 6          | 0.973168  | -0.736344 | -3.791727   | 6  | 0.953306  | 0.60453   | -3.772082 |
| 1          | 1.206313  | -0.809297 | -4.844192   | 1  | 1.160775  | 0.869581  | -4.79887  |
| 6          | -0.329414 | -0.576738 | -3.323794   | 6  | -0.334308 | 0.63075   | -3.239851 |
| 6          | 0.34602   | -0.529619 | -1.158541   | 6  | 0.396178  | -0.045034 | -1.198177 |
| 6          | 0.122468  | -0.353986 | 0.249083    | 6  | 0.19644   | -0.353678 | 0.188713  |
| 6          | -1.169803 | -0.218531 | 0.815935    | 6  | -1.095027 | -0.402709 | 0.776443  |
| 6          | -1.232703 | 0.11882   | 2.168145    | 6  | -1.137695 | -0.577571 | 2.161564  |
| 1          | -2.208375 | 0.297215  | 2.608208    | 1  | -2.109094 | -0.592903 | 2.64456   |
| 6          | -0.085694 | 0.222632  | 2.973918    | 6  | 0.017717  | -0.75042  | 2.939716  |
| 6          | -0.249416 | 0.573113  | 4.453648    | 6  | -0.124236 | -0.934363 | 4.451671  |
| 6          | -0.941252 | 1.939986  | 4.575125    | 6  | -0.815979 | 0.302317  | 5.046094  |
| 1          | -1.073177 | 2.20291   | 5.630346    | 1  | -0.934267 | 0.184523  | 6.128677  |
| 1          | -0.341295 | 2.721617  | 4.100002    | 1  | -0.224143 | 1.203764  | 4.862604  |
| 6          | -1.112941 | -0.498867 | 5.136201    | 6  | -0.975837 | -2.181833 | 4.733567  |
| 1          | -0.643072 | -1.48401  | 5.058853    | 1  | -0.506419 | -3.076703 | 4.314259  |
| 1          | -2.106526 | -0.564855 | 4.686137    | 1  | -1.975981 | -2.096581 | 4.301412  |
| 1          | -1.239668 | -0.261626 | 6.198009    | 1  | -1.087034 | -2.326097 | 5.813724  |
| 6          | -4.774524 | -2.596248 | 1.766672    | 6  | -4.713113 | -2.514214 | 1.524051  |
| 1          | -4.137017 | -3.410383 | 1.433132    | 6  | -5.799455 | -2.763369 | 2.349087  |
| 6          | -5.844151 | -2.782879 | 2.622637    | 1  | -6.095492 | -3.767551 | 2.618653  |
| 1          | -6.102181 | -3.760377 | 3.009219    | 6  | -6.467426 | -1.63395  | 2.801388  |
| 6          | -6.569277 | -1.641007 | 2.954185    | 1  | -7.332565 | -1.734125 | 3.453177  |
| 1          | -7.429464 | -1.704395 | 3.617575    | 6  | -5.051735 | -0.257862 | 1.680867  |
| 6          | -5.220214 | -0.328829 | 1.680765    | 6  | -4.597043 | 1.072311  | 1.303384  |

|    |           |           |           |    |           |           |           |
|----|-----------|-----------|-----------|----|-----------|-----------|-----------|
| 6  | -4.80242  | 0.955537  | 1.148263  | 6  | -3.496997 | 1.195215  | 0.425157  |
| 6  | -3.666802 | 0.981572  | 0.304618  | 6  | -3.092001 | 2.487845  | 0.086012  |
| 6  | -3.275479 | 2.224104  | -0.192192 | 1  | -2.247835 | 2.591862  | -0.589194 |
| 1  | -2.400144 | 2.262348  | -0.833093 | 6  | -3.723186 | 3.636369  | 0.573818  |
| 6  | -3.953969 | 3.409683  | 0.10694   | 6  | -4.810474 | 3.469753  | 1.439436  |
| 6  | -5.075988 | 3.339826  | 0.943124  | 1  | -5.330823 | 4.331955  | 1.838302  |
| 1  | -5.628134 | 4.236454  | 1.196058  | 6  | -5.242723 | 2.205263  | 1.799538  |
| 6  | -5.495538 | 2.127584  | 1.458605  | 1  | -6.088265 | 2.076331  | 2.466398  |
| 1  | -6.364325 | 2.066504  | 2.105689  | 6  | -1.772211 | 5.184082  | 0.682416  |
| 6  | -2.028216 | 4.994886  | 0.06236   | 1  | -1.742364 | 5.115225  | 1.773908  |
| 1  | -2.031496 | 5.07336   | 1.153705  | 1  | -1.374729 | 6.161914  | 0.389572  |
| 1  | -1.636663 | 5.932347  | -0.347696 | 1  | -1.107152 | 4.415118  | 0.282957  |
| 1  | -1.339518 | 4.192027  | -0.211017 | 6  | -4.06046  | 6.151492  | 0.731894  |
| 6  | -4.330075 | 5.918427  | -0.080667 | 1  | -4.059423 | 6.153201  | 1.825985  |
| 1  | -4.362202 | 6.063908  | 1.003338  | 1  | -5.097638 | 6.09156   | 0.388025  |
| 1  | -5.355503 | 5.796579  | -0.442686 | 1  | -3.655493 | 7.112509  | 0.40077   |
| 1  | -3.927552 | 6.834082  | -0.52442  | 6  | -3.20782  | 5.015773  | 0.163297  |
| 6  | -3.445589 | 4.73201   | -0.468831 | 6  | -3.215455 | 5.133627  | -1.368296 |
| 6  | -3.409916 | 4.643426  | -2.002077 | 1  | -2.840251 | 6.116834  | -1.671651 |
| 1  | -3.045156 | 5.58525   | -2.426012 | 1  | -4.229401 | 5.01751   | -1.762355 |
| 1  | -4.409338 | 4.451764  | -2.403835 | 1  | -2.585934 | 4.374283  | -1.838292 |
| 1  | -2.752693 | 3.842009  | -2.347858 | 77 | 3.034983  | -0.670392 | -0.201955 |
| 77 | 2.981271  | -0.676808 | 0.026061  | 7  | 5.915854  | -0.274527 | 2.817073  |
| 7  | 5.78559   | 0.870295  | 2.73134   | 7  | 4.322459  | -1.166044 | 1.304268  |
| 7  | 4.258136  | -0.562533 | 1.618716  | 7  | 1.688634  | -0.088869 | -1.627343 |
| 7  | 1.652823  | -0.67054  | -1.523175 | 8  | 2.587545  | -2.744651 | -0.689823 |
| 8  | 2.650512  | -2.815936 | 0.259315  | 8  | 4.689078  | -0.837801 | -1.610359 |
| 8  | 4.683058  | -1.219016 | -1.223821 | 6  | 2.621807  | -4.84082  | -1.721081 |
| 6  | 2.81027   | -5.131496 | -0.00886  | 1  | 1.555237  | -4.763159 | -1.947876 |
| 1  | 1.760029  | -5.199526 | -0.305667 | 1  | 3.123618  | -5.407909 | -2.505682 |
| 1  | 3.385236  | -5.903348 | -0.521395 | 1  | 2.704364  | -5.385593 | -0.775744 |
| 1  | 2.845615  | -5.311565 | 1.069619  | 6  | 3.188041  | -3.454719 | -1.546147 |
| 6  | 3.310675  | -3.738846 | -0.297388 | 6  | 4.309028  | -3.09095  | -2.310121 |
| 6  | 4.439551  | -3.593385 | -1.119936 | 1  | 4.702241  | -3.84692  | -2.978103 |
| 1  | 4.890346  | -4.50723  | -1.48601  | 6  | 4.98953   | -1.862614 | -2.28748  |
| 6  | 5.057111  | -2.39299  | -1.50715  | 6  | 6.213395  | -1.707824 | -3.153766 |
| 6  | 6.299245  | -2.470232 | -2.35778  | 1  | 7.0811    | -1.530778 | -2.511591 |
| 1  | 7.134154  | -2.029537 | -1.805247 | 1  | 6.402769  | -2.580599 | -3.77936  |
| 1  | 6.555972  | -3.49141  | -2.641143 | 1  | 6.101426  | -0.822336 | -3.785255 |
| 1  | 6.160811  | -1.86486  | -3.257677 | 6  | 1.953004  | 0.231568  | -2.894877 |
| 6  | 1.951466  | -0.774775 | -2.818602 | 1  | 2.997228  | 0.186902  | -3.184318 |
| 1  | 3.005495  | -0.876538 | -3.052538 | 6  | 1.38475   | -0.566937 | 0.916724  |
| 6  | 1.301554  | -0.27277  | 1.02313   | 6  | 1.258446  | -0.751239 | 2.301111  |
| 6  | 1.160974  | 0.018853  | 2.38651   | 1  | 2.15658   | -0.891926 | 2.889634  |

|    |           |           |           |    |           |           |           |
|----|-----------|-----------|-----------|----|-----------|-----------|-----------|
| 1  | 2.054317  | 0.105738  | 2.992663  | 1  | -1.806996 | 0.460573  | 4.61385   |
| 1  | -1.925927 | 1.94095   | 4.101671  | 6  | 1.224636  | -1.109119 | 5.151387  |
| 6  | 1.089036  | 0.647225  | 5.190273  | 1  | 1.755754  | -1.996529 | 4.793579  |
| 1  | 1.620606  | -0.308882 | 5.161267  | 1  | 1.87195   | -0.238879 | 5.008163  |
| 1  | 1.742177  | 1.417837  | 4.770378  | 1  | 1.064184  | -1.230015 | 6.227003  |
| 1  | 0.912938  | 0.898107  | 6.240752  | 6  | 4.550876  | -2.39708  | 1.764376  |
| 6  | 4.53631   | -1.548139 | 2.47337   | 1  | 3.965425  | -3.186195 | 1.305446  |
| 1  | 3.99658   | -2.475255 | 2.314358  | 6  | 5.475781  | -2.619604 | 2.766967  |
| 6  | 5.454044  | -1.367681 | 3.490918  | 1  | 5.665135  | -3.615907 | 3.144389  |
| 1  | 5.682913  | -2.163277 | 4.187743  | 6  | 6.142879  | -1.502823 | 3.258817  |
| 6  | 6.061848  | -0.119246 | 3.567804  | 1  | 6.889245  | -1.600383 | 4.043912  |
| 1  | 6.800284  | 0.094638  | 4.337193  | 6  | 5.009114  | -0.122879 | 1.853674  |
| 6  | 4.886951  | 0.638415  | 1.776215  | 6  | 4.653064  | 1.168998  | 1.312734  |
| 6  | 4.474437  | 1.650853  | 0.830821  | 6  | 3.647283  | 1.159103  | 0.318523  |
| 6  | 3.483464  | 1.253203  | -0.096261 | 6  | 3.273903  | 2.393097  | -0.211628 |
| 6  | 3.038212  | 2.220405  | -0.995999 | 1  | 2.496432  | 2.421215  | -0.969129 |
| 1  | 2.265635  | 1.953974  | -1.710616 | 6  | 3.866364  | 3.596509  | 0.188454  |
| 6  | 3.54909   | 3.522988  | -1.017432 | 6  | 4.860423  | 3.557839  | 1.175421  |
| 6  | 4.538849  | 3.869441  | -0.088144 | 1  | 5.33645   | 4.471137  | 1.509657  |
| 1  | 4.954704  | 4.869052  | -0.078466 | 6  | 5.249394  | 2.354959  | 1.737071  |
| 6  | 4.995857  | 2.943517  | 0.832782  | 1  | 6.017793  | 2.316104  | 2.502457  |
| 1  | 5.757267  | 3.205395  | 1.560408  | 6  | 1.916606  | 5.105259  | -0.240397 |
| 6  | 1.504738  | 4.711081  | -1.830001 | 1  | 1.68497   | 5.153558  | 0.827472  |
| 1  | 1.301537  | 5.104546  | -0.829888 | 1  | 1.583841  | 6.039154  | -0.705934 |
| 1  | 1.102361  | 5.417302  | -2.564226 | 1  | 1.331108  | 4.289486  | -0.671076 |
| 1  | 0.958353  | 3.770275  | -1.933744 | 6  | 4.154663  | 6.123035  | 0.099831  |
| 6  | 3.688431  | 5.888977  | -1.944198 | 1  | 3.97191   | 6.243541  | 1.171827  |
| 1  | 3.524501  | 6.351047  | -0.966103 | 1  | 5.234985  | 6.059215  | -0.060935 |
| 1  | 4.766722  | 5.824365  | -2.11841  | 1  | 3.798947  | 7.028649  | -0.400697 |
| 1  | 3.270119  | 6.559497  | -2.70091  | 6  | 3.421907  | 4.905629  | -0.46685  |
| 6  | 3.013254  | 4.519837  | -2.047015 | 6  | 3.705052  | 4.836302  | -1.975568 |
| 6  | 3.259942  | 3.972481  | -3.461458 | 1  | 3.391201  | 5.766065  | -2.462113 |
| 1  | 2.883307  | 4.677338  | -4.2104   | 1  | 4.77303   | 4.693384  | -2.165009 |
| 1  | 4.328871  | 3.822129  | -3.639584 | 1  | 3.167311  | 4.01072   | -2.448735 |
| 1  | 2.756378  | 3.015231  | -3.618807 | 17 | -1.65766  | 1.120247  | -4.246161 |
| 17 | -1.620431 | -0.460832 | -4.477071 | 17 | -3.783679 | -3.837858 | 0.916483  |
|    | Ir-Cl-T1  |           |           |    | Ir-2Cl-T1 |           |           |
| 77 | -2.537309 | -0.876497 | -0.031149 | 77 | 2.771724  | 0.755623  | 0.211759  |
| 77 | 2.686928  | 0.899702  | -0.184643 | 77 | -2.502142 | -0.652917 | -0.615125 |
| 7  | -5.728808 | -0.668384 | 2.67878   | 7  | 5.686627  | 0.030134  | 3.134964  |
| 7  | -3.85069  | -1.417271 | 1.445983  | 7  | 3.971654  | 1.034429  | 1.848803  |
| 7  | -1.135776 | -0.237562 | -1.471122 | 7  | 1.479131  | 0.382701  | -1.412558 |
| 7  | 1.188498  | 0.322007  | -1.505919 | 7  | -0.856465 | -0.024409 | -1.716053 |
| 7  | 4.103307  | 1.371156  | 1.210365  | 7  | -4.074091 | -1.183113 | 0.577091  |

|   |           |           |           |   |           |           |           |
|---|-----------|-----------|-----------|---|-----------|-----------|-----------|
| 7 | 5.973811  | 0.513561  | 2.39152   | 7 | -5.984103 | -0.339961 | 1.698338  |
| 8 | -4.022315 | -1.612913 | -1.40476  | 8 | 4.413385  | 1.555311  | -0.924801 |
| 8 | -1.731071 | -2.871525 | -0.21667  | 8 | 2.102327  | 2.810448  | 0.211906  |
| 8 | 1.895979  | 2.928631  | -0.282566 | 8 | -1.82342  | -2.709344 | -0.868211 |
| 8 | 4.029351  | 1.4933    | -1.768084 | 8 | -3.709607 | -0.970974 | -2.375874 |
| 6 | -5.048615 | -2.73062  | -3.181736 | 6 | 5.655837  | 2.799983  | -2.464029 |
| 1 | -6.013937 | -2.569485 | -2.696159 | 1 | 6.562219  | 2.524918  | -1.919628 |
| 1 | -5.048493 | -3.690391 | -3.699063 | 1 | 5.753685  | 3.810397  | -2.861853 |
| 1 | -4.913191 | -1.927678 | -3.912565 | 1 | 5.547498  | 2.095314  | -3.293913 |
| 6 | -3.953335 | -2.624013 | -2.159236 | 6 | 4.466754  | 2.647086  | -1.559363 |
| 6 | -2.973003 | -3.626604 | -2.100537 | 6 | 3.538874  | 3.695246  | -1.465007 |
| 1 | -3.051161 | -4.439262 | -2.810895 | 1 | 3.722983  | 4.576568  | -2.065287 |
| 6 | -1.975011 | -3.722266 | -1.12724  | 6 | 2.468639  | 3.743542  | -0.568086 |
| 6 | -1.12432  | -4.961501 | -1.075955 | 6 | 1.687672  | 5.021201  | -0.431796 |
| 1 | -0.077671 | -4.678369 | -0.948906 | 1 | 0.619589  | 4.795366  | -0.427157 |
| 1 | -1.236199 | -5.578126 | -1.96817  | 1 | 1.912798  | 5.732308  | -1.227064 |
| 1 | -1.406821 | -5.555151 | -0.200214 | 1 | 1.923528  | 5.484795  | 0.531793  |
| 6 | -3.89004  | -2.599678 | 2.060072  | 6 | 4.017435  | 2.133713  | 2.601072  |
| 1 | -3.127647 | -3.31139  | 1.760981  | 1 | 3.323536  | 2.920784  | 2.325164  |
| 6 | -4.854832 | -2.865332 | 3.013884  | 6 | 4.904705  | 2.22585   | 3.656915  |
| 1 | -4.89576  | -3.82135  | 3.519034  | 1 | 4.950905  | 3.112627  | 4.275206  |
| 6 | -5.763484 | -1.847359 | 3.283557  | 6 | 5.728923  | 1.127302  | 3.877811  |
| 1 | -6.552853 | -1.986059 | 4.018572  | 1 | 6.454068  | 1.129706  | 4.688114  |
| 6 | -4.774248 | -0.471842 | 1.772682  | 6 | 4.809467  | 0.000819  | 2.13512   |
| 6 | -4.618973 | 0.777368  | 1.060321  | 6 | 4.650636  | -1.145206 | 1.266362  |
| 6 | -5.454836 | 1.876741  | 1.255618  | 6 | 5.401119  | -2.313174 | 1.395903  |
| 1 | -6.272517 | 1.804862  | 1.965015  | 1 | 6.154922  | -2.378847 | 2.173369  |
| 6 | -5.226433 | 3.034315  | 0.537695  | 6 | 5.170589  | -3.363774 | 0.528784  |
| 1 | -5.882477 | 3.884646  | 0.690719  | 1 | 5.760754  | -4.268057 | 0.633817  |
| 6 | -4.168529 | 3.127769  | -0.385043 | 6 | 4.194258  | -3.281739 | -0.480818 |
| 6 | -3.344584 | 2.018053  | -0.564313 | 6 | 3.456688  | -2.104793 | -0.594149 |
| 1 | -2.526002 | 2.059477  | -1.269973 | 1 | 2.703648  | -2.00893  | -1.364329 |
| 6 | -3.547555 | 0.832177  | 0.1451    | 6 | 3.664399  | -1.024022 | 0.265406  |
| 6 | -3.96565  | 4.428188  | -1.161396 | 6 | 3.981221  | -4.471356 | -1.415512 |
| 6 | -2.773553 | 4.353119  | -2.116489 | 6 | 2.887396  | -4.204875 | -2.45084  |
| 1 | -1.83889  | 4.163561  | -1.580232 | 1 | 1.921553  | -4.008686 | -1.97575  |
| 1 | -2.669121 | 5.306319  | -2.64352  | 1 | 2.771858  | -5.08357  | -3.092432 |
| 1 | -2.899669 | 3.568363  | -2.868027 | 1 | 3.131004  | -3.352758 | -3.091907 |
| 6 | -3.721767 | 5.577449  | -0.171665 | 6 | 3.576818  | -5.699871 | -0.586295 |
| 1 | -2.828925 | 5.388093  | 0.431383  | 1 | 2.645356  | -5.513827 | -0.043641 |
| 1 | -4.564934 | 5.715628  | 0.510635  | 1 | 4.343704  | -5.969142 | 0.144969  |
| 1 | -3.574769 | 6.516486  | -0.71536  | 1 | 3.423815  | -6.562222 | -1.243474 |
| 6 | -5.227109 | 4.721678  | -1.988439 | 6 | 5.291102  | -4.766047 | -2.163031 |
| 1 | -5.097971 | 5.650583  | -2.553716 | 1 | 5.154997  | -5.618149 | -2.837    |

|   |           |           |           |   |           |           |           |
|---|-----------|-----------|-----------|---|-----------|-----------|-----------|
| 1 | -6.112192 | 4.835095  | -1.356738 | 1 | 6.106399  | -5.010179 | -1.476875 |
| 1 | -5.421634 | 3.91353   | -2.699243 | 1 | 5.600101  | -3.90371  | -2.760568 |
| 6 | 1.199709  | 0.235943  | -2.887957 | 6 | -0.733822 | 0.219936  | -3.073187 |
| 1 | 2.158446  | 0.37169   | -3.369997 | 1 | -1.649785 | 0.19749   | -3.64833  |
| 6 | 0.0439    | -0.025829 | -3.562063 | 6 | 0.490856  | 0.487665  | -3.607517 |
| 1 | 0.033517  | -0.047097 | -4.645165 | 1 | 0.603226  | 0.633247  | -4.675142 |
| 6 | -1.159735 | -0.270269 | -2.862915 | 6 | 1.635843  | 0.576483  | -2.782097 |
| 6 | 0.034505  | 0.055856  | -0.895969 | 6 | 0.246746  | 0.097949  | -0.979656 |
| 6 | 0.075236  | 0.044352  | 0.534353  | 6 | 0.072017  | -0.053263 | 0.432698  |
| 6 | 1.286222  | 0.372323  | 1.13654   | 6 | -1.205197 | -0.375026 | 0.883189  |
| 6 | 1.283706  | 0.322741  | 2.548481  | 6 | -1.329067 | -0.492498 | 2.282936  |
| 1 | 2.198986  | 0.558115  | 3.079231  | 1 | -2.299517 | -0.731782 | 2.702212  |
| 6 | 0.139446  | -0.019983 | 3.291211  | 6 | -0.241843 | -0.309614 | 3.158944  |
| 6 | -1.039959 | -0.342034 | 2.612196  | 6 | 1.010091  | 0.018414  | 2.631308  |
| 1 | -1.921335 | -0.618416 | 3.181606  | 1 | 1.846735  | 0.173233  | 3.304572  |
| 6 | -1.098912 | -0.327496 | 1.202446  | 6 | 1.197056  | 0.164114  | 1.242555  |
| 6 | 0.147427  | -0.054961 | 4.823266  | 6 | -0.392489 | -0.453052 | 4.677462  |
| 6 | -0.88654  | 0.947592  | 5.358155  | 6 | 0.546491  | -1.562058 | 5.176284  |
| 1 | -1.896732 | 0.71468   | 5.011246  | 1 | 1.593467  | -1.339309 | 4.954305  |
| 1 | -0.648544 | 1.963951  | 5.030953  | 1 | 0.303022  | -2.518975 | 4.705565  |
| 1 | -0.895806 | 0.933573  | 6.453266  | 1 | 0.450907  | -1.679641 | 6.260868  |
| 6 | -0.214315 | -1.468445 | 5.304232  | 6 | -0.020076 | 0.8755    | 5.353545  |
| 1 | -0.208117 | -1.508162 | 6.398638  | 1 | -0.1249   | 0.789298  | 6.440324  |
| 1 | 0.505366  | -2.202782 | 4.930896  | 1 | -0.672905 | 1.683113  | 5.009846  |
| 1 | -1.208889 | -1.77082  | 4.965136  | 1 | 1.012388  | 1.164137  | 5.139276  |
| 6 | 1.512231  | 0.309499  | 5.411227  | 6 | -1.819242 | -0.813093 | 5.096121  |
| 1 | 1.45947   | 0.269616  | 6.503364  | 1 | -1.865847 | -0.903828 | 6.185344  |
| 1 | 1.818686  | 1.322397  | 5.132843  | 1 | -2.138963 | -1.769418 | 4.671389  |
| 1 | 2.293178  | -0.387051 | 5.091993  | 1 | -2.538873 | -0.0449   | 4.797936  |
| 6 | 4.230617  | 2.54464   | 1.831234  | 6 | -4.346116 | -2.4104   | 1.024911  |
| 1 | 3.498069  | 3.298638  | 1.563619  | 1 | -3.648339 | -3.184822 | 0.725611  |
| 6 | 5.237619  | 2.754714  | 2.754945  | 6 | -5.445005 | -2.661585 | 1.821947  |
| 1 | 5.346532  | 3.705667  | 3.259824  | 1 | -5.673959 | -3.652344 | 2.187276  |
| 6 | 6.0955    | 1.686798  | 2.995171  | 6 | -6.233561 | -1.552896 | 2.119069  |
| 1 | 6.914221  | 1.778535  | 3.705398  | 6 | -4.905464 | -0.162033 | 0.931544  |
| 6 | 4.982134  | 0.370934  | 1.513344  | 6 | -4.520425 | 1.126036  | 0.416351  |
| 6 | 4.737473  | -0.863233 | 0.804326  | 6 | -5.26019  | 2.291087  | 0.644739  |
| 6 | 5.542776  | -1.996145 | 0.94897   | 1 | -6.157688 | 2.24082   | 1.252906  |
| 1 | 6.38449   | -1.96448  | 1.633295  | 6 | -4.843485 | 3.477368  | 0.082368  |
| 6 | 5.262181  | -3.126109 | 0.21049   | 1 | -5.423046 | 4.377277  | 0.25841   |
| 1 | 5.895521  | -3.999806 | 0.322745  | 6 | -3.689816 | 3.529655  | -0.723696 |
| 6 | 4.1801    | -3.15249  | -0.689076 | 6 | -2.953893 | 2.361833  | -0.915594 |
| 6 | 3.376036  | -2.019006 | -0.799939 | 1 | -2.059308 | 2.385733  | -1.52499  |
| 1 | 2.532912  | -2.022184 | -1.479666 | 6 | -3.340262 | 1.136417  | -0.359605 |

|    |           |           |           |    |            |           |           |
|----|-----------|-----------|-----------|----|------------|-----------|-----------|
| 6  | 3.627978  | -0.853386 | -0.067116 | 6  | -3.285733  | 4.863062  | -1.353687 |
| 6  | 3.924683  | -4.419826 | -1.50651  | 6  | -4.462236  | 5.427494  | -2.165298 |
| 6  | 5.194352  | -4.793977 | -2.28665  | 1  | -4.177027  | 6.378446  | -2.627627 |
| 1  | 5.016531  | -5.693543 | -2.885624 | 1  | -5.341221  | 5.610596  | -1.542563 |
| 1  | 6.038804  | -4.996974 | -1.623603 | 1  | -4.753333  | 4.734798  | -2.960279 |
| 1  | 5.485764  | -3.985073 | -2.962833 | 6  | -2.916931  | 5.851818  | -0.237086 |
| 6  | 3.55718   | -5.565927 | -0.55117  | 1  | -2.077264  | 5.474482  | 0.354306  |
| 1  | 2.649491  | -5.327007 | 0.011271  | 1  | -3.755115  | 6.020915  | 0.444307  |
| 1  | 4.354786  | -5.759989 | 0.170955  | 1  | -2.629716  | 6.818309  | -0.66537  |
| 1  | 3.379866  | -6.488796 | -1.114324 | 6  | -2.089786  | 4.725864  | -2.296995 |
| 6  | 2.789121  | -4.245681 | -2.515577 | 1  | -1.851173  | 5.702547  | -2.729198 |
| 1  | 2.652887  | -5.175276 | -3.076703 | 1  | -2.30098   | 4.037774  | -3.120719 |
| 1  | 3.005472  | -3.449027 | -3.233176 | 1  | -1.197402  | 4.365521  | -1.778635 |
| 1  | 1.840026  | -4.009731 | -2.02741  | 6  | -4.693288  | -1.952511 | -4.25178  |
| 6  | 5.100028  | 2.730467  | -3.433901 | 1  | -5.697838  | -1.704077 | -3.89871  |
| 1  | 6.085456  | 2.524028  | -3.007358 | 1  | -4.72788   | -2.881701 | -4.821315 |
| 1  | 5.108095  | 3.712209  | -3.908278 | 1  | -4.376196  | -1.13771  | -4.90898  |
| 1  | 4.914251  | 1.963973  | -4.191711 | 6  | -3.760515  | -2.0252   | -3.070342 |
| 6  | 4.060797  | 2.614831  | -2.348624 | 6  | -3.049645  | -3.216545 | -2.85362  |
| 6  | 3.243573  | 3.725514  | -2.085366 | 1  | -3.214834  | -4.013422 | -3.567627 |
| 1  | 3.407937  | 4.603012  | -2.69784  | 6  | -2.147494  | -3.484938 | -1.813591 |
| 6  | 2.240194  | 3.821167  | -1.109972 | 6  | -1.473103  | -4.833139 | -1.786616 |
| 6  | 1.468204  | 5.112093  | -1.007174 | 1  | -0.412132  | -4.702733 | -2.020995 |
| 1  | 0.444145  | 4.940064  | -1.352583 | 1  | -1.906068  | -5.535406 | -2.499883 |
| 1  | 1.908187  | 5.914532  | -1.60045  | 1  | -1.529101  | -5.249562 | -0.777758 |
| 1  | 1.406181  | 5.417806  | 0.040162  | 17 | -7.641205  | -1.769126 | 3.113553  |
| 17 | -2.664653 | 0.192898  | -3.655461 | 17 | 3.18035    | 0.105037  | -3.492454 |
|    | Ir2-Cl-T1 |           |           |    | Ir2-2Cl-T1 |           |           |
| 77 | 2.648033  | 0.814815  | -0.055581 | 77 | -2.524279  | -0.38209  | -0.460674 |
| 77 | -2.621117 | -0.809086 | -0.045928 | 77 | 2.835564   | 0.601974  | 0.277858  |
| 7  | 5.888985  | 0.064694  | 2.498099  | 7  | -5.915387  | -0.027674 | 1.966503  |
| 7  | 4.092057  | 1.114204  | 1.357414  | 7  | -4.091886  | -0.898702 | 0.720536  |
| 7  | 1.128485  | 0.385094  | -1.414053 | 7  | -0.880359  | 0.240708  | -1.556814 |
| 7  | -1.159673 | -0.274603 | -1.41638  | 7  | 1.451452   | 0.636998  | -1.253671 |
| 7  | -4.04395  | -1.239897 | 1.373115  | 7  | 4.17236    | 0.466233  | 1.819071  |
| 7  | -5.86552  | -0.306301 | 2.565431  | 7  | 5.808781   | -0.953815 | 2.787045  |
| 8  | 4.01567   | 1.443239  | -1.59695  | 8  | -3.790514  | -0.420318 | -2.196523 |
| 8  | 1.968314  | 2.88997   | 0.001911  | 8  | -2.013681  | -2.451472 | -0.897405 |
| 8  | -2.048423 | -2.87876  | -0.284647 | 8  | 2.433009   | 2.687373  | 0.649591  |
| 8  | -4.068132 | -1.262939 | -1.588524 | 8  | 4.415871   | 1.323872  | -0.99872  |
| 6  | 5.161377  | 2.737758  | -3.165597 | 6  | -4.856806  | -1.138043 | -4.149243 |
| 1  | 6.124375  | 2.391111  | -2.781432 | 1  | -5.833807  | -0.829278 | -3.762468 |
| 1  | 5.260849  | 3.75988   | -3.532129 | 1  | -4.982937  | -2.008879 | -4.796691 |
| 1  | 4.895038  | 2.081011  | -3.998933 | 1  | -4.471476  | -0.302776 | -4.744893 |

|   |           |           |           |   |           |           |           |
|---|-----------|-----------|-----------|---|-----------|-----------|-----------|
| 6 | 4.121984  | 2.604361  | -2.082627 | 6 | -3.921448 | -1.398772 | -2.992694 |
| 6 | 3.381584  | 3.742728  | -1.723713 | 6 | -3.297653 | -2.655613 | -2.909097 |
| 1 | 3.60784   | 4.654767  | -2.261405 | 1 | -3.531504 | -3.362267 | -3.697378 |
| 6 | 2.380064  | 3.823697  | -0.74543  | 6 | -2.415932 | -3.100319 | -1.912117 |
| 6 | 1.703948  | 5.154075  | -0.526665 | 6 | -1.880308 | -4.510121 | -2.006976 |
| 1 | 0.648581  | 5.066555  | -0.801028 | 1 | -0.785635 | -4.480524 | -2.039987 |
| 1 | 2.155841  | 5.958208  | -1.108426 | 1 | -2.249807 | -5.046276 | -2.884301 |
| 1 | 1.73685   | 5.407966  | 0.53635   | 1 | -2.155647 | -5.067324 | -1.104288 |
| 6 | 4.309174  | 2.246235  | 2.027844  | 6 | -4.43149  | -2.1445   | 1.055769  |
| 1 | 3.637293  | 3.064731  | 1.793602  | 1 | -3.7995   | -2.937396 | 0.668884  |
| 6 | 5.326926  | 2.33799   | 2.959182  | 6 | -5.535971 | -2.373576 | 1.861809  |
| 6 | 6.097899  | 1.197022  | 3.153614  | 6 | -6.260497 | -1.262938 | 2.295278  |
| 1 | 6.917684  | 1.19358   | 3.868586  | 1 | -7.138683 | -1.387563 | 2.926089  |
| 6 | 4.893451  | 0.03759   | 1.612687  | 6 | -4.841738 | 0.145577  | 1.191352  |
| 6 | 4.560356  | -1.139937 | 0.846676  | 6 | -4.362553 | 1.444773  | 0.786653  |
| 6 | 5.266332  | -2.341819 | 0.952934  | 6 | -4.994589 | 2.641088  | 1.149364  |
| 1 | 6.102872  | -2.406123 | 1.641351  | 1 | -5.886119 | 2.608335  | 1.769917  |
| 6 | 4.892596  | -3.418859 | 0.178051  | 6 | -4.476752 | 3.84185   | 0.70597   |
| 1 | 5.445717  | -4.348336 | 0.265071  | 1 | -4.971069 | 4.767205  | 0.988824  |
| 6 | 3.813907  | -3.322679 | -0.721    | 6 | -3.326202 | 3.878897  | -0.108927 |
| 6 | 3.118326  | -2.117647 | -0.803668 | 6 | -2.707449 | 2.673478  | -0.446822 |
| 1 | 2.284555  | -2.024319 | -1.48803  | 1 | -1.823522 | 2.680586  | -1.074295 |
| 6 | 3.464731  | -1.002831 | -0.031766 | 6 | -3.199922 | 1.433691  | -0.017954 |
| 6 | 3.441534  | -4.539952 | -1.568009 | 6 | -2.796207 | 5.23217   | -0.587823 |
| 6 | 2.28866   | -4.249995 | -2.529927 | 6 | -1.588654 | 5.092699  | -1.518684 |
| 1 | 1.381637  | -3.950867 | -1.996742 | 1 | -0.745641 | 4.599711  | -1.021406 |
| 1 | 2.05807   | -5.150512 | -3.107793 | 1 | -1.253746 | 6.086581  | -1.838195 |
| 1 | 2.540525  | -3.454368 | -3.236722 | 1 | -1.830906 | 4.516536  | -2.418588 |
| 6 | 3.020019  | -5.688435 | -0.638009 | 6 | -2.372152 | 6.066508  | 0.632396  |
| 1 | 2.152431  | -5.401701 | -0.03589  | 1 | -1.576375 | 5.560848  | 1.191694  |
| 1 | 3.823909  | -5.968187 | 0.047904  | 1 | -3.208113 | 6.234699  | 1.319847  |
| 1 | 2.754222  | -6.574378 | -1.225223 | 1 | -1.997573 | 7.046973  | 0.312086  |
| 6 | 4.65779   | -4.97686  | -2.398731 | 6 | -3.902268 | 5.976073  | -1.354764 |
| 1 | 4.400517  | -5.842821 | -3.018193 | 1 | -3.530823 | 6.946543  | -1.706731 |
| 1 | 5.504205  | -5.257046 | -1.766495 | 1 | -4.781652 | 6.162463  | -0.729672 |
| 1 | 4.985625  | -4.169022 | -3.059247 | 1 | -4.227406 | 5.398002  | -2.226939 |
| 6 | -1.219804 | -0.15939  | -2.804388 | 6 | 1.608922  | 0.909829  | -2.613112 |
| 1 | -2.159647 | -0.355426 | -3.294891 | 1 | 2.599945  | 1.134642  | -2.976944 |
| 6 | -0.056885 | 0.195728  | -3.465522 | 6 | 0.472891  | 0.879371  | -3.407713 |
| 6 | 1.132999  | 0.456746  | -2.805711 | 6 | -0.785652 | 0.565933  | -2.909563 |
| 1 | 2.057118  | 0.717211  | -3.296225 | 1 | -1.692011 | 0.554868  | -3.495428 |
| 6 | 0.000404  | 0.021003  | -0.822271 | 6 | 0.226076  | 0.30733   | -0.827721 |
| 6 | 0.020563  | -0.058853 | 0.604852  | 6 | 0.099904  | -0.007331 | 0.561834  |
| 6 | -1.183931 | -0.418733 | 1.239173  | 6 | 1.27987   | 0.032956  | 1.332456  |



|   |           |           |           |   |           |           |           |
|---|-----------|-----------|-----------|---|-----------|-----------|-----------|
| 6 | -1.159308 | -0.475087 | 2.65457   | 6 | 1.144411  | -0.290437 | 2.705997  |
| 1 | -2.060692 | -0.742425 | 3.191749  | 1 | 2.019926  | -0.274019 | 3.345449  |
| 6 | 0.006296  | -0.195418 | 3.35425   | 6 | -0.098353 | -0.615436 | 3.240558  |
| 6 | 1.180664  | 0.1598    | 2.637937  | 6 | -1.239191 | -0.634887 | 2.390822  |
| 1 | 2.081641  | 0.370961  | 3.206598  | 1 | -2.199728 | -0.891535 | 2.831926  |
| 6 | 1.223166  | 0.252479  | 1.238048  | 6 | -1.175683 | -0.34434  | 1.017567  |
| 6 | 0.076267  | -0.254928 | 4.881424  | 6 | -0.288972 | -0.95299  | 4.721694  |
| 6 | 1.121884  | -1.299845 | 5.301001  | 6 | -1.270582 | 0.051245  | 5.349107  |
| 1 | 2.117122  | -1.058969 | 4.91909   | 1 | -2.25018  | 0.027761  | 4.860613  |
| 1 | 0.853177  | -2.291692 | 4.925948  | 1 | -0.885002 | 1.074105  | 5.272621  |
| 1 | 1.185431  | -1.351485 | 6.393149  | 1 | -1.42089  | -0.180089 | 6.410805  |
| 6 | 0.480866  | 1.123604  | 5.426556  | 6 | -0.85733  | -2.376117 | 4.853037  |
| 1 | 0.537585  | 1.093894  | 6.519772  | 1 | -1.002799 | -2.628288 | 5.910609  |
| 1 | -0.251427 | 1.88473   | 5.141833  | 1 | -0.173096 | -3.112331 | 4.416538  |
| 1 | 1.457025  | 1.440666  | 5.050383  | 1 | -1.824753 | -2.479282 | 4.35058   |
| 6 | -1.263029 | -0.639488 | 5.512015  | 6 | 1.022498  | -0.891654 | 5.509699  |
| 1 | -1.159206 | -0.666024 | 6.600768  | 1 | 0.830762  | -1.139156 | 6.560008  |
| 1 | -1.595232 | -1.630577 | 5.187851  | 1 | 1.467426  | 0.109906  | 5.482214  |
| 1 | -2.047572 | 0.084469  | 5.271741  | 1 | 1.759999  | -1.608487 | 5.130424  |
| 6 | -4.227754 | -2.416473 | 1.972421  | 6 | 4.41128   | 1.405066  | 2.738293  |
| 1 | -3.53635  | -3.203058 | 1.689117  | 1 | 3.816751  | 2.309655  | 2.653037  |
| 6 | -5.242664 | -2.587558 | 2.895248  | 6 | 5.362168  | 1.202012  | 3.724871  |
| 1 | -5.399159 | -3.538436 | 3.387342  | 1 | 5.56315   | 1.956398  | 4.47648   |
| 6 | -6.04432  | -1.480993 | 3.153591  | 6 | 6.041175  | -0.014585 | 3.697054  |
| 1 | -6.864352 | -1.541075 | 3.865189  | 1 | 6.803869  | -0.244009 | 4.439277  |
| 6 | -4.869964 | -0.204053 | 1.689202  | 6 | 4.879041  | -0.69951  | 1.866482  |
| 6 | -4.566222 | 1.030474  | 0.99589   | 6 | 4.525469  | -1.648329 | 0.829567  |
| 6 | -5.296462 | 2.205629  | 1.171793  | 6 | 5.133089  | -2.898514 | 0.69415   |
| 1 | -6.137096 | 2.212747  | 1.857598  | 1 | 5.909737  | -3.196149 | 1.392924  |
| 6 | -4.937919 | 3.337047  | 0.464584  | 6 | 4.735142  | -3.735989 | -0.334321 |
| 1 | -5.512587 | 4.246246  | 0.606709  | 1 | 5.212645  | -4.707037 | -0.43294  |
| 6 | -3.854353 | 3.329461  | -0.4322   | 6 | 3.73616   | -3.353203 | -1.251219 |
| 6 | -3.13628  | 2.144906  | -0.592438 | 6 | 3.138702  | -2.100057 | -1.093052 |
| 1 | -2.298912 | 2.106595  | -1.277068 | 1 | 2.370459  | -1.774823 | -1.784913 |
| 6 | -3.467118 | 0.987931  | 0.115036  | 6 | 3.509471  | -1.234021 | -0.059381 |
| 6 | -3.496717 | 4.608699  | -1.187241 | 6 | 3.339896  | -4.31398  | -2.37302  |
| 6 | -4.713844 | 5.082953  | -1.996034 | 6 | 4.581297  | -4.656207 | -3.214101 |
| 1 | -4.465838 | 5.998179  | -2.543338 | 1 | 4.309744  | -5.347618 | -4.020838 |
| 1 | -5.572782 | 5.300232  | -1.355703 | 1 | 5.364431  | -5.134448 | -2.616357 |
| 1 | -5.018719 | 4.323701  | -2.722014 | 1 | 5.007251  | -3.75417  | -3.667381 |
| 6 | -3.103091 | 5.69296   | -0.171595 | 6 | 2.771815  | -5.601539 | -1.753001 |
| 1 | -2.234104 | 5.379984  | 0.414683  | 1 | 1.882797  | -5.385479 | -1.149518 |
| 1 | -3.916728 | 5.912082  | 0.525137  | 1 | 3.50235   | -6.100346 | -1.107009 |
| 1 | -2.848244 | 6.622036  | -0.692291 | 1 | 2.486326  | -6.306903 | -2.543052 |

|    |                  |           |           |    |                   |           |           |
|----|------------------|-----------|-----------|----|-------------------|-----------|-----------|
| 6  | -2.328944        | 4.405605  | -2.153456 | 6  | 2.281741          | -3.718824 | -3.305738 |
| 1  | -2.110928        | 5.348223  | -2.664108 | 1  | 2.040537          | -4.441979 | -4.093011 |
| 1  | -2.557304        | 3.658209  | -2.918756 | 1  | 2.634413          | -2.802879 | -3.792925 |
| 1  | -1.419995        | 4.090296  | -1.633271 | 1  | 1.352229          | -3.483291 | -2.775332 |
| 6  | -5.226427        | -2.259589 | -3.356241 | 6  | 5.733747          | 2.682592  | -2.374888 |
| 1  | -6.186795        | -2.005361 | -2.900035 | 1  | 6.65667           | 2.26386   | -1.959619 |
| 1  | -5.318478        | -3.197639 | -3.904009 | 1  | 5.902495          | 3.725385  | -2.652694 |
| 1  | -4.982847        | -1.455606 | -4.056925 | 1  | 5.499034          | 2.105114  | -3.276122 |
| 6  | -4.170545        | -2.31347  | -2.2861   | 6  | 4.617284          | 2.519856  | -1.37484  |
| 6  | -3.408822        | -3.481354 | -2.142798 | 6  | 3.918289          | 3.658701  | -0.947255 |
| 1  | -3.618136        | -4.29395  | -2.825955 | 1  | 4.214897          | 4.608526  | -1.376345 |
| 6  | -2.427199        | -3.703113 | -1.170354 | 6  | 2.91006           | 3.687251  | 0.024934  |
| 6  | -1.741363        | -5.040817 | -1.121196 | 6  | 2.321851          | 5.015525  | 0.427388  |
| 1  | -0.675703        | -4.902276 | -1.323864 | 1  | 1.245628          | 5.010709  | 0.223388  |
| 1  | -2.153207        | -5.748932 | -1.840539 | 1  | 2.781536          | 5.855845  | -0.097639 |
| 1  | -1.822538        | -5.454632 | -0.112375 | 1  | 2.44003           | 5.156241  | 1.507539  |
| 17 | -0.093556        | 0.318603  | -5.19949  | 17 | 0.632967          | 1.247958  | -5.099013 |
| 1  | 5.507902         | 3.255315  | 3.504038  | 17 | -5.99139          | -3.97829  | 2.307502  |
|    | <b>Ir3-CI-T1</b> |           |           |    | <b>Ir3-2CI-T1</b> |           |           |
| 77 | -2.537309        | -0.876497 | -0.031149 | 77 | -2.488665         | -0.652234 | -0.156246 |
| 77 | 2.686928         | 0.899702  | -0.184643 | 77 | 2.813377          | 0.857993  | -0.06533  |
| 7  | -5.728808        | -0.668384 | 2.67878   | 7  | -6.016272         | -0.510886 | 2.146427  |
| 7  | -3.85069         | -1.417271 | 1.445983  | 7  | -3.939993         | -1.264306 | 1.237518  |
| 7  | -1.135776        | -0.237562 | -1.471122 | 7  | -1.05564          | 0.107119  | -1.487803 |
| 7  | 1.188498         | 0.322007  | -1.505919 | 7  | 1.295922          | 0.540591  | -1.454434 |
| 7  | 4.103307         | 1.371156  | 1.210365  | 7  | 4.243664          | 1.056894  | 1.382719  |
| 7  | 5.973811         | 0.513561  | 2.39152   | 7  | 6.036548          | -0.067597 | 2.454132  |
| 8  | -4.022315        | -1.612913 | -1.40476  | 8  | -4.030161         | -1.130711 | -1.580726 |
| 8  | -1.731071        | -2.871525 | -0.21667  | 8  | -1.662913         | -2.559942 | -0.741989 |
| 8  | 1.895979         | 2.928631  | -0.282566 | 8  | 2.17288           | 2.936202  | 0.092598  |
| 8  | 4.029351         | 1.4933    | -1.768084 | 8  | 4.206648          | 1.552883  | -1.559109 |
| 6  | -5.048615        | -2.73062  | -3.181736 | 6  | -5.192743         | -1.998451 | -3.411146 |
| 1  | -6.013937        | -2.569485 | -2.696159 | 1  | -6.126332         | -1.95867  | -2.843961 |
| 1  | -5.048493        | -3.690391 | -3.699063 | 1  | -5.211786         | -2.850768 | -4.091019 |
| 1  | -4.913191        | -1.927678 | -3.912565 | 1  | -5.126581         | -1.073923 | -3.991812 |
| 6  | -3.953335        | -2.624013 | -2.159236 | 6  | -4.033226         | -2.045621 | -2.455776 |
| 6  | -2.973003        | -3.626604 | -2.100537 | 6  | -3.084363         | -3.065284 | -2.584355 |
| 1  | -3.051161        | -4.439262 | -2.810895 | 1  | -3.23251          | -3.784021 | -3.379969 |
| 6  | -1.975011        | -3.722266 | -1.12724  | 6  | -2.004257         | -3.285253 | -1.718391 |
| 6  | -1.12432         | -4.961501 | -1.075955 | 6  | -1.183327         | -4.534047 | -1.896764 |
| 1  | -0.077671        | -4.678369 | -0.948906 | 1  | -0.145468         | -4.331909 | -1.630262 |
| 1  | -1.236199        | -5.578126 | -1.96817  | 1  | -1.240808         | -4.92458  | -2.91382  |
| 1  | -1.406821        | -5.555151 | -0.200214 | 1  | -1.557543         | -5.30269  | -1.211461 |
| 6  | -3.89004         | -2.599678 | 2.060072  | 6  | -4.102079         | -2.426707 | 1.868235  |

|   |           |           |           |   |           |           |           |
|---|-----------|-----------|-----------|---|-----------|-----------|-----------|
| 1 | -3.127647 | -3.31139  | 1.760981  | 6 | -5.226976 | -2.70207  | 2.631772  |
| 6 | -4.854832 | -2.865332 | 3.013884  | 1 | -5.339733 | -3.655944 | 3.12705   |
| 1 | -4.89576  | -3.82135  | 3.519034  | 6 | -6.17396  | -1.695648 | 2.716093  |
| 6 | -5.763484 | -1.847359 | 3.283557  | 1 | -7.091909 | -1.84671  | 3.278872  |
| 1 | -6.552853 | -1.986059 | 4.018572  | 6 | -4.909953 | -0.310622 | 1.439097  |
| 6 | -4.774248 | -0.471842 | 1.772682  | 6 | -4.621662 | 0.978808  | 0.859168  |
| 6 | -4.618973 | 0.777368  | 1.060321  | 6 | -5.455995 | 2.086252  | 1.030013  |
| 6 | -5.454836 | 1.876741  | 1.255618  | 1 | -6.382366 | 1.974256  | 1.582809  |
| 1 | -6.272517 | 1.804862  | 1.965015  | 6 | -5.081946 | 3.300542  | 0.492994  |
| 6 | -5.226433 | 3.034315  | 0.537695  | 1 | -5.736344 | 4.155964  | 0.624195  |
| 1 | -5.882477 | 3.884646  | 0.690719  | 6 | -3.875079 | 3.445438  | -0.21753  |
| 6 | -4.168529 | 3.127769  | -0.385043 | 6 | -3.060715 | 2.327121  | -0.377052 |
| 6 | -3.344584 | 2.018053  | -0.564313 | 1 | -2.13385  | 2.407723  | -0.928218 |
| 1 | -2.526002 | 2.059477  | -1.269973 | 6 | -3.417477 | 1.079865  | 0.14276   |
| 6 | -3.547555 | 0.832177  | 0.1451    | 6 | -3.511949 | 4.808199  | -0.805188 |
| 6 | -3.96565  | 4.428188  | -1.161396 | 6 | -2.168237 | 4.783984  | -1.534579 |
| 6 | -2.773553 | 4.353119  | -2.116489 | 1 | -1.352512 | 4.500981  | -0.862559 |
| 1 | -1.83889  | 4.163561  | -1.580232 | 1 | -1.949589 | 5.781571  | -1.92764  |
| 1 | -2.669121 | 5.306319  | -2.64352  | 1 | -2.174351 | 4.086771  | -2.377327 |
| 1 | -2.899669 | 3.568363  | -2.868027 | 6 | -3.430875 | 5.845957  | 0.324384  |
| 6 | -3.721767 | 5.577449  | -0.171665 | 1 | -2.662699 | 5.568977  | 1.052342  |
| 1 | -2.828925 | 5.388093  | 0.431383  | 1 | -4.379974 | 5.944653  | 0.857738  |
| 1 | -4.564934 | 5.715628  | 0.510635  | 1 | -3.17479  | 6.8284    | -0.086026 |
| 1 | -3.574769 | 6.516486  | -0.71536  | 6 | -4.598209 | 5.225843  | -1.808888 |
| 6 | -5.227109 | 4.721678  | -1.988439 | 1 | -4.354585 | 6.201738  | -2.241938 |
| 1 | -5.097971 | 5.650583  | -2.553716 | 1 | -5.580987 | 5.305246  | -1.336437 |
| 1 | -6.112192 | 4.835095  | -1.356738 | 1 | -4.673959 | 4.499451  | -2.622985 |
| 1 | -5.421634 | 3.91353   | -2.699243 | 6 | 1.313761  | 0.634014  | -2.837524 |
| 6 | 1.199709  | 0.235943  | -2.887957 | 1 | 2.280796  | 0.779156  | -3.299081 |
| 1 | 2.158446  | 0.37169   | -3.369997 | 6 | 0.144448  | 0.523592  | -3.536052 |
| 6 | 0.0439    | -0.025829 | -3.562063 | 1 | 0.135609  | 0.646569  | -4.612386 |
| 1 | 0.033517  | -0.047097 | -4.645165 | 6 | -1.068535 | 0.257345  | -2.87307  |
| 6 | -1.159735 | -0.270269 | -2.862915 | 6 | 0.127601  | 0.26064   | -0.882709 |
| 6 | 0.034505  | 0.055856  | -0.895969 | 6 | 0.154279  | 0.076872  | 0.534392  |
| 6 | 0.075236  | 0.044352  | 0.534353  | 6 | 1.374818  | 0.263383  | 1.175312  |
| 6 | 1.286222  | 0.372323  | 1.13654   | 6 | 1.354888  | 0.051754  | 2.576266  |
| 6 | 1.283706  | 0.322741  | 2.548481  | 1 | 2.274692  | 0.176925  | 3.135381  |
| 1 | 2.198986  | 0.558115  | 3.079231  | 6 | 0.187079  | -0.312685 | 3.265616  |
| 6 | 0.139446  | -0.019983 | 3.291211  | 6 | -0.999206 | -0.490799 | 2.543458  |
| 6 | -1.039959 | -0.342034 | 2.612196  | 1 | -1.901233 | -0.78488  | 3.070426  |
| 1 | -1.921335 | -0.618416 | 3.181606  | 6 | -1.043782 | -0.311905 | 1.141048  |
| 6 | -1.098912 | -0.327496 | 1.202446  | 6 | 0.172201  | -0.533641 | 4.781871  |
| 6 | 0.147427  | -0.054961 | 4.823266  | 6 | -0.840121 | 0.426279  | 5.425106  |
| 6 | -0.88654  | 0.947592  | 5.358155  | 1 | -1.852313 | 0.265824  | 5.044612  |

|   |           |           |           |   |           |           |           |
|---|-----------|-----------|-----------|---|-----------|-----------|-----------|
| 1 | -1.896732 | 0.71468   | 5.011246  | 1 | -0.57066  | 1.467661  | 5.22605   |
| 1 | -0.648544 | 1.963951  | 5.030953  | 1 | -0.863554 | 0.279963  | 6.510129  |
| 1 | -0.895806 | 0.933573  | 6.453266  | 6 | -0.237591 | -1.984598 | 5.077554  |
| 6 | -0.214315 | -1.468445 | 5.304232  | 1 | -0.256422 | -2.160467 | 6.158387  |
| 1 | -0.208117 | -1.508162 | 6.398638  | 1 | 0.469899  | -2.687458 | 4.628118  |
| 1 | 0.505366  | -2.202782 | 4.930896  | 1 | -1.230915 | -2.213807 | 4.682958  |
| 1 | -1.208889 | -1.77082  | 4.965136  | 6 | 1.538243  | -0.284654 | 5.424081  |
| 6 | 1.512231  | 0.309499  | 5.411227  | 1 | 1.466977  | -0.450337 | 6.503163  |
| 1 | 1.45947   | 0.269616  | 6.503364  | 1 | 1.879035  | 0.743555  | 5.268833  |
| 1 | 1.818686  | 1.322397  | 5.132843  | 1 | 2.302362  | -0.964494 | 5.035496  |
| 1 | 2.293178  | -0.387051 | 5.091993  | 6 | 4.438899  | 2.130818  | 2.148834  |
| 6 | 4.230617  | 2.54464   | 1.831234  | 1 | 3.760661  | 2.959257  | 1.975248  |
| 1 | 3.498069  | 3.298638  | 1.563619  | 6 | 5.444396  | 2.153346  | 3.097385  |
| 6 | 5.237619  | 2.754714  | 2.754945  | 1 | 5.608641  | 3.022735  | 3.720446  |
| 1 | 5.346532  | 3.705667  | 3.259824  | 6 | 6.226003  | 1.007993  | 3.204466  |
| 6 | 6.0955    | 1.686798  | 2.995171  | 1 | 7.037643  | 0.952774  | 3.92642   |
| 1 | 6.914221  | 1.778535  | 3.705398  | 6 | 5.051131  | -0.029322 | 1.558596  |
| 6 | 4.982134  | 0.370934  | 1.513344  | 6 | 4.741195  | -1.141589 | 0.690675  |
| 6 | 4.737473  | -0.863233 | 0.804326  | 6 | 5.474698  | -2.330411 | 0.688162  |
| 6 | 5.542776  | -1.996145 | 0.94897   | 1 | 6.302941  | -2.44435  | 1.380031  |
| 1 | 6.38449   | -1.96448  | 1.633295  | 6 | 5.143565  | -3.329409 | -0.202999 |
| 6 | 5.262181  | -3.126109 | 0.21049   | 1 | 5.720444  | -4.248116 | -0.201406 |
| 1 | 5.895521  | -3.999806 | 0.322745  | 6 | 4.084519  | -3.165431 | -1.114785 |
| 6 | 4.1801    | -3.15249  | -0.689076 | 6 | 3.34687   | -1.982474 | -1.074498 |
| 6 | 3.376036  | -2.019006 | -0.799939 | 1 | 2.51856   | -1.840944 | -1.757368 |
| 1 | 2.532912  | -2.022184 | -1.479666 | 6 | 3.649143  | -0.948889 | -0.181621 |
| 6 | 3.627978  | -0.853386 | -0.067116 | 6 | 3.770491  | -4.289226 | -2.103042 |
| 6 | 3.924683  | -4.419826 | -1.50651  | 6 | 5.0436    | -4.683238 | -2.867689 |
| 6 | 5.194352  | -4.793977 | -2.28665  | 1 | 4.816322  | -5.477021 | -3.587062 |
| 1 | 5.016531  | -5.693543 | -2.885624 | 1 | 5.827486  | -5.053383 | -2.20258  |
| 1 | 6.038804  | -4.996974 | -1.623603 | 1 | 5.44631   | -3.82827  | -3.418557 |
| 1 | 5.485764  | -3.985073 | -2.962833 | 6 | 3.249641  | -5.505321 | -1.321517 |
| 6 | 3.55718   | -5.565927 | -0.55117  | 1 | 2.335253  | -5.254002 | -0.775882 |
| 1 | 2.649491  | -5.327007 | 0.011271  | 1 | 3.985263  | -5.859575 | -0.594044 |
| 1 | 4.354786  | -5.759989 | 0.170955  | 1 | 3.026201  | -6.330785 | -2.006211 |
| 1 | 3.379866  | -6.488796 | -1.114324 | 6 | 2.716635  | -3.880877 | -3.133599 |
| 6 | 2.789121  | -4.245681 | -2.515577 | 1 | 2.542092  | -4.710021 | -3.826273 |
| 1 | 2.652887  | -5.175276 | -3.076703 | 1 | 3.041191  | -3.016032 | -3.719659 |
| 1 | 3.005472  | -3.449027 | -3.233176 | 1 | 1.759537  | -3.63217  | -2.668812 |
| 1 | 1.840026  | -4.009731 | -2.02741  | 6 | 5.383176  | 2.905984  | -3.054794 |
| 6 | 5.100028  | 2.730467  | -3.433901 | 1 | 6.342329  | 2.550261  | -2.669009 |
| 1 | 6.085456  | 2.524028  | -3.007358 | 1 | 5.484525  | 3.940097  | -3.385294 |
| 1 | 5.108095  | 3.712209  | -3.908278 | 1 | 5.131345  | 2.275998  | -3.912799 |
| 1 | 4.914251  | 1.963973  | -4.191711 | 6 | 4.330422  | 2.733897  | -1.990773 |

|    |                  |           |           |    |                   |           |           |
|----|------------------|-----------|-----------|----|-------------------|-----------|-----------|
| 6  | 4.060797         | 2.614831  | -2.348624 | 6  | 3.599503          | 3.860697  | -1.583808 |
| 6  | 3.243573         | 3.725514  | -2.085366 | 1  | 3.838262          | 4.796227  | -2.073524 |
| 1  | 3.407937         | 4.603012  | -2.69784  | 6  | 2.594762          | 3.902841  | -0.606523 |
| 6  | 2.240194         | 3.821167  | -1.109972 | 6  | 1.922049          | 5.223978  | -0.334901 |
| 6  | 1.468204         | 5.112093  | -1.007174 | 1  | 0.910118          | 5.197413  | -0.750852 |
| 1  | 0.444145         | 4.940064  | -1.352583 | 1  | 2.457871          | 6.065919  | -0.774971 |
| 1  | 1.908187         | 5.914532  | -1.60045  | 1  | 1.8232            | 5.369566  | 0.743357  |
| 1  | 1.406181         | 5.417806  | 0.040162  | 17 | -2.868621         | -3.610348 | 1.768594  |
| 17 | -2.664653        | 0.192898  | -3.655461 | 17 | -2.554933         | 0.816964  | -3.615191 |
|    | <b>Ir4-Cl-t1</b> |           |           |    | <b>Ir4-2Cl-t1</b> |           |           |
| 77 | -2.632995        | -0.711182 | -0.300216 | 77 | -2.618477         | -0.315576 | -0.672139 |
| 7  | -5.846916        | -1.192553 | 2.345817  | 7  | -5.932393         | 0.094309  | 1.863587  |
| 7  | -4.011095        | -1.608822 | 0.909909  | 7  | -4.231885         | -0.809064 | 0.482287  |
| 7  | -1.113019        | 0.155878  | -1.482331 | 7  | -0.906159         | 0.236506  | -1.712653 |
| 8  | -2.018537        | -2.572663 | -1.221746 | 8  | -2.388616         | -2.349621 | -1.437503 |
| 8  | -4.173698        | -0.751015 | -1.801047 | 8  | -3.922881         | 0.032924  | -2.355783 |
| 6  | -1.420941        | -4.064314 | -2.921304 | 6  | -2.632935         | -4.258165 | -2.775143 |
| 1  | -0.398626        | -3.697121 | -3.05615  | 1  | -1.647343         | -4.30249  | -3.249467 |
| 1  | -1.781522        | -4.468767 | -3.867519 | 1  | -3.35804          | -4.715768 | -3.449699 |
| 1  | -1.3843          | -4.85513  | -2.168098 | 1  | -2.571597         | -4.831802 | -1.847939 |
| 6  | -2.265085        | -2.927666 | -2.41521  | 6  | -2.96439          | -2.819889 | -2.460569 |
| 6  | -3.237505        | -2.378341 | -3.256948 | 6  | -3.853152         | -2.15175  | -3.315879 |
| 1  | -3.342629        | -2.81524  | -4.241404 | 1  | -4.254338         | -2.727966 | -4.140253 |
| 6  | -4.159817        | -1.385217 | -2.894356 | 6  | -4.264222         | -0.811804 | -3.230134 |
| 6  | -5.256368        | -1.018707 | -3.854101 | 6  | -5.210394         | -0.283922 | -4.277576 |
| 1  | -6.214332        | -1.033823 | -3.328731 | 1  | -6.095583         | 0.127502  | -3.785325 |
| 1  | -5.298394        | -1.681512 | -4.718858 | 1  | -5.513561         | -1.046328 | -4.995725 |
| 1  | -5.088436        | 0.007297  | -4.194504 | 1  | -4.729168         | 0.541529  | -4.810119 |
| 6  | 0.128122         | 0.920988  | -3.40556  | 6  | 0.468424          | 1.137656  | -3.438169 |
| 1  | 0.132647         | 1.389935  | -4.381965 | 1  | 0.583583          | 1.642068  | -4.389875 |
| 6  | -1.085061        | 0.719444  | -2.758194 | 6  | -0.783827         | 0.816775  | -2.970674 |
| 6  | 0.090236         | -0.131253 | -0.954756 | 1  | -1.698698         | 0.981313  | -3.520628 |
| 6  | 0.094744         | -0.60491  | 0.395275  | 6  | 0.212335          | -0.007289 | -1.043746 |
| 6  | -1.14867         | -0.830268 | 0.995371  | 6  | 0.051717          | -0.554475 | 0.269956  |
| 6  | 0.079927         | -1.306612 | 3.063541  | 6  | -1.253515         | -0.681649 | 0.745876  |
| 6  | 0.039299         | -1.653922 | 4.555512  | 6  | -0.211983         | -1.424897 | 2.868148  |
| 6  | -0.740995        | -0.562418 | 5.304255  | 6  | -0.430974         | -1.863001 | 4.318167  |
| 1  | -0.775401        | -0.788359 | 6.375346  | 6  | -1.136191         | -0.733317 | 5.084844  |
| 1  | -0.264038        | 0.413369  | 5.17524   | 1  | -1.306971         | -1.032216 | 6.124441  |
| 6  | -0.661462        | -3.007311 | 4.748931  | 1  | -0.527082         | 0.175177  | 5.085458  |
| 1  | -0.124588        | -3.80287  | 4.223601  | 6  | -1.306509         | -3.125505 | 4.346174  |
| 1  | -1.688057        | -2.990528 | 4.373401  | 1  | -0.823931         | -3.946077 | 3.806762  |
| 1  | -0.699293        | -3.264484 | 5.812775  | 1  | -2.285114         | -2.954198 | 3.890414  |
| 6  | -4.161251        | -2.925261 | 1.059588  | 1  | -1.472194         | -3.445722 | 5.380087  |

|    |           |           |           |    |           |           |           |
|----|-----------|-----------|-----------|----|-----------|-----------|-----------|
| 1  | -3.456566 | -3.544232 | 0.51414   | 6  | -4.710233 | -2.037971 | 0.688755  |
| 6  | -5.165051 | -3.430361 | 1.86407   | 1  | -4.171261 | -2.841011 | 0.198195  |
| 1  | -5.296437 | -4.496505 | 1.994004  | 6  | -5.818023 | -2.258507 | 1.482497  |
| 6  | -5.993098 | -2.502107 | 2.487393  | 1  | -6.213609 | -3.249592 | 1.652515  |
| 1  | -6.808746 | -2.826782 | 3.129247  | 6  | -6.388884 | -1.117879 | 2.041865  |
| 6  | -4.857527 | -0.767485 | 1.563476  | 6  | -4.854555 | 0.240963  | 1.088865  |
| 6  | -4.572376 | 0.632631  | 1.348072  | 6  | -4.249274 | 1.522026  | 0.833133  |
| 6  | -3.467789 | 0.912291  | 0.509181  | 6  | -3.090308 | 1.492994  | 0.020269  |
| 6  | -3.887425 | 3.293947  | 0.853123  | 6  | -3.023259 | 3.935454  | 0.177263  |
| 6  | -4.978253 | 2.973049  | 1.672678  | 6  | -4.162137 | 3.914464  | 0.996762  |
| 6  | -5.319717 | 1.654937  | 1.924131  | 6  | -4.772247 | 2.718743  | 1.324193  |
| 1  | -6.163313 | 1.404157  | 2.55875   | 1  | -5.661478 | 2.695209  | 1.946052  |
| 6  | -2.082553 | 4.982596  | 1.154887  | 6  | -0.882072 | 5.232583  | 0.163443  |
| 1  | -2.080676 | 4.834384  | 2.239025  | 1  | -0.781388 | 5.133364  | 1.248299  |
| 1  | -1.758367 | 6.008154  | 0.948702  | 1  | -0.395406 | 6.164959  | -0.142292 |
| 1  | -1.344283 | 4.303482  | 0.72333   | 1  | -0.340735 | 4.405124  | -0.300969 |
| 6  | -4.445829 | 5.751232  | 1.198417  | 6  | -3.020598 | 6.473091  | 0.376241  |
| 1  | -4.473087 | 5.669574  | 2.289283  | 1  | -2.971503 | 6.446226  | 1.469149  |
| 1  | -5.464767 | 5.632669  | 0.816938  | 1  | -4.069546 | 6.56766   | 0.080213  |
| 1  | -4.116791 | 6.765362  | 0.953513  | 1  | -2.501206 | 7.376639  | 0.042933  |
| 6  | -3.48264  | 4.74085   | 0.572168  | 6  | -2.359248 | 5.244809  | -0.25177  |
| 6  | -3.457238 | 4.981896  | -0.94485  | 6  | -2.456078 | 5.373261  | -1.780343 |
| 1  | -3.157649 | 6.014321  | -1.153403 | 1  | -1.982559 | 6.303828  | -2.111685 |
| 1  | -4.447236 | 4.818444  | -1.380978 | 1  | -3.501153 | 5.385805  | -2.103682 |
| 1  | -2.755623 | 4.318919  | -1.45625  | 1  | -1.959467 | 4.541197  | -2.285749 |
| 77 | 2.844184  | -0.556673 | -0.27773  | 77 | 2.811092  | -0.81344  | -0.184921 |
| 7  | 5.917084  | -0.119079 | 2.542973  | 7  | 5.719237  | -1.684455 | 2.704402  |
| 7  | 4.304477  | -1.040988 | 1.068045  | 7  | 4.003878  | -1.87985  | 1.086453  |
| 7  | 1.278024  | 0.011025  | -1.525702 | 7  | 1.473285  | 0.226486  | -1.444431 |
| 8  | 2.585837  | -2.625494 | -0.916418 | 8  | 2.161002  | -2.574615 | -1.255462 |
| 8  | 4.31081   | -0.407288 | -1.856297 | 8  | 4.464033  | -0.903199 | -1.560616 |
| 6  | 2.735163  | -4.60558  | -2.15197  | 6  | 1.601598  | -3.949597 | -3.05899  |
| 1  | 1.652513  | -4.706948 | -2.050755 | 1  | 0.559839  | -3.623901 | -3.000054 |
| 1  | 3.053886  | -4.979063 | -3.125897 | 1  | 1.865708  | -4.163626 | -4.094826 |
| 1  | 3.190356  | -5.22661  | -1.373272 | 1  | 1.685211  | -4.86566  | -2.466708 |
| 6  | 3.122536  | -3.165563 | -1.926144 | 6  | 2.464962  | -2.881458 | -2.449802 |
| 6  | 4.042768  | -2.580082 | -2.807074 | 6  | 3.523725  | -2.350313 | -3.191535 |
| 1  | 4.397695  | -3.200145 | -3.620531 | 1  | 3.668368  | -2.732211 | -4.193559 |
| 6  | 4.586711  | -1.2887   | -2.717837 | 6  | 4.486956  | -1.458114 | -2.696886 |
| 6  | 5.618046  | -0.871439 | -3.734038 | 6  | 5.675593  | -1.115614 | -3.548847 |
| 1  | 6.546649  | -0.617639 | -3.215099 | 1  | 6.587141  | -1.224675 | -2.956506 |
| 1  | 5.818504  | -1.645146 | -4.475854 | 1  | 5.740761  | -1.731342 | -4.446258 |
| 1  | 5.277358  | 0.036779  | -4.238825 | 1  | 5.599597  | -0.063559 | -3.839163 |
| 6  | 1.312512  | 0.538698  | -2.812569 | 6  | 1.607609  | 0.825958  | -2.695425 |

|    |           |           |           |    |           |           |           |
|----|-----------|-----------|-----------|----|-----------|-----------|-----------|
| 1  | 2.280986  | 0.619335  | -3.28272  | 6  | 1.219576  | -0.891684 | 0.971133  |
| 6  | 1.335516  | -0.757655 | 1.007043  | 6  | 1.055784  | -1.33216  | 2.304523  |
| 6  | 1.289576  | -1.106605 | 2.377948  | 1  | -2.104998 | -0.483946 | 4.644695  |
| 1  | -1.770263 | -0.479879 | 4.94548   | 6  | 0.881876  | -2.179444 | 5.036678  |
| 6  | 1.435674  | -1.748461 | 5.173662  | 1  | 1.42035   | -3.001937 | 4.555547  |
| 1  | 2.037897  | -2.532365 | 4.70407   | 1  | 1.543605  | -1.309096 | 5.076684  |
| 1  | 1.979978  | -0.802654 | 5.095937  | 1  | 0.6702    | -2.481303 | 6.066708  |
| 1  | 1.346888  | -1.992645 | 6.236488  | 6  | 4.035633  | -3.209844 | 1.174721  |
| 6  | 4.673498  | -2.275832 | 1.411449  | 1  | 3.337572  | -3.740634 | 0.535768  |
| 1  | 4.128178  | -3.077848 | 0.925392  | 6  | 4.917608  | -3.833292 | 2.036592  |
| 6  | 5.684029  | -2.485079 | 2.33116   | 1  | 4.953664  | -4.91159  | 2.118754  |
| 1  | 5.989534  | -3.484555 | 2.611936  | 6  | 5.751045  | -3.00719  | 2.784134  |
| 6  | 6.282566  | -1.350276 | 2.868492  | 1  | 6.474367  | -3.428246 | 3.47839   |
| 1  | 7.088591  | -1.435787 | 3.593803  | 6  | 4.844509  | -1.143613 | 1.860503  |
| 6  | 4.93425   | 0.018394  | 1.654348  | 6  | 4.688492  | 0.28479   | 1.698355  |
| 6  | 4.438047  | 1.307472  | 1.230497  | 6  | 3.694902  | 0.697267  | 0.778781  |
| 6  | 3.364897  | 1.275826  | 0.309598  | 6  | 4.26638   | 3.016115  | 1.288055  |
| 6  | 3.452626  | 3.719286  | 0.233498  | 6  | 5.240989  | 2.565153  | 2.187986  |
| 6  | 4.49806   | 3.706491  | 1.167823  | 6  | 5.453255  | 1.212312  | 2.396747  |
| 6  | 4.988747  | 2.511778  | 1.664457  | 1  | 6.209275  | 0.863034  | 3.092154  |
| 1  | 5.809244  | 2.494406  | 2.374584  | 6  | 2.570522  | 4.838452  | 1.430573  |
| 6  | 1.426115  | 5.148123  | -0.109824 | 1  | 2.394273  | 4.633335  | 2.490762  |
| 1  | 1.225458  | 5.170142  | 0.965342  | 1  | 2.366634  | 5.898781  | 1.248736  |
| 1  | 1.039714  | 6.074082  | -0.549222 | 1  | 1.850799  | 4.255192  | 0.852866  |
| 1  | 0.865125  | 4.314803  | -0.539379 | 6  | 4.952281  | 5.39736   | 1.858857  |
| 6  | 3.627921  | 6.257371  | 0.17869   | 1  | 4.818279  | 5.252618  | 2.935322  |
| 1  | 3.477757  | 6.35285   | 1.258484  | 1  | 6.004007  | 5.220713  | 1.613619  |
| 1  | 4.70369   | 6.244304  | -0.02017  | 1  | 4.734151  | 6.446372  | 1.638747  |
| 1  | 3.215873  | 7.15397   | -0.294167 | 6  | 4.017326  | 4.5037    | 1.041686  |
| 6  | 2.930368  | 5.017669  | -0.383804 | 6  | 4.23544   | 4.813438  | -0.447517 |
| 6  | 3.16841   | 4.977384  | -1.901624 | 1  | 4.047578  | 5.874793  | -0.640506 |
| 1  | 2.798845  | 5.897803  | -2.366644 | 1  | 5.264475  | 4.590082  | -0.744918 |
| 1  | 4.235281  | 4.884516  | -2.125655 | 1  | 3.569852  | 4.231237  | -1.089181 |
| 1  | 2.653897  | 4.132646  | -2.366395 | 1  | -4.583122 | 4.838154  | 1.373375  |
| 1  | -5.571652 | 3.760104  | 2.120788  | 1  | 5.847134  | 3.277298  | 2.733835  |
| 1  | 4.944329  | 4.63496   | 1.501707  | 1  | 1.928757  | -1.591774 | 2.890534  |
| 1  | 2.222065  | -1.221417 | 2.918113  | 6  | -2.501964 | 2.720941  | -0.281185 |
| 6  | -3.147282 | 2.249057  | 0.287187  | 1  | -1.622103 | 2.727932  | -0.916402 |
| 1  | -2.300538 | 2.476014  | -0.350363 | 6  | 3.50516   | 2.064518  | 0.597877  |
| 6  | 2.894128  | 2.499415  | -0.164018 | 1  | 2.748286  | 2.390709  | -0.106228 |
| 1  | 2.083089  | 2.4947    | -0.885421 | 6  | -1.346749 | -1.112293 | 2.078726  |
| 6  | -1.126126 | -1.187188 | 2.361699  | 1  | -2.328653 | -1.212647 | 2.532323  |
| 1  | -2.062603 | -1.364974 | 2.880988  | 17 | 3.10791   | 1.644172  | -3.036006 |
| 17 | -2.507715 | 1.559797  | -3.297524 | 17 | -7.793964 | -1.292106 | 3.04814   |

| Ir5-CI-T1 |           |           |           | Ir5-2CI-T1 |           |           |           |
|-----------|-----------|-----------|-----------|------------|-----------|-----------|-----------|
| 77        | -2.632995 | -0.711182 | -0.300216 | 77         | 2.622228  | -0.033164 | 0.498273  |
| 7         | -5.846916 | -1.192553 | 2.345817  | 7          | 5.974162  | -0.048693 | -2.013852 |
| 7         | -4.011095 | -1.608822 | 0.909909  | 7          | 4.253766  | -0.700854 | -0.522337 |
| 7         | -1.113019 | 0.155878  | -1.482331 | 7          | 0.893895  | 0.60859   | 1.461711  |
| 8         | -2.018537 | -2.572663 | -1.221746 | 8          | 2.445598  | -1.863982 | 1.673643  |
| 8         | -4.173698 | -0.751015 | -1.801047 | 8          | 3.911324  | 0.702319  | 2.05837   |
| 6         | -1.420941 | -4.064314 | -2.921304 | 6          | 2.584179  | -3.359736 | 3.471006  |
| 1         | -0.398626 | -3.697121 | -3.05615  | 1          | 1.577376  | -3.274143 | 3.893404  |
| 1         | -1.781522 | -4.468767 | -3.867519 | 1          | 3.27016   | -3.632931 | 4.274029  |
| 1         | -1.3843   | -4.85513  | -2.168098 | 1          | 2.558947  | -4.148739 | 2.716617  |
| 6         | -2.265085 | -2.927666 | -2.41521  | 6          | 2.946752  | -2.047936 | 2.821026  |
| 6         | -3.237505 | -2.378341 | -3.256948 | 6          | 3.77673   | -1.170612 | 3.533406  |
| 1         | -3.342629 | -2.81524  | -4.241404 | 1          | 4.122445  | -1.513268 | 4.500634  |
| 6         | -4.159817 | -1.385217 | -2.894356 | 6          | 4.204359  | 0.105035  | 3.132539  |
| 6         | -5.256368 | -1.018707 | -3.854101 | 6          | 5.102701  | 0.884339  | 4.057425  |
| 1         | -6.214332 | -1.033823 | -3.328731 | 1          | 5.990332  | 1.206535  | 3.507105  |
| 1         | -5.298394 | -1.681512 | -4.718858 | 1          | 5.403667  | 0.312203  | 4.935484  |
| 1         | -5.088436 | 0.007297  | -4.194504 | 1          | 4.580922  | 1.78977   | 4.38148   |
| 6         | 0.128122  | 0.920988  | -3.40556  | 6          | -0.537764 | 1.548778  | 3.109418  |
| 1         | 0.132647  | 1.389935  | -4.381965 | 6          | 0.739957  | 1.39778   | 2.600107  |
| 6         | -1.085061 | 0.719444  | -2.758194 | 1          | 1.620838  | 1.857715  | 3.019094  |
| 6         | 0.090236  | -0.131253 | -0.954756 | 6          | -0.199315 | 0.071871  | 0.935133  |
| 6         | 0.094744  | -0.60491  | 0.395275  | 6          | -0.034908 | -0.626431 | -0.302616 |
| 6         | -1.14867  | -0.830268 | 0.995371  | 6          | 1.2624    | -0.713851 | -0.808139 |
| 6         | 0.079927  | -1.306612 | 3.063541  | 6          | 0.214201  | -1.752388 | -2.801068 |
| 6         | 0.039299  | -1.653922 | 4.555512  | 6          | 0.426629  | -2.33932  | -4.198105 |
| 6         | -0.740995 | -0.562418 | 5.304255  | 6          | 1.055494  | -1.269684 | -5.104813 |
| 1         | -0.775401 | -0.788359 | 6.375346  | 1          | 1.217473  | -1.675188 | -6.109133 |
| 1         | -0.264038 | 0.413369  | 5.17524   | 1          | 0.40044   | -0.397857 | -5.189236 |
| 6         | -0.661462 | -3.007311 | 4.748931  | 6          | 1.36789   | -3.550623 | -4.106017 |
| 1         | -0.124588 | -3.80287  | 4.223601  | 1          | 0.943188  | -4.326413 | -3.46199  |
| 1         | -1.688057 | -2.990528 | 4.373401  | 1          | 2.34605   | -3.278733 | -3.701332 |
| 1         | -0.699293 | -3.264484 | 5.812775  | 1          | 1.526859  | -3.980002 | -5.100832 |
| 6         | -4.161251 | -2.925261 | 1.059588  | 6          | 4.752068  | -1.934324 | -0.453162 |
| 1         | -3.456566 | -3.544232 | 0.51414   | 1          | 4.221451  | -2.636111 | 0.180599  |
| 6         | -5.165051 | -3.430361 | 1.86407   | 6          | 5.889546  | -2.263809 | -1.166682 |
| 1         | -5.296437 | -4.496505 | 1.994004  | 6          | 6.478221  | -1.268117 | -1.940905 |
| 6         | -5.993098 | -2.502107 | 2.487393  | 1          | 7.378578  | -1.474336 | -2.513964 |
| 1         | -6.808746 | -2.826782 | 3.129247  | 6          | 4.872535  | 0.222372  | -1.314593 |
| 6         | -4.857527 | -0.767485 | 1.563476  | 6          | 4.218667  | 1.507164  | -1.339212 |
| 6         | -4.572376 | 0.632631  | 1.348072  | 6          | 3.035287  | 1.603124  | -0.56788  |
| 6         | -3.467789 | 0.912291  | 0.509181  | 6          | 2.863143  | 3.940177  | -1.276775 |
| 6         | -3.887425 | 3.293947  | 0.853123  | 6          | 4.04196   | 3.799906  | -2.023714 |



|    |           |           |           |    |           |           |           |
|----|-----------|-----------|-----------|----|-----------|-----------|-----------|
| 6  | -4.978253 | 2.973049  | 1.672678  | 6  | 4.713551  | 2.592752  | -2.061272 |
| 6  | -5.319717 | 1.654937  | 1.924131  | 1  | 5.627493  | 2.476987  | -2.63508  |
| 1  | -6.163313 | 1.404157  | 2.55875   | 6  | 0.759352  | 5.063768  | -1.976712 |
| 6  | -2.082553 | 4.982596  | 1.154887  | 1  | 0.933915  | 4.802373  | -3.024855 |
| 1  | -2.080676 | 4.834384  | 2.239025  | 1  | 0.165694  | 5.983995  | -1.946346 |
| 1  | -1.758367 | 6.008154  | 0.948702  | 1  | 0.169277  | 4.26198   | -1.527396 |
| 1  | -1.344283 | 4.303482  | 0.72333   | 6  | 2.849779  | 6.407123  | -1.904689 |
| 6  | -4.445829 | 5.751232  | 1.198417  | 1  | 3.015086  | 6.223537  | -2.970402 |
| 1  | -4.473087 | 5.669574  | 2.289283  | 1  | 3.820265  | 6.581155  | -1.430005 |
| 1  | -5.464767 | 5.632669  | 0.816938  | 1  | 2.266005  | 7.328612  | -1.818394 |
| 1  | -4.116791 | 6.765362  | 0.953513  | 6  | 2.090057  | 5.259179  | -1.235764 |
| 6  | -3.48264  | 4.74085   | 0.572168  | 6  | 1.813269  | 5.661772  | 0.220293  |
| 6  | -3.457238 | 4.981896  | -0.94485  | 1  | 1.26477   | 6.609322  | 0.249196  |
| 1  | -3.157649 | 6.014321  | -1.153403 | 1  | 2.748909  | 5.792057  | 0.772065  |
| 1  | -4.447236 | 4.818444  | -1.380978 | 1  | 1.216355  | 4.914943  | 0.748536  |
| 1  | -2.755623 | 4.318919  | -1.45625  | 77 | -2.773351 | -0.935904 | 0.246205  |
| 77 | 2.844184  | -0.556673 | -0.27773  | 7  | -5.734171 | -1.791979 | -2.59709  |
| 7  | 5.917084  | -0.119079 | 2.542973  | 7  | -4.019265 | -2.007937 | -0.979022 |
| 7  | 4.304477  | -1.040988 | 1.068045  | 7  | -1.445694 | 0.167217  | 1.404084  |
| 7  | 1.278024  | 0.011025  | -1.525702 | 8  | -2.159822 | -2.696981 | 1.338189  |
| 8  | 2.585837  | -2.625494 | -0.916418 | 8  | -4.32755  | -0.828669 | 1.74332   |
| 8  | 4.31081   | -0.407288 | -1.856297 | 6  | -1.688782 | -4.155525 | 3.101141  |
| 6  | 2.735163  | -4.60558  | -2.15197  | 1  | -0.621039 | -3.957136 | 2.979831  |
| 1  | 1.652513  | -4.706948 | -2.050755 | 1  | -1.916636 | -4.33466  | 4.152143  |
| 1  | 3.053886  | -4.979063 | -3.125897 | 1  | -1.914064 | -5.059761 | 2.52731   |
| 1  | 3.190356  | -5.22661  | -1.373272 | 6  | -2.463772 | -3.000257 | 2.531175  |
| 6  | 3.122536  | -3.165563 | -1.926144 | 6  | -3.453775 | -2.392248 | 3.311076  |
| 6  | 4.042768  | -2.580082 | -2.807074 | 1  | -3.596468 | -2.774645 | 4.313207  |
| 1  | 4.397695  | -3.200145 | -3.620531 | 6  | -4.343409 | -1.40186  | 2.872235  |
| 6  | 4.586711  | -1.2887   | -2.717837 | 6  | -5.451082 | -0.959678 | 3.788354  |
| 6  | 5.618046  | -0.871439 | -3.734038 | 1  | -6.411673 | -1.123024 | 3.292186  |
| 1  | 6.546649  | -0.617639 | -3.215099 | 1  | -5.441404 | -1.484849 | 4.743544  |
| 1  | 5.818504  | -1.645146 | -4.475854 | 1  | -5.361798 | 0.115991  | 3.965032  |
| 1  | 5.277358  | 0.036779  | -4.238825 | 6  | -1.648962 | 0.944392  | 2.542747  |
| 6  | 1.312512  | 0.538698  | -2.812569 | 1  | -2.649858 | 1.031048  | 2.934438  |
| 1  | 2.280986  | 0.619335  | -3.28272  | 6  | -1.20526  | -1.090358 | -0.933731 |
| 6  | 1.335516  | -0.757655 | 1.007043  | 6  | -1.043966 | -1.661781 | -2.218672 |
| 6  | 1.289576  | -1.106605 | 2.377948  | 1  | 2.02011   | -0.925561 | -4.723418 |
| 1  | -1.770263 | -0.479879 | 4.94548   | 6  | -0.880726 | -2.801306 | -4.843303 |
| 6  | 1.435674  | -1.748461 | 5.173662  | 1  | -1.365508 | -3.590436 | -4.260042 |
| 1  | 2.037897  | -2.532365 | 4.70407   | 1  | -1.588232 | -1.975592 | -4.964189 |
| 1  | 1.979978  | -0.802654 | 5.095937  | 1  | -0.672027 | -3.206773 | -5.837725 |
| 1  | 1.346888  | -1.992645 | 6.236488  | 6  | -4.072511 | -3.337681 | -1.065942 |
| 6  | 4.673498  | -2.275832 | 1.411449  | 1  | -3.380386 | -3.878216 | -0.428735 |

|    |                  |           |           |    |                   |           |           |
|----|------------------|-----------|-----------|----|-------------------|-----------|-----------|
| 1  | 4.128178         | -3.077848 | 0.925392  | 6  | -4.964925         | -3.950552 | -1.92498  |
| 6  | 5.684029         | -2.485079 | 2.33116   | 1  | -5.017144         | -5.028467 | -2.003998 |
| 1  | 5.989534         | -3.484555 | 2.611936  | 6  | -5.785584         | -3.114516 | -2.675104 |
| 6  | 6.282566         | -1.350276 | 2.868492  | 1  | -6.513885         | -3.526011 | -3.3698   |
| 1  | 7.088591         | -1.435787 | 3.593803  | 6  | -4.851727         | -1.262007 | -1.755051 |
| 6  | 4.93425          | 0.018394  | 1.654348  | 6  | -4.694626         | 0.167118  | -1.583618 |
| 6  | 4.438047         | 1.307472  | 1.230497  | 6  | -3.687295         | 0.574603  | -0.678441 |
| 6  | 3.364897         | 1.275826  | 0.309598  | 6  | -4.362831         | 2.891692  | -1.042073 |
| 6  | 3.452626         | 3.719286  | 0.233498  | 6  | -5.328367         | 2.45005   | -1.956117 |
| 6  | 4.49806          | 3.706491  | 1.167823  | 6  | -5.497178         | 1.101355  | -2.228636 |
| 6  | 4.988747         | 2.511778  | 1.664457  | 1  | -6.258656         | 0.760729  | -2.922407 |
| 1  | 5.809244         | 2.494406  | 2.374584  | 6  | -2.760149         | 4.809798  | -0.962797 |
| 6  | 1.426115         | 5.148123  | -0.109824 | 1  | -2.510108         | 4.67971   | -2.019648 |
| 1  | 1.225458         | 5.170142  | 0.965342  | 1  | -2.634284         | 5.8675    | -0.709514 |
| 1  | 1.039714         | 6.074082  | -0.549222 | 1  | -2.037867         | 4.24018   | -0.373805 |
| 1  | 0.865125         | 4.314803  | -0.539379 | 6  | -5.14647          | 5.27178   | -1.471185 |
| 6  | 3.627921         | 6.257371  | 0.17869   | 1  | -4.970219         | 5.19921   | -2.548885 |
| 1  | 3.477757         | 6.35285   | 1.258484  | 1  | -6.197291         | 5.037521  | -1.275638 |
| 1  | 4.70369          | 6.244304  | -0.02017  | 1  | -4.981966         | 6.31299   | -1.179319 |
| 1  | 3.215873         | 7.15397   | -0.294167 | 6  | -4.201276         | 4.367348  | -0.678303 |
| 6  | 2.930368         | 5.017669  | -0.383804 | 6  | -4.501711         | 4.544197  | 0.818613  |
| 6  | 3.16841          | 4.977384  | -1.901624 | 1  | -4.384314         | 5.594837  | 1.10394   |
| 1  | 2.798845         | 5.897803  | -2.366644 | 1  | -5.526613         | 4.238929  | 1.049765  |
| 1  | 4.235281         | 4.884516  | -2.125655 | 1  | -3.825331         | 3.950568  | 1.438838  |
| 1  | 2.653897         | 4.132646  | -2.366395 | 1  | 4.44183           | 4.640142  | -2.577209 |
| 1  | -5.571652        | 3.760104  | 2.120788  | 1  | -5.971186         | 3.165213  | -2.454137 |
| 1  | 4.944329         | 4.63496   | 1.501707  | 1  | -1.912898         | -2.024507 | -2.753388 |
| 1  | 2.222065         | -1.221417 | 2.918113  | 6  | 2.377094          | 2.832422  | -0.572838 |
| 6  | -3.147282        | 2.249057  | 0.287187  | 1  | 1.463837          | 2.927341  | 0.006142  |
| 1  | -2.300538        | 2.476014  | -0.350363 | 6  | -3.543788         | 1.93617   | -0.427541 |
| 6  | 2.894128         | 2.499415  | -0.164018 | 1  | -2.786848         | 2.252948  | 0.281991  |
| 1  | 2.083089         | 2.4947    | -0.885421 | 6  | 1.349195          | -1.288389 | -2.08524  |
| 6  | -1.126126        | -1.187188 | 2.361699  | 1  | 2.324077          | -1.379424 | -2.556059 |
| 1  | -2.062603        | -1.364974 | 2.880988  | 17 | -0.762895         | 2.534677  | 4.523714  |
| 17 | -2.507715        | 1.559797  | -3.297524 | 17 | 6.552511          | -3.85676  | -1.0912   |
|    | <b>Ir6-Cl-T1</b> |           |           |    | <b>Ir6-2Cl-T1</b> |           |           |
| 77 | -2.632995        | -0.711182 | -0.300216 | 77 | -2.589697         | -0.448755 | -0.320465 |
| 7  | -5.846916        | -1.192553 | 2.345817  | 7  | -6.135037         | -0.560878 | 1.938628  |
| 7  | -4.011095        | -1.608822 | 0.909909  | 7  | -4.11844          | -1.248443 | 0.860857  |
| 7  | -1.113019        | 0.155878  | -1.482331 | 7  | -1.028461         | 0.398599  | -1.437861 |
| 8  | -2.018537        | -2.572663 | -1.221746 | 8  | -1.991472         | -2.193775 | -1.467423 |
| 8  | -4.173698        | -0.751015 | -1.801047 | 8  | -4.163195         | -0.304954 | -1.781183 |
| 6  | -1.420941        | -4.064314 | -2.921304 | 6  | -1.519176         | -3.552449 | -3.306973 |
| 1  | -0.398626        | -3.697121 | -3.05615  | 1  | -0.492105         | -3.197094 | -3.4345   |

|   |           |           |           |   |           |           |           |
|---|-----------|-----------|-----------|---|-----------|-----------|-----------|
| 1 | -1.781522 | -4.468767 | -3.867519 | 1 | -1.918485 | -3.847675 | -4.277713 |
| 1 | -1.3843   | -4.85513  | -2.168098 | 1 | -1.484979 | -4.419406 | -2.642172 |
| 6 | -2.265085 | -2.927666 | -2.41521  | 6 | -2.323243 | -2.458773 | -2.656629 |
| 6 | -3.237505 | -2.378341 | -3.256948 | 6 | -3.353601 | -1.853516 | -3.391661 |
| 1 | -3.342629 | -2.81524  | -4.241404 | 1 | -3.527452 | -2.222824 | -4.393928 |
| 6 | -4.159817 | -1.385217 | -2.894356 | 6 | -4.225665 | -0.870115 | -2.912484 |
| 6 | -5.256368 | -1.018707 | -3.854101 | 6 | -5.365315 | -0.414429 | -3.78066  |
| 1 | -6.214332 | -1.033823 | -3.328731 | 1 | -6.300833 | -0.504859 | -3.222417 |
| 1 | -5.298394 | -1.681512 | -4.718858 | 1 | -5.437082 | -0.979288 | -4.710517 |
| 1 | -5.088436 | 0.007297  | -4.194504 | 1 | -5.227009 | 0.645924  | -4.010452 |
| 6 | 0.128122  | 0.920988  | -3.40556  | 6 | 0.243192  | 1.157577  | -3.341671 |
| 1 | 0.132647  | 1.389935  | -4.381965 | 1 | 0.269655  | 1.665919  | -4.297735 |
| 6 | -1.085061 | 0.719444  | -2.758194 | 6 | -0.971484 | 1.016571  | -2.686861 |
| 6 | 0.090236  | -0.131253 | -0.954756 | 6 | 0.157932  | 0.003841  | -0.93978  |
| 6 | 0.094744  | -0.60491  | 0.395275  | 6 | 0.137043  | -0.536313 | 0.38281   |
| 6 | -1.14867  | -0.830268 | 0.995371  | 6 | -1.117458 | -0.720298 | 0.966536  |
| 6 | 0.079927  | -1.306612 | 3.063541  | 6 | 0.084652  | -1.39858  | 3.002343  |
| 6 | 0.039299  | -1.653922 | 4.555512  | 6 | 0.018651  | -1.842137 | 4.467472  |
| 6 | -0.740995 | -0.562418 | 5.304255  | 6 | -0.685479 | -0.753658 | 5.291955  |
| 1 | -0.775401 | -0.788359 | 6.375346  | 1 | -0.7473   | -1.055084 | 6.342996  |
| 1 | -0.264038 | 0.413369  | 5.17524   | 1 | -0.136504 | 0.19092   | 5.238387  |
| 6 | -0.661462 | -3.007311 | 4.748931  | 6 | -0.772542 | -3.154951 | 4.569809  |
| 1 | -0.124588 | -3.80287  | 4.223601  | 1 | -0.28982  | -3.946905 | 3.989537  |
| 1 | -1.688057 | -2.990528 | 4.373401  | 1 | -1.794569 | -3.045272 | 4.197781  |
| 1 | -0.699293 | -3.264484 | 5.812775  | 1 | -0.830164 | -3.481558 | 5.613602  |
| 6 | -4.161251 | -2.925261 | 1.059588  | 6 | -4.414962 | -2.51732  | 1.141288  |
| 1 | -3.456566 | -3.544232 | 0.51414   | 6 | -5.587092 | -2.872414 | 1.791784  |
| 6 | -5.165051 | -3.430361 | 1.86407   | 1 | -5.811992 | -3.908603 | 2.000682  |
| 1 | -5.296437 | -4.496505 | 1.994004  | 6 | -6.431967 | -1.834088 | 2.147805  |
| 6 | -5.993098 | -2.502107 | 2.487393  | 1 | -7.381163 | -2.038205 | 2.637287  |
| 1 | -6.808746 | -2.826782 | 3.129247  | 6 | -4.988699 | -0.29069  | 1.324104  |
| 6 | -4.857527 | -0.767485 | 1.563476  | 6 | -4.532713 | 1.066267  | 1.149511  |
| 6 | -4.572376 | 0.632631  | 1.348072  | 6 | -3.291575 | 1.22272   | 0.500197  |
| 6 | -3.467789 | 0.912291  | 0.509181  | 6 | -3.442676 | 3.623851  | 0.911493  |
| 6 | -3.887425 | 3.293947  | 0.853123  | 6 | -4.691755 | 3.42914   | 1.520088  |
| 6 | -4.978253 | 2.973049  | 1.672678  | 6 | -5.235105 | 2.163345  | 1.644201  |
| 6 | -5.319717 | 1.654937  | 1.924131  | 1 | -6.193946 | 2.00729   | 2.126789  |
| 1 | -6.163313 | 1.404157  | 2.55875   | 6 | -1.526411 | 5.017396  | 1.665229  |
| 6 | -2.082553 | 4.982596  | 1.154887  | 1 | -1.764501 | 4.826235  | 2.716026  |
| 1 | -2.080676 | 4.834384  | 2.239025  | 1 | -1.032077 | 5.992254  | 1.597163  |
| 1 | -1.758367 | 6.008154  | 0.948702  | 1 | -0.816033 | 4.254412  | 1.339146  |
| 1 | -1.344283 | 4.303482  | 0.72333   | 6 | -3.724132 | 6.121104  | 1.303527  |
| 6 | -4.445829 | 5.751232  | 1.198417  | 1 | -3.973496 | 6.004732  | 2.362568  |
| 1 | -4.473087 | 5.669574  | 2.289283  | 1 | -4.655823 | 6.161254  | 0.730822  |

|    |           |           |           |    |           |           |           |
|----|-----------|-----------|-----------|----|-----------|-----------|-----------|
| 1  | -5.464767 | 5.632669  | 0.816938  | 1  | -3.222633 | 7.086648  | 1.189147  |
| 1  | -4.116791 | 6.765362  | 0.953513  | 6  | -2.80045  | 5.007049  | 0.806809  |
| 6  | -3.48264  | 4.74085   | 0.572168  | 6  | -2.439272 | 5.3044    | -0.656091 |
| 6  | -3.457238 | 4.981896  | -0.94485  | 1  | -1.967837 | 6.289971  | -0.730948 |
| 1  | -3.157649 | 6.014321  | -1.153403 | 1  | -3.333523 | 5.303875  | -1.286156 |
| 1  | -4.447236 | 4.818444  | -1.380978 | 1  | -1.744913 | 4.568947  | -1.067919 |
| 1  | -2.755623 | 4.318919  | -1.45625  | 77 | 2.874015  | -0.642816 | -0.305791 |
| 77 | 2.844184  | -0.556673 | -0.27773  | 7  | 6.00576   | -0.586626 | 2.482323  |
| 7  | 5.917084  | -0.119079 | 2.542973  | 7  | 4.303848  | -1.306772 | 0.996783  |
| 7  | 4.304477  | -1.040988 | 1.068045  | 7  | 1.347165  | 0.096208  | -1.5151   |
| 7  | 1.278024  | 0.011025  | -1.525702 | 8  | 2.474206  | -2.645493 | -1.05115  |
| 8  | 2.585837  | -2.625494 | -0.916418 | 8  | 4.339522  | -0.520173 | -1.888432 |
| 8  | 4.31081   | -0.407288 | -1.856297 | 6  | 2.44547   | -4.556764 | -2.39653  |
| 6  | 2.735163  | -4.60558  | -2.15197  | 1  | 1.355669  | -4.56662  | -2.324409 |
| 1  | 1.652513  | -4.706948 | -2.050755 | 1  | 2.755221  | -4.917232 | -3.378121 |
| 1  | 3.053886  | -4.979063 | -3.125897 | 1  | 2.823947  | -5.244638 | -1.633412 |
| 1  | 3.190356  | -5.22661  | -1.373272 | 6  | 2.948197  | -3.166861 | -2.101912 |
| 6  | 3.122536  | -3.165563 | -1.926144 | 6  | 3.892785  | -2.600158 | -2.968548 |
| 6  | 4.042768  | -2.580082 | -2.807074 | 1  | 4.186116  | -3.194296 | -3.824591 |
| 1  | 4.397695  | -3.200145 | -3.620531 | 6  | 4.534852  | -1.3621   | -2.810186 |
| 6  | 4.586711  | -1.2887   | -2.717837 | 6  | 5.579551  | -0.958017 | -3.817354 |
| 6  | 5.618046  | -0.871439 | -3.734038 | 1  | 6.52834   | -0.79242  | -3.299491 |
| 1  | 6.546649  | -0.617639 | -3.215099 | 1  | 5.720417  | -1.7015   | -4.602427 |
| 1  | 5.818504  | -1.645146 | -4.475854 | 1  | 5.292653  | -0.00392  | -4.268322 |
| 1  | 5.277358  | 0.036779  | -4.238825 | 6  | 1.408083  | 0.673244  | -2.778662 |
| 6  | 1.312512  | 0.538698  | -2.812569 | 1  | 2.37507   | 0.709162  | -3.25695  |
| 1  | 2.280986  | 0.619335  | -3.28272  | 6  | 1.367088  | -0.804749 | 0.977395  |
| 6  | 1.335516  | -0.757655 | 1.007043  | 6  | 1.302932  | -1.235166 | 2.327557  |
| 6  | 1.289576  | -1.106605 | 2.377948  | 1  | -1.702422 | -0.567908 | 4.936161  |
| 1  | -1.770263 | -0.479879 | 4.94548   | 6  | 1.404628  | -2.075601 | 5.071524  |
| 6  | 1.435674  | -1.748461 | 5.173662  | 1  | 1.949303  | -2.867184 | 4.547599  |
| 1  | 2.037897  | -2.532365 | 4.70407   | 1  | 2.014718  | -1.167578 | 5.055877  |
| 1  | 1.979978  | -0.802654 | 5.095937  | 1  | 1.298096  | -2.384208 | 6.115713  |
| 1  | 1.346888  | -1.992645 | 6.236488  | 6  | 4.573274  | -2.582205 | 1.279371  |
| 6  | 4.673498  | -2.275832 | 1.411449  | 1  | 3.957781  | -3.314651 | 0.767754  |
| 1  | 4.128178  | -3.077848 | 0.925392  | 6  | 5.574745  | -2.913887 | 2.172442  |
| 6  | 5.684029  | -2.485079 | 2.33116   | 1  | 5.800071  | -3.946498 | 2.404871  |
| 1  | 5.989534  | -3.484555 | 2.611936  | 6  | 6.272056  | -1.857032 | 2.748427  |
| 6  | 6.282566  | -1.350276 | 2.868492  | 1  | 7.077337  | -2.04068  | 3.456034  |
| 1  | 7.088591  | -1.435787 | 3.593803  | 6  | 5.026282  | -0.330184 | 1.617218  |
| 6  | 4.93425   | 0.018394  | 1.654348  | 6  | 4.632064  | 1.013364  | 1.258445  |
| 6  | 4.438047  | 1.307472  | 1.230497  | 6  | 3.545128  | 1.11368   | 0.358798  |
| 6  | 3.364897  | 1.275826  | 0.309598  | 6  | 3.829411  | 3.542608  | 0.393684  |
| 6  | 3.452626  | 3.719286  | 0.233498  | 6  | 4.886555  | 3.399628  | 1.303192  |

|    |           |           |           |    |           |           |           |
|----|-----------|-----------|-----------|----|-----------|-----------|-----------|
| 6  | 4.49806   | 3.706491  | 1.167823  | 6  | 5.286798  | 2.146874  | 1.734682  |
| 6  | 4.988747  | 2.511778  | 1.664457  | 1  | 6.114947  | 2.03011   | 2.426202  |
| 1  | 5.809244  | 2.494406  | 2.374584  | 6  | 1.920565  | 5.145991  | 0.173115  |
| 6  | 1.426115  | 5.148123  | -0.109824 | 1  | 1.748214  | 5.130931  | 1.253214  |
| 1  | 1.225458  | 5.170142  | 0.965342  | 1  | 1.601887  | 6.121096  | -0.210692 |
| 1  | 1.039714  | 6.074082  | -0.549222 | 1  | 1.281359  | 4.384471  | -0.279806 |
| 1  | 0.865125  | 4.314803  | -0.539379 | 6  | 4.211528  | 6.057115  | 0.456178  |
| 6  | 3.627921  | 6.257371  | 0.17869   | 1  | 4.094886  | 6.108899  | 1.543077  |
| 1  | 3.477757  | 6.35285   | 1.258484  | 1  | 5.27792   | 5.969299  | 0.227517  |
| 1  | 4.70369   | 6.244304  | -0.02017  | 1  | 3.861768  | 7.006568  | 0.03988   |
| 1  | 3.215873  | 7.15397   | -0.294167 | 6  | 3.40229   | 4.907746  | -0.14741  |
| 6  | 2.930368  | 5.017669  | -0.383804 | 6  | 3.602789  | 4.924489  | -1.671087 |
| 6  | 3.16841   | 4.977384  | -1.901624 | 1  | 3.300232  | 5.894174  | -2.081018 |
| 1  | 2.798845  | 5.897803  | -2.366644 | 1  | 4.653281  | 4.757025  | -1.926928 |
| 1  | 4.235281  | 4.884516  | -2.125655 | 1  | 3.010107  | 4.149378  | -2.163452 |
| 1  | 2.653897  | 4.132646  | -2.366395 | 1  | -5.245436 | 4.275007  | 1.90788   |
| 1  | -5.571652 | 3.760104  | 2.120788  | 1  | 5.413122  | 4.271816  | 1.67016   |
| 1  | 4.944329  | 4.63496   | 1.501707  | 1  | 2.226541  | -1.445114 | 2.85435   |
| 1  | 2.222065  | -1.221417 | 2.918113  | 6  | -2.765342 | 2.509316  | 0.406293  |
| 6  | -3.147282 | 2.249057  | 0.287187  | 1  | -1.805324 | 2.637939  | -0.080827 |
| 1  | -2.300538 | 2.476014  | -0.350363 | 6  | 3.167178  | 2.391733  | -0.048653 |
| 6  | 2.894128  | 2.499415  | -0.164018 | 1  | 2.346434  | 2.486793  | -0.751989 |
| 1  | 2.083089  | 2.4947    | -0.885421 | 6  | -1.112586 | -1.156407 | 2.312155  |
| 6  | -1.126126 | -1.187188 | 2.361699  | 1  | -2.059024 | -1.306863 | 2.822758  |
| 1  | -2.062603 | -1.364974 | 2.880988  | 17 | -2.350662 | 1.936136  | -3.193651 |
| 17 | -2.507715 | 1.559797  | -3.297524 | 17 | -3.299317 | -3.744521 | 0.717649  |

Table S6. The spin densities of SOMO and SOMO+1 for other  $^3\text{MC}$  states.

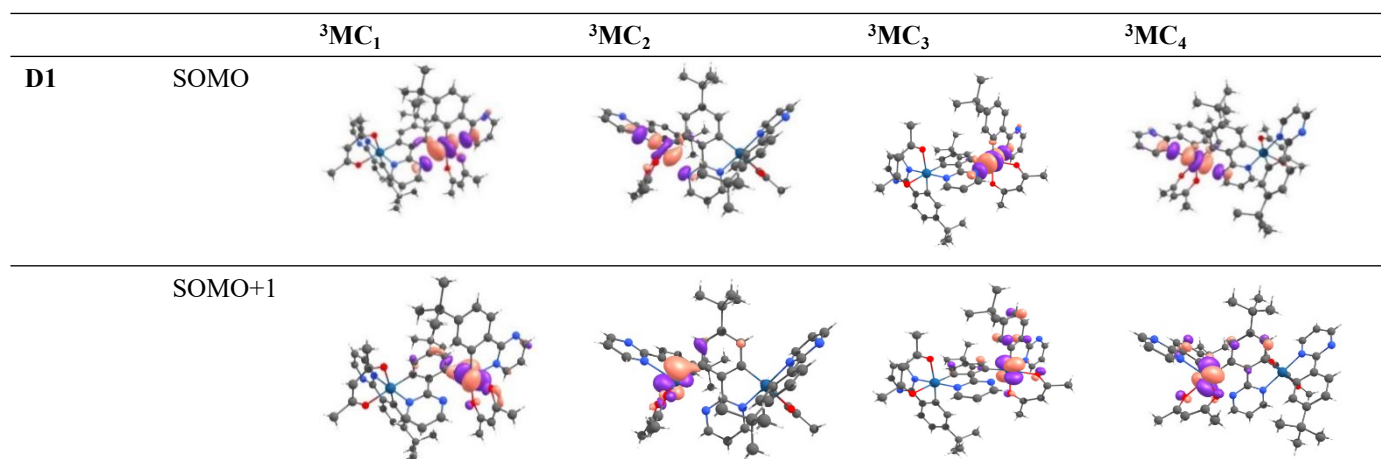

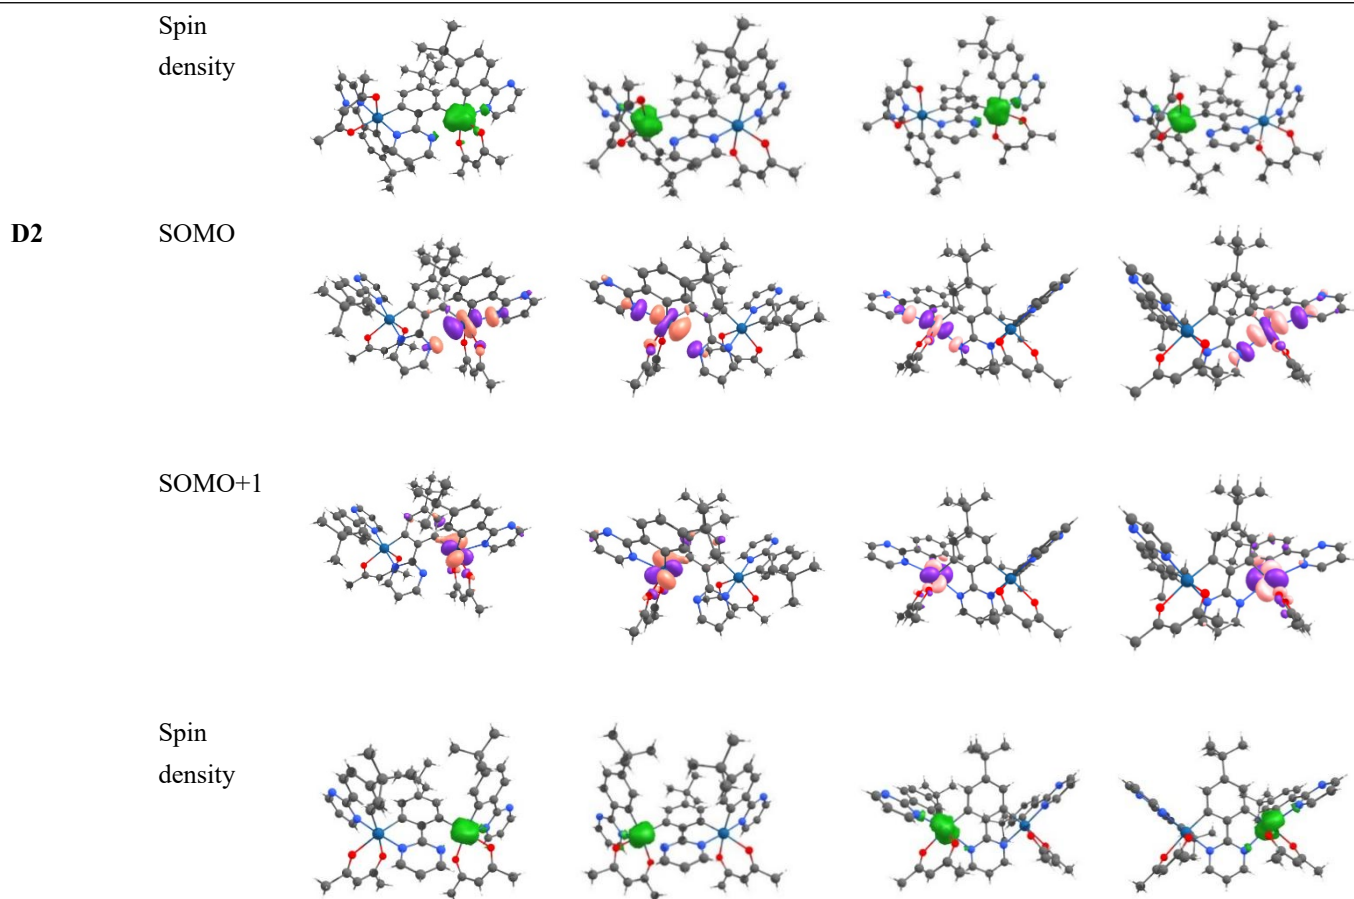

Table S7. The optimized geometries of seam crossing points for **M1**, **D1** and **D2**.

|    | MESX1 | SX2 | SX3 | SX4 |
|----|-------|-----|-----|-----|
| M1 |       |     |     |     |
| D1 |       |     |     |     |
| D2 |       |     |     |     |

**Table S8.** The calculated  $\langle T_1 | \text{SOC} | S_0 \rangle$  of the MESX state at PBE functional with ZORA-def2-tzvp (unmetal atoms)+SARC-ZORA-TZVP(Ir) basis set.

|    | $\langle T_1   \text{SOC}   S_0 \rangle$ |
|----|------------------------------------------|
| M1 | 3531 cm <sup>-1</sup>                    |
| D1 | 2118 cm <sup>-1</sup>                    |
| D2 | 2777 cm <sup>-1</sup>                    |

**Table S9.** The extended transition state coupled with natural orbitals for chemical valence (ETS-NOCV) analysis of Ir<sub>1</sub>-Cl and Ir<sub>3</sub>-Cl in the <sup>3</sup>MC state. Three pairs of NOCV (Pair1, Pair2, Pair3) are found at each alpha and beta. All These orbital energy contributions are collected (kcal/mol).

|                                                 |         | Alpha NOCV                     |                        |                |                     | Beta NOCV             |                     |      |                |
|-------------------------------------------------|---------|--------------------------------|------------------------|----------------|---------------------|-----------------------|---------------------|------|----------------|
|                                                 |         | E <sub>orb</sub><br>(kcal/mol) | E(Alpha)<br>(kcal/mol) |                | %E <sub>total</sub> | E(Beta)<br>(kcal/mol) | %E <sub>total</sub> |      |                |
| <sup>3</sup> MC state<br>of Ir <sub>1</sub> -Cl | -910.72 | E <sub>total</sub>             | -410.57                |                | 45.1                | E <sub>total</sub>    | -500.15             | 54.9 |                |
|                                                 |         | Pair1                          | -233.19                | σ-donation     | 25.6                | Pair1                 | -178.34             | 36.2 | d-backdonation |
|                                                 |         | Pair2                          | -96.09                 | σ-donation     | 10.6                | Pair2                 | -140.76             | 19.1 | d-backdonation |
|                                                 |         | Pair3                          | —                      | —              | —                   | Pair3                 | -98.58              | 8.4  | d-backdonation |
| <sup>3</sup> MC state<br>of Ir <sub>3</sub> -Cl | -797.94 | E <sub>total</sub>             | -329.77                |                | 41.3                | E <sub>total</sub>    | -468.17             | 58.7 |                |
|                                                 |         | Pair1                          | -174.24                | d-backdonation | 21.8                | Pair1                 | -119.98             | 15.0 | σ-donation     |
|                                                 |         | Pair2                          | -76.28                 | d-backdonation | 9.6                 | Pair2                 | -134.24             | 16.8 | d-backdonation |
|                                                 |         | Pair3                          | —                      | —              | —                   | Pair3                 | -99.75              | 12.5 | d-backdonation |
